# Supplementary material for: Pd-catalyzed oxidative cross-coupling between two electron rich heteroarenes
Source: Royal Society of Chemistry journal article supplement (doi:10.1039/c3sc51278a), 2013-01-01

*Supporting Information for*

# **Pd-Catalyzed Oxidative Cross-Coupling Between Two Electron-Rich Heteroarenes**

**Chun-Yang He,<sup>‡</sup> Zhen Wang,<sup>†</sup> Cai-Zhi Wu,<sup>‡</sup> Feng-Ling Qing<sup>‡,†</sup> and Xingang Zhang<sup>\*,†</sup>**

<sup>‡</sup>*College of Chemistry, Chemical Engineering and Biotechnology, Donghua University, 2999 North Renmin Lu,  
Shanghai 201620, China*

<sup>†</sup>*Key Laboratory of Organofluorine Chemistry, Shanghai Institute of Organic Chemistry, Chinese Academy of Sciences,  
345 Lingling Road, Shanghai 200032, China*

[xgzhang@mail.sioc.ac.cn](mailto:xgzhang@mail.sioc.ac.cn)

### List of Contents

|                                                                                                                                                                   |     |
|-------------------------------------------------------------------------------------------------------------------------------------------------------------------|-----|
| 1) Screens for Pd-Catalyzed Oxidative Cross-Coupling of <i>N,N</i> -Dimethylthiophene-2-carboxamide <b>1a</b> with 2-Bromo-3-hexylthiophene <b>2a</b> (Table S1). | S03 |
| 2) Typical Procedure for Pd-Catalyzed Oxidative Cross-Coupling between Two Thiophenes                                                                             | S05 |
| 3) Data for compounds <b>3</b> , <b>5-7</b> , and <b>9-11</b>                                                                                                     | S06 |
| 4) Kinetic isotope studies                                                                                                                                        | S19 |
| 5) Copies of <sup>1</sup> H NMR and <sup>13</sup> C NMR spectra of <b>3</b>                                                                                       | S22 |
| 6) Copies of <sup>1</sup> H NMR and <sup>13</sup> C NMR spectra of <b>5-7</b> , <b>9-11</b> , <i>d-1e</i> , and <i>d-2h</i> ,                                     | S47 |

**General information:**  $^1\text{H}$  NMR and  $^{13}\text{C}$  NMR spectra were recorded on a Bruker AM300 and AM400 spectrometer.  $^{19}\text{F}$  NMR was recorded on a Bruker AM300 spectrometer ( $\text{CFCl}_3$  as outside standard and low field is positive). Chemical shifts ( $\delta$ ) are reported in ppm, and coupling constants ( $J$ ) are in Hertz (Hz). The following abbreviations were used to explain the multiplicities: s = singlet, d = doublet, t = triplet, q = quartet, m = multiplet, br = broad. NMR yield was determined by  $^{19}\text{F}$  NMR using fluorobenzene as an internal standard before working up the reaction.

**Materials:** All reagents were used as received from commercial sources. All reagents were weighed and handled in air, and refilled with an inert atmosphere of  $\text{N}_2$  at room temperature. DMF and DMSO were distilled under reduced pressure from  $\text{CaH}_2$ . Toluene and 1,4-Dioxane was distilled from sodium and benzophenone immediately before use.

**Screens for Pd-Catalyzed Oxidative Cross-Coupling of *N,N*-Dimethylthiophene-2-carboxamide **1a** with 2-Bromo-3-hexylthiophene **2a** (Table S1).** To a 25 mL of Schlenck tube were added  $\text{Pd}(\text{OAc})_2$  (2.5 - 10 mol%), oxidant (1.5 - 3.0 equiv), *N,N*-dimethylthiophene-2-carboxamide **1a** (1.0 - 3.0 equiv) under  $\text{N}_2$ . Solvent (2 mL), additive (0-4.0 equiv), and 2-bromo-3-hexylthiophene **2a** (0.3 mmol-0.45 mmol, 1.0 – 1.5 equiv) were then added sequentially with stirring. The reaction mixture was stirred at 80 °C (oil bath). After stirring for 8 h, the reaction mixture was cooled to room temperature, purified with silica gel chromatography (Petroleum ether /Ethyl Acetate = 2:1) to give pure product.

**Table S1. Pd-Catalyzed Oxidative Cross-Coupling of *N,N*-Dimethylthiophene-2-carboxamide 1a with 2-Bromo-3-hexylthiophene 2a.<sup>a</sup>**

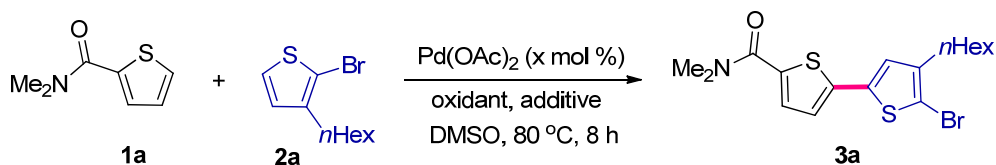

| entry     | 1a/2a      | x   | oxidant (equiv)                       | solvent            | additive (equiv)                    | yield <sup>b</sup> |
|-----------|------------|-----|---------------------------------------|--------------------|-------------------------------------|--------------------|
| 1         | 1/1.5      | 10  | AgOAc (3)                             | DMF                |                                     | ND                 |
| 2         | 1/1.5      | 10  | AgOAc (3)                             | DCE                |                                     | ND                 |
| 3         | 1/1.5      | 10  | AgOAc (3)                             | Dioxane            |                                     | ND                 |
| 4         | 1/1.5      | 10  | AgOAc (3)                             | DMF/DMSO (V/V 5%)  |                                     | 8                  |
| 5         | 1/1.5      | 10  | AgOAc (3)                             | DMF/DMSO (V/V 1:1) |                                     | 20                 |
| 6         | 1/1.5      | 10  | AgOAc (3)                             | DMSO               |                                     | 28                 |
| 7         | 1/1.5      | 10  | Cu(OAc) <sub>2</sub> (1.5)            | DMSO               |                                     | trace              |
| 8         | 1/1.5      | 10  | Cu(OAc) <sub>2</sub> (1.5)            | DMSO               | K <sub>2</sub> CO <sub>3</sub> (2)  | trace              |
| 9         | 1/1.5      | 10  | Cu(OAc) <sub>2</sub> (1.5)            | DMSO               | Cs <sub>2</sub> CO <sub>3</sub> (2) | 9                  |
| 10        | 1/1.5      | 10  | O <sub>2</sub> (1 atm)                | DMSO               | K <sub>3</sub> PO <sub>4</sub> (3)  | trace              |
| 11        | 1/1.5      | 10  | O <sub>2</sub> (1 atm)                | DMSO               | Cs <sub>2</sub> CO <sub>3</sub> (3) | trace              |
| 12        | 1/1.5      | 10  | Ag <sub>2</sub> CO <sub>3</sub> (1.5) | DMSO               |                                     | 24                 |
| 13        | 1/1.5      | 10  | Ag <sub>2</sub> O (1.5)               | DMSO               | HOAc (0.5)                          | 41                 |
| 14        | 1/1.5      | 10  | Ag <sub>2</sub> O (1.5)               | DMSO               | PivOH (0.5)                         | 39                 |
| 15        | 1/1.5      | 10  | Ag <sub>2</sub> O (1.5)               | DMSO               | AdOH (0.5)                          | 35                 |
| 16        | 1/1.5      | 10  | Ag <sub>2</sub> O (1.5)               | DMSO               | PhCO <sub>2</sub> H (0.5)           | 42                 |
| 17        | 2/1        | 10  | Ag <sub>2</sub> O (1.5)               | DMSO               | PhCOOH (0.5)                        | 46                 |
| 18        | 2/1        | 10  | Ag <sub>2</sub> O (3)                 | DMSO               | PhCOOH (3)                          | 60                 |
| 19        | 3/1        | 10  | Ag <sub>2</sub> O (3)                 | DMSO               | PhCOOH (3)                          | 67                 |
| 20        | 3/1        | 5   | Ag <sub>2</sub> O (3)                 | DMSO               | PhCOOH (3)                          | 72                 |
| 21        | 3/1        | 2.5 | Ag <sub>2</sub> O (3)                 | DMSO               | PhCOOH (3)                          | 65                 |
| 22        | 3/1        | 2.5 | Ag <sub>2</sub> O (3)                 | DMSO               | <i>o</i> Ph-PhCOOH (3)              | 71                 |
| <b>23</b> | <b>3/1</b> | 2.5 | <b>Ag<sub>2</sub>O (3)</b>            | <b>DMSO</b>        | <b><i>o</i>Ph-PhCOOH (2)</b>        | <b>71</b>          |
| 24        | 3/1        | 2.5 | Ag <sub>2</sub> O (3)                 | DMSO               | <i>o</i> Ph-PhCOOH (1)              | 58                 |
| 25        | 3/1        | 2.5 | Ag <sub>2</sub> O (3)                 | DMSO               | <i>o</i> Ph-PhCOOH (0.5)            | 56                 |
| 26        | 3/1        | 2.5 | Ag <sub>2</sub> O (2)                 | DMSO               | <i>o</i> Ph-PhCOOH (4)              | 48                 |
| 27        | 3/1        | 2.5 | Ag <sub>2</sub> O (2)                 | DMSO               | <i>o</i> Ph-PhCOOH (2)              | 57                 |
| 28        | 3/1        | 2.5 | Ag <sub>2</sub> O (2.5)               | DMSO               | <i>o</i> Ph-PhCOOH (2)              | 63                 |

|                 |       |     |                       |      |                        |    |
|-----------------|-------|-----|-----------------------|------|------------------------|----|
| 29              | 2.5/1 | 2.5 | Ag <sub>2</sub> O (3) | DMSO | <i>o</i> Ph-PhCOOH (2) | 61 |
| 30              | 2/1   | 2.5 | Ag <sub>2</sub> O (3) | DMSO | <i>o</i> Ph-PhCOOH (2) | 53 |
| 31 <sup>c</sup> | 3/1   | 2.5 | Ag <sub>2</sub> O (3) | DMSO | <i>o</i> Ph-PhCOOH (2) | 58 |

<sup>a</sup>Reaction conditions (unless otherwise specified): 0.3 mmol scale, Solvent (2 mL). <sup>b</sup>Isolated yield.  
<sup>c</sup>Reaction run at 90 °C.

**Figure S1. Structures of Thiophenes and Furans**

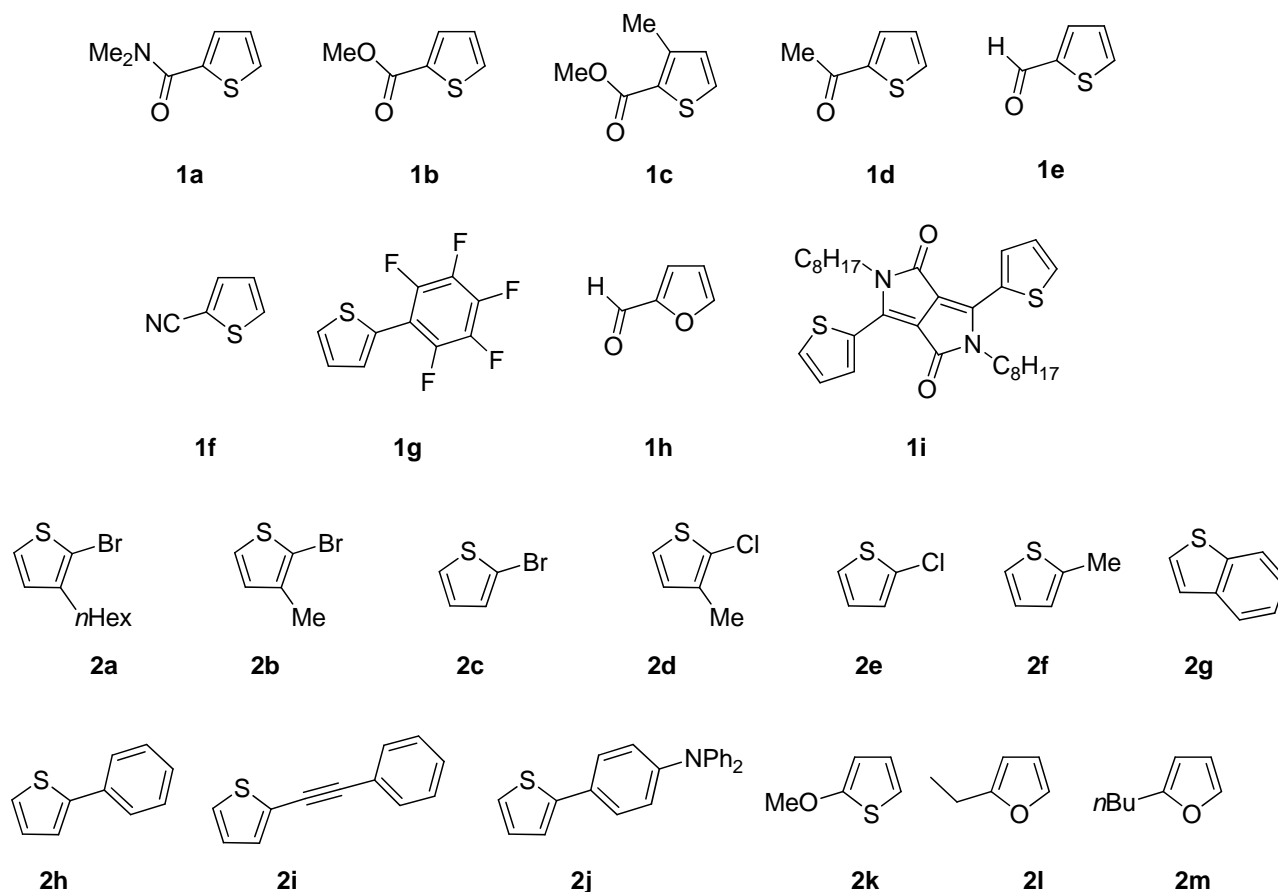

**Typical Procedure for Pd-Catalyzed Oxidative Cross-Coupling between Two Thiophenes.** To a 25 mL of Schlenk tube were added Pd(OAc)<sub>2</sub> (2.5 mol %), Ag<sub>2</sub>O (208 mg 3.0 equiv) and [1,1'-biphenyl]-2-carboxylic acid (119 mg, 2.0 equiv) under N<sub>2</sub>, followed by DMSO (2 mL) with stirring. Thiophene **1a** (0.9 mmol, 3 equiv) and thiophene **2a** (0.3 mmol, 1 equiv) were then added subsequently. The reaction mixture was stirred at 80 °C (oil bath). After stirring for 8 h, the reaction mixture was cooled to room temperature, diluted with ethyl acetate, washed with 1 N HCl and brine, dried over Na<sub>2</sub>SO<sub>4</sub>, filtered and concentrated. The residue was purified with silica gel chromatography to provide pure product.

**Note:** For compounds **3a**, **3m**, **3o-q**, the reaction was extracted with ethyl acetate, washed with 1 N NaOH, 1 N HCl and brine, dried over Na<sub>2</sub>SO<sub>4</sub>, filtered and concentrated.

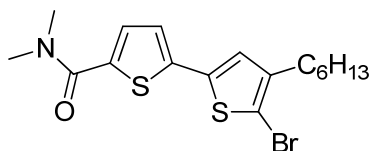

**5'-Bromo-4'-hexyl-N,N-dimethyl-[2,2'-bithiophene]-5-carboxamide (3a).** The product (85 mg, 71% yield) as a yellow solid was purified with silica gel chromatography (Petroleum ether /Ethyl Acetate = 2:1). m.p. 54 °C. <sup>1</sup>H NMR (300 MHz, CDCl<sub>3</sub>) δ 7.24 (d, *J* = 3.9 Hz, 1H), 7.00 (d, *J* = 3.9 Hz, 1H), 6.92 (s, 1H), 3.19 (s, 6H), 2.53 (t, *J* = 7.8 Hz, 2H), 1.57 (m, 2H), 1.32 (m, 6H), 0.89 (t, *J* = 6.6 Hz, 3H). <sup>13</sup>C NMR (75.4 MHz, CDCl<sub>3</sub>) δ 163.7, 143.1, 140.2, 136.4, 135.7, 130.0, 125.4, 122.9, 108.8, 31.5, 29.5, 29.4, 28.8, 22.5, 14.0. IR (thin film): ν<sub>max</sub> 3068, 1610 cm<sup>-1</sup>. MS (EI): *m/z* (%) 401 (M<sup>+</sup>), 399 (M<sup>+</sup>), 274 (100), 243, 171. HRMS: Calculated for C<sub>17</sub>H<sub>22</sub>NOS<sub>2</sub>Br: 399.0326; Found: 399.0331.

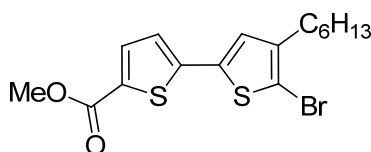

**Methyl 5'-bromo-4'-hexyl-[2,2'-bithiophene]-5-carboxylate (3b).** The product (81 mg, 70% yield) as a yellow liquid was purified with silica gel chromatography (Petroleum ether /Ethyl Acetate = 50:1) and then distilled under vacuum to get rid of starting material **1b**. <sup>1</sup>H NMR (300 MHz, CDCl<sub>3</sub>) δ 7.66 (d, *J* = 3.9 Hz, 1H), 7.03 (d, *J* = 3.9 Hz, 1H), 6.95 (s, 1H), 3.88 (s, 3H), 2.53 (t, *J* = 7.6 Hz, 2H), 1.57 (m, 2H), 1.32 (m, 6H), 0.89 (t, *J* = 6.4 Hz, 3H). <sup>13</sup>C NMR (75.4 MHz, CDCl<sub>3</sub>) δ 162.3, 143.4, 143.3, 135.6, 134.1, 131.3, 125.8, 123.6, 109.7, 52.2, 31.5, 29.51, 29.47, 28.8, 22.5, 14.0. IR (thin film): ν<sub>max</sub> 2952, 2927, 1716 cm<sup>-1</sup>. MS (EI): *m/z* (%) 388 (M<sup>+</sup>), 386 (M<sup>+</sup>), 237 (100). HRMS: Calculated for C<sub>16</sub>H<sub>19</sub>O<sub>2</sub>S<sub>2</sub>Br: 386.0010; Found: 386.0008.

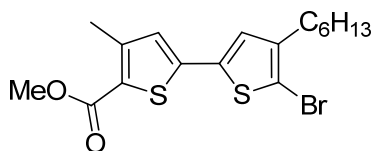

**Methyl 5'-bromo-4'-hexyl-4-methyl-[2,2'-bithiophene]-5-carboxylate (3c).** The product (77 mg, 64% yield) as a yellow liquid was purified with silica gel chromatography (Petroleum ether /Ethyl Acetate = 50:1) and then distilled under vacuum to get rid of starting material **1c**.  $^1\text{H}$  NMR (300 MHz,  $\text{CDCl}_3$ )  $\delta$  6.92 (s, 1H), 6.87 (s, 1H), 3.85 (s, 3H), 2.52 (t,  $J = 8.1$  Hz, 2H), 2.51 (s, 3H), 1.57 (m, 2H), 1.31 (m, 6H), 0.89 (t,  $J = 6.4$  Hz, 3H).  $^{13}\text{C}$  NMR (75.4 MHz,  $\text{CDCl}_3$ )  $\delta$  162.9, 147.1, 143.2, 140.5, 135.7, 127.5, 125.6, 124.4, 109.4, 51.7, 31.5, 29.44, 29.40, 28.8, 22.5, 16.0, 14.0. IR (thin film):  $\nu_{\text{max}}$  2953, 1713, 1466  $\text{cm}^{-1}$ . MS (EI):  $m/z$  (%) 402 ( $\text{M}^+$ ), 400 ( $\text{M}^+$ ), 251, 43(100). HRMS: Calculated for  $\text{C}_{17}\text{H}_{21}\text{O}_2\text{S}_2\text{Br}$ : 400.0166; Found: 400.0161.

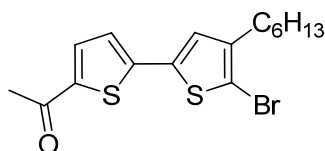

**1-(5'-Bromo-4'-hexyl-[2,2'-bithiophen]-5-yl)ethanone (3d).** 5% of  $\text{Pd}(\text{OAc})_2$  was used. The product (85 mg, 76%) as a yellow solid was purified with silica gel chromatography (Petroleum ether /Ethyl Acetate = 50:1) and then distilled under vacuum to get rid of starting material **1d**. m.p. 69  $^\circ\text{C}$ .  $^1\text{H}$  NMR (300 MHz,  $\text{CDCl}_3$ )  $\delta$  7.55 (d,  $J = 3.9$  Hz, 1H),  $\delta$  7.06 (d,  $J = 3.9$  Hz, 1H), 6.99 (s, 1H), 2.54 (t,  $J = 7.6$  Hz, 2H), 2.53 (s, 3H), 1.57 (m, 2H), 1.32 (m, 6H), 0.92 (t,  $J = 7.6$  Hz, 3H).  $^{13}\text{C}$  NMR (75.4 MHz,  $\text{CDCl}_3$ )  $\delta$  190.3, 145.0, 143.5, 142.4, 135.6, 133.2, 126.2, 123.9, 110.2, 31.5, 29.6, 29.5, 28.4, 26.5, 22.6, 14.1. IR (thin film):  $\nu_{\text{max}}$  2923, 1652  $\text{cm}^{-1}$ . MS (EI):  $m/z$  (%) 372 ( $\text{M}^+$ ), 370 ( $\text{M}^+$ ), 221, 43(100). HRMS: Calculated for  $\text{C}_{16}\text{H}_{19}\text{OS}_2\text{Br}$ : 370.0061; Found: 370.0065.

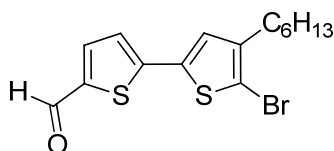

**5'-Bromo-4'-hexyl-[2,2'-bithiophene]-5-carbaldehyde (3e).** 5% of  $\text{Pd}(\text{OAc})_2$  was used. This compound is known.<sup>2</sup> The product (77 mg, 72% yield) as a yellow liquid was purified by silica chromatography (Petroleum ether /Ethyl Acetate = 50:1) and then distilled under vacuum to get rid of starting material **1e**.  $^1\text{H}$  NMR (300 MHz,  $\text{CDCl}_3$ )  $\delta$  9.85 (s, 1H), 7.64 (d,  $J = 4.0$  Hz, 1H),  $\delta$  7.14

(d,  $J = 4.0$  Hz, 1H), 7.03 (s, 1H), 2.54 (t,  $J = 7.6$  Hz, 2H), 1.58 (m, 2H), 1.32 (m, 6H), 0.89 (t,  $J = 6.2$  Hz, 3H).  $^{13}\text{C}$  NMR (75.4 MHz,  $\text{CDCl}_3$ )  $\delta$  182.4, 146.2, 143.6, 141.6, 137.2, 135.3, 126.7, 124.0, 110.9, 31.5, 29.5, 29.4, 28.8, 22.5, 14.0. IR (thin film):  $\nu_{\text{max}}$  2954, 1664, 1460  $\text{cm}^{-1}$ . MS (EI):  $m/z$  (%) 358 ( $\text{M}^+$ ), 356 ( $\text{M}^+$ ), 207 (100), 43. HRMS: Calculated for  $\text{C}_{15}\text{H}_{17}\text{OBrS}_2$ : 355.9904; Found: 355.9901.

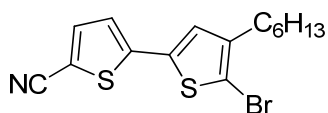

**5'-Bromo-4'-hexyl-[2,2'-bithiophene]-5-carbonitrile (3f).** The product (56 mg, 53%) as a yellow solid was purified by silica chromatography (Petroleum ether /Ethyl Acetate = 50:1). m.p. 49 °C.  $^1\text{H}$  NMR (300 MHz,  $\text{CDCl}_3$ )  $\delta$  7.50 (d,  $J = 4.0$  Hz, 1H),  $\delta$  7.03 (d,  $J = 4.0$  Hz, 1H), 6.96 (s, 1H), 2.54 (t,  $J = 7.6$  Hz, 2H), 1.58 (m, 2H), 1.32 (m, 6H), 0.90 (t,  $J = 6.0$  Hz, 3H).  $^{13}\text{C}$  NMR (75.4 MHz,  $\text{CDCl}_3$ )  $\delta$  143.8, 143.6, 138.2, 134.1, 126.6, 123.2, 114.0, 110.7, 107.5, 31.5, 29.52, 29.46, 28.8, 22.5, 14.0. IR (thin film):  $\nu_{\text{max}}$  2922, 2852, 2222, 1580, 1457  $\text{cm}^{-1}$ . MS (EI):  $m/z$  (%) 355 ( $\text{M}^+$ ), 353 ( $\text{M}^+$ ), 204, 86, 84 (100). HRMS: Calculated for  $\text{C}_{15}\text{H}_{16}\text{NS}_2\text{Br}$ : 352.9908; Found: 352.9906

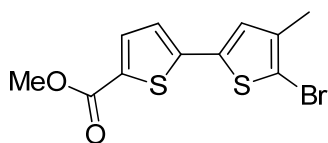

**Methyl 5'-bromo-4'-methyl-[2,2'-bithiophene]-5-carboxylate (3g).** The product (67 mg, 71% yield) as a yellow solid was purified with silica gel chromatography (Petroleum ether /Ethyl Acetate = 50:1) and then distilled under vacuum to get rid of starting material **1b**. m.p. 90 °C.  $^1\text{H}$  NMR (300 MHz,  $\text{CDCl}_3$ )  $\delta$  7.65 (d,  $J = 3.8$  Hz, 1H), 7.02 (d,  $J = 3.8$  Hz, 1H), 6.95 (s, 1H), 3.88 (s, 3H), 2.18 (s, 3H).  $^{13}\text{C}$  NMR (100 MHz,  $\text{CDCl}_3$ )  $\delta$  162.3, 143.2, 138.4, 135.4, 134.2, 131.3, 126.8, 123.7, 110.1, 52.2, 15.2. IR (thin film):  $\nu_{\text{max}}$  2921, 2850, 1717, 1470  $\text{cm}^{-1}$ . MS (EI):  $m/z$  (%) 318 ( $\text{M}^+$ ), 316 ( $\text{M}^+$ , 100), 287, 285, 213. HRMS: Calculated for  $\text{C}_{11}\text{H}_9\text{O}_2\text{S}_2\text{Br}$ : 315.9227; Found: 315.9226.



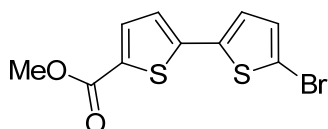

**Methyl 5'-bromo-[2,2'-bithiophene]-5-carboxylate (3h).** The product (55 mg, 62% yield) as a yellow solid was purified with silica gel chromatography (Petroleum ether /Ethyl Acetate = 50:1) and then distilled under vacuum to get rid of starting material **1b**. This compound is known.<sup>3</sup> m.p. 108 °C. <sup>1</sup>H NMR (300 MHz, CDCl<sub>3</sub>) δ 7.68 (d, *J* = 3.9 Hz, 1H), 7.08 (d, *J* = 3.9 Hz, 1H), 7.02 (d, *J* = 3.9 Hz, 1H), 7.01 (d, *J* = 3.9 Hz, 1H), 3.89 (s, 3H).

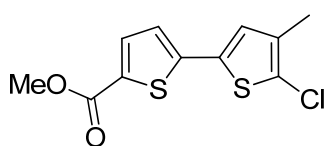

**Methyl 5'-chloro-4'-methyl-[2,2'-bithiophene]-5-carboxylate (3i).** The product (57 mg, 70% yield) as a yellow solid was purified with silica gel chromatography (Petroleum ether /Ethyl Acetate = 50:1) and then distilled under vacuum to get rid of starting material **1b**. m.p. 86 °C. <sup>1</sup>H NMR (400 MHz, CDCl<sub>3</sub>) δ 7.64 (d, *J* = 4.0 Hz, 1H), 7.00 (d, *J* = 4.0 Hz, 1H), 6.92 (s, 3H), 3.87 (s, 3H), 2.16 (s, 3H). <sup>13</sup>C NMR (100 MHz, CDCl<sub>3</sub>) δ 162.3, 143.3, 135.5, 134.1, 132.2, 131.3, 126.5, 125.5, 123.6, 52.2, 13.5. IR (thin film): ν<sub>max</sub> 2924, 1708 cm<sup>-1</sup>. MS (EI): *m/z* (%) 274 (M<sup>+</sup>), 272 (M<sup>+</sup>, 100), 243, 241, 169. HRMS: Calculated for C<sub>11</sub>H<sub>9</sub>O<sub>2</sub>S<sub>2</sub>Cl: 271.9733; Found: 271.9738.

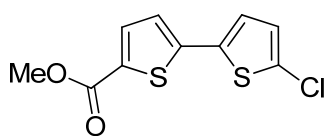

**Methyl 5'-chloro-[2,2'-bithiophene]-5-carboxylate (3j).** The product (48 mg, 61% yield) as a yellow solid was purified with silica gel chromatography (Petroleum ether /Ethyl Acetate = 50:1) and then distilled under vacuum to get rid of starting material **1b**. This compound is known.<sup>4</sup> m.p. 87 °C. <sup>1</sup>H NMR (300 MHz, CDCl<sub>3</sub>) δ 7.67 (d, *J* = 3.9 Hz, 1H), 7.05 (d, *J* = 3.9 Hz, 1H), 7.03 (d, *J* = 3.9 Hz, 1H), 6.86 (d, *J* = 3.9 Hz, 1H), 3.89 (s, 3H). <sup>13</sup>C NMR (75.4 MHz, CDCl<sub>3</sub>) δ 162.3, 143.0, 134.2, 131.6, 130.6, 127.2, 124.3, 123.9, 52.3. IR (thin film): ν<sub>max</sub> 2919, 1717 cm<sup>-1</sup>. MS (EI): *m/z* (%) 260 (M<sup>+</sup>), 258 (M<sup>+</sup>), 229, 227 (100), 155, 157. HRMS: Calculated for C<sub>10</sub>H<sub>7</sub>O<sub>2</sub>S<sub>2</sub>Cl: 257.9576; Found: 257.9578.

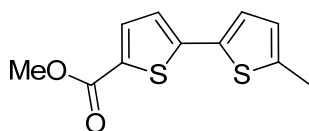

**Methyl 5'-methyl-[2,2'-bithiophene]-5-carboxylate (3k).** The product (38 mg, 53% yield) as a yellow solid was purified with silica gel chromatography (Petroleum ether /Ethyl Acetate = 50:1) and then distilled under vacuum to get rid of starting material **1b**. This compound is known.<sup>5</sup> m.p. 106 °C. <sup>1</sup>H NMR (400 MHz, CDCl<sub>3</sub>) δ 7.67 (d, *J* = 3.8 Hz, 1H), 7.07 (d, *J* = 3.6 Hz, 1H), 7.05 (d, *J* = 3.8 Hz, 1H), 6.69 (m, 1H), 3.88 (s, 3H), 2.49 (s, 3H). <sup>13</sup>C NMR (75.4 MHz, CDCl<sub>3</sub>) δ 162.6, 144.7, 141.2, 134.2, 133.9, 130.4, 126.3, 125.2, 123.1, 52.1, 15.4. IR (thin film):  $\nu_{\max}$  2917, 1708 cm<sup>-1</sup>. MS (EI): *m/z* (%) 238 (M<sup>+</sup>, 100), 207, 179, 135. HRMS: Calculated for C<sub>11</sub>H<sub>10</sub>O<sub>2</sub>S<sub>2</sub>: 238.0122; Found: 238.0126.

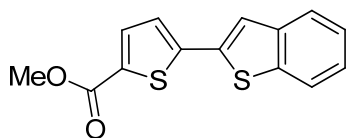

**Methyl 5-(benzo[b]thiophen-2-yl)thiophene-2-carboxylate (3l).** The product (49 mg, 60% yield) as a yellow solid was purified with silica gel chromatography (Petroleum ether /Ethyl Acetate = 50:1) and then distilled under vacuum to get rid of starting material **1b**. This compound is known.<sup>4</sup> m.p. 139 °C. <sup>1</sup>H NMR (300 MHz, CDCl<sub>3</sub>) δ 7.76 (m, 2H), 7.72 (d, *J* = 4.0 Hz, 1H), 7.49 (s, 1H), 7.35 (m, 2H), 7.24 (d, *J* = 4.0 Hz, 1H), 3.90 (s, 3H). <sup>13</sup>C NMR (75.4 MHz, CDCl<sub>3</sub>) δ 162.4, 144.0, 140.0, 139.5, 135.9, 134.2, 132.3, 125.2, 125.1, 124.9, 123.9, 122.2, 121.4, 52.3. IR (thin film):  $\nu_{\max}$  2918, 2849, 1716 cm<sup>-1</sup>. MS (EI): *m/z* (%) 275 (M<sup>+</sup> + H<sup>+</sup>), 274 (M<sup>+</sup>, 100), 243, 171, 149. HRMS: Calculated for C<sub>14</sub>H<sub>10</sub>O<sub>2</sub>S<sub>2</sub>: 274.0122; Found: 274.0121.

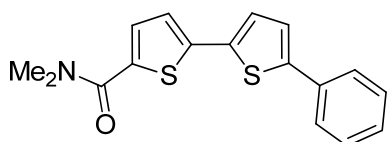

***N,N*-dimethyl-5'-phenyl-[2,2'-bithiophene]-5-carboxamide (3m).** The product (60 mg, 64%) as a yellow solid was purified with silica gel chromatography (Petroleum ether /Ethyl Acetate = 2:1). m.p. 172 °C. <sup>1</sup>H NMR (300 MHz, CDCl<sub>3</sub>) δ 7.61 (d, *J* = 7.5 Hz, 2H), 7.39 (t, *J* = 7.2 Hz, 2H), 7.32-7.21 (m, 4H), 7.12 (d, *J* = 3.6 Hz, 1H), 3.22(s, 6H). <sup>13</sup>C NMR (75.4 MHz, CDCl<sub>3</sub>) δ 163.8,

144.2, 140.8, 136.2, 135.5, 133.7, 130.2, 128.8, 127.7, 125.5, 123.8, 122.8. IR (thin film):  $\nu_{\max}$  3108, 1601, 1407  $\text{cm}^{-1}$ . MS (EI):  $m/z$  (%) 314 ( $\text{M}^+ + \text{H}^+$ ), 313 ( $\text{M}^+$ ), 269 (100), 197. HRMS: Calculated for  $\text{C}_{17}\text{H}_{15}\text{NOS}_2$ : 313.0595; Found: 313.0590.

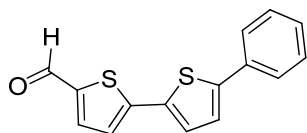

**5'-Phenyl-[2,2'-bithiophene]-5-carbaldehyde (3n).** The product (53 mg, 65%) as a yellow solid was purified with silica gel chromatography (Petroleum ether /Ethyl Acetate = 50:1). m.p. 121 °C.  $^1\text{H}$  NMR (300 MHz,  $\text{CDCl}_3$ )  $\delta$  9.87 (s, 1H), 7.69 (d,  $J = 3.9$  Hz 1H), 7.62 (d,  $J = 6.9$  Hz 2H), 7.42 (t,  $J = 7.0$  Hz 2H), 7.35 (d,  $J = 3.9$  Hz 2H), 7.28 (t,  $J = 3.6$  Hz, 2H).  $^{13}\text{C}$  NMR (75.4 MHz,  $\text{CDCl}_3$ )  $\delta$  182.4, 147.2, 146.1, 141.5, 137.4, 135.0, 133.4, 129.0, 128.2, 127.1, 125.8, 124.2, 124.0. MS (EI):  $m/z$  (%) 270 ( $\text{M}^+$ , 100) 241, 197. HRMS: Calculated for  $\text{C}_{15}\text{H}_{10}\text{OS}_2$ : 270.0173; Found: 270.0175.

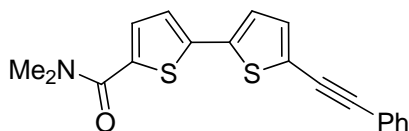

***N,N*-dimethyl-5'-(phenylethynyl)-[2,2'-bithiophene]-5-carboxamide (3o).** The product (53 mg, 52% yield) as a yellow solid was purified with silica gel chromatography (Petroleum ether /Ethyl ether = 2:1). m.p. 124 °C;  $^1\text{H}$  NMR (300 MHz,  $\text{CDCl}_3$ )  $\delta$  7.52 (m, 2H), 7.36 (m, 3H), 7.28 (d,  $J = 3.6$  Hz, 1H), 7.20 (d,  $J = 3.6$  Hz, 1H), 7.15-7.10 (m, 2H), 3.21 (s, 6H).  $^{13}\text{C}$  NMR (75.4 MHz,  $\text{CDCl}_3$ )  $\delta$  163.6, 139.9, 137.6, 136.9, 132.8, 131.3, 130.0, 128.5, 128.3, 124.5, 123.4, 123.0, 122.5, 94.6, 82.3. IR (thin film):  $\nu_{\max}$  3062, 2915, 2180, 1595  $\text{cm}^{-1}$ . MS (EI):  $m/z$  (%) 338 ( $\text{M}^+ + \text{H}^+$ ), 337 ( $\text{M}^+$ ), 293, 221, 43 (100). HRMS: Calculated for  $\text{C}_{19}\text{H}_{15}\text{NOS}_2$ : 337.0595; Found: 337.0592.

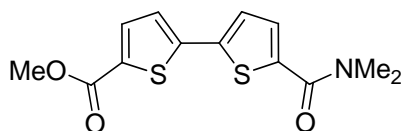

**Methyl 5'-(dimethylcarbamoyl)-[2,2'-bithiophene]-5-carboxylate (3p).** 3 equiv of **1a** was used. The product (61 mg, 69% yield) as a yellow solid was purified with silica gel chromatography (Petroleum ether /Ethyl Acetate = 2:1). m.p. 163 °C;  $^1\text{H}$  NMR (300 MHz,  $\text{CDCl}_3$ )  $\delta$  7.70 (d,  $J = 3.6$

Hz, 1H), 7.28 (d,  $J = 3.6$  Hz, 1H), 7.19 (dd,  $J = 3.6$  Hz, 1.5 Hz, 2H), 3.90 (s, 3H), 3.20 (s, 6H).  $^{13}\text{C}$  NMR (75.4 MHz,  $\text{CDCl}_3$ )  $\delta$  163.5, 162.3, 142.9, 139.4, 138.1, 134.2, 132.3, 130.0, 124.8, 124.5, 52.2. IR (thin film):  $\nu_{\text{max}}$  2922, 1707, 1695  $\text{cm}^{-1}$ . MS (EI):  $m/z$  (%) 295 ( $\text{M}^+$ ), 251 (100), 179. HRMS: Calculated for  $\text{C}_{13}\text{H}_{13}\text{NO}_3\text{S}_2$ : 295.0337; Found: 295.0335.

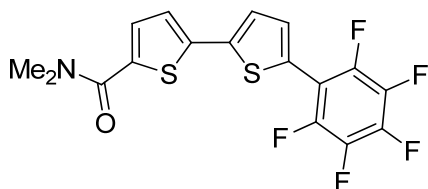

***N,N*-Dimethyl-5'-(perfluorophenyl)-[2,2'-bithiophene]-5-carboxamide (3q).** 3 equiv of **1a** was used. The product (72 mg, 60% yield) as a yellow solid was purified with silica gel chromatography (Petroleum ether /Ethyl Acetate = 2:1). m.p. 185 °C;  $^1\text{H}$  NMR (400 MHz,  $\text{CDCl}_3$ )  $\delta$  7.44 (d,  $J = 3.8$  Hz, 1H), 7.26 (d,  $J = 3.8$  Hz, 1H), 7.24 (d,  $J = 3.8$  Hz, 1H), 7.13 (d,  $J = 3.8$  Hz, 1H), 3.18 (s, 6H).  $^{13}\text{C}$  NMR (100 MHz,  $\text{CDCl}_3$ )  $\delta$  163.6, 143.9 (dm,  $J = 251.6$  Hz), 139.9 (dm,  $J = 257.0$  Hz), 139.5, 139.0(t,  $J = 4.1$  Hz), 138.0 (dm,  $J = 255.7$  Hz), 137.5, 131.1(t,  $J = 5.4$  Hz), 126.1 (m), 124.7, 123.9, 109.5(dt,  $J = 4.1, 10.7$  Hz), 37.4;  $^{19}\text{F}$  NMR (282 MHz,  $\text{CDCl}_3$ )  $\delta$  -139.1 (m, 2F), -154.9 (m, 1F), -161.3 (m, 2F). IR (thin film):  $\nu_{\text{max}}$  2920, 1602, 1526, 1490  $\text{cm}^{-1}$ . MS (EI):  $m/z$  (%) 403 ( $\text{M}^+$ ), 359 (100), 287. HRMS: Calculated for  $\text{C}_{17}\text{H}_{10}\text{NOS}_2\text{F}_5$ : 403.0124; Found: 403.0127.

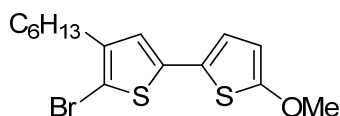

**5-Bromo-4-hexyl-5'-methoxy-2,2'-bithiophene (3r).** The reaction was run in a sealed tube with 3 equiv of **2j**. The product (60 mg, 56% yield) as a yellow liquid was purified with silica gel chromatography (Petroleum ether(100%)).  $^1\text{H}$  NMR (300 MHz,  $\text{CDCl}_3$ )  $\delta$  6.72 (d,  $J = 3.9$  Hz, 1H), 6.69 (s, 1H), 6.10 (d,  $J = 3.9$  Hz, 1H), 3.90 (s, 3H), 2.52 (t,  $J = 7.6$  Hz, 2H), 1.58 (m, 2H), 1.32 (m, 6H), 0.91 (t,  $J = 5.8$  Hz, 3H).  $^{13}\text{C}$  NMR (75.4 MHz,  $\text{CDCl}_3$ )  $\delta$  165.6, 142.6, 137.4, 123.1, 123.0, 121.4, 106.1, 104.3, 60.2, 31.6, 29.6, 29.55, 28.9, 22.6, 14.1. IR (thin film):  $\nu_{\text{max}}$  2955, 1539, 1499  $\text{cm}^{-1}$ . MS (EI):  $m/z$  (%) 360 ( $\text{M}^+ + \text{H}^+$ ), 358 ( $\text{M}^+$ ), 345, 343, 84 (100). HRMS: Calculated for  $\text{C}_{15}\text{H}_{19}\text{OBrS}_2$ : 358.0061; Found: 358.0057.

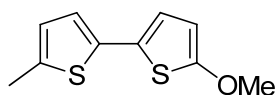

**5-Methoxy-5'-methyl-2,2'-bithiophene (3s).** The reaction was run in a sealed tube with 3 equiv of **2f**. The product (27 mg, 44% yield) as a yellow liquid was purified with silica gel chromatography (Petroleum ether(100%).  $^1\text{H}$  NMR (300 MHz,  $\text{CDCl}_3$ )  $\delta$  6.80 (d,  $J = 3.2$  Hz, 1H), 6.71(d,  $J = 4.0$  Hz, 1H), 6.62 (d,  $J = 3.2$  Hz, 1H), 6.10 (d,  $J = 4.0$  Hz, 1H), 3.90 (s, 3H), 2.46 (s, 3H).  $^{13}\text{C}$  NMR (75.4 MHz,  $\text{CDCl}_3$ )  $\delta$  165.0, 138.0, 135.6, 125.6, 124.2, 122.1, 120.5, 104.2, 60.2, 15.3. IR (thin film):  $\nu_{\text{max}}$  2921, 2851, 1540, 1507  $\text{cm}^{-1}$ . MS (EI):  $m/z$  (%) 211 ( $\text{M}^+ + \text{H}^+$ ), 210 ( $\text{M}^+$ ), 195 (100), 167. HRMS: Calculated for  $\text{C}_{10}\text{H}_{10}\text{OS}_2$ : 210.0173; Found: 210.0175.

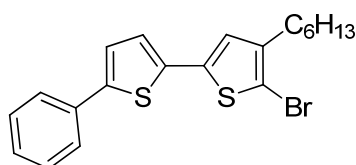

**5-Bromo-4-hexyl-5'-phenyl-2,2'-bithiophene (3t).** The product (80 mg, 66% yield) as a yellow solid was purified with silica gel chromatography (Petroleum ether(100%)) and then distilled under vacuum to get rid of starting material **2h**. m.p. 50 °C.  $^1\text{H}$  NMR (400 MHz,  $\text{CDCl}_3$ )  $\delta$  7.57 (d,  $J = 7.6$  Hz, 2H), 7.36 (t,  $J = 7.2$  Hz, 2H), 7.27 (t,  $J = 7.2$  Hz, 1H), 7.18 (d,  $J = 3.2$  Hz, 1H), 7.03 (d,  $J = 3.2$  Hz, 1H), 6.87 (s, 1H), 2.53 (t,  $J = 7.2$  Hz, 2H), 1.59 (m, 2H), 1.33 (m, 6H), 0.93 (s, 3H).  $^{13}\text{C}$  NMR (100.5 MHz,  $\text{CDCl}_3$ )  $\delta$  143.2, 142.9, 136.7, 135.9, 133.8, 128.9, 127.6, 125.5, 124.4, 124.2, 123.6, 107.6, 31.6, 29.6, 29.5, 28.9, 22.6, 14.1. MS (EI):  $m/z$  (%) 406 ( $\text{M}^+$ ), 404 ( $\text{M}^+$ ), 255 (100), 160. HRMS: Calculated for  $\text{C}_{20}\text{H}_{21}\text{S}_2\text{Br}$ : 404.0268; Found: 404.0267.

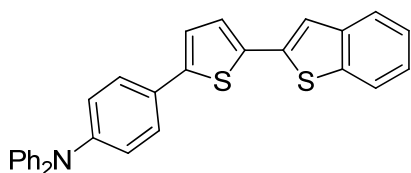

**4-(5-(benzo[b]thiophen-2-yl)thiophen-2-yl)-N,N-diphenylaniline (3u).** The product (73 mg, 53% yield) as a yellow solid was purified with silica gel chromatography (Petroleum ether: /Ethyl Acetate = 100:1). m.p. 196 °C.  $^1\text{H}$  NMR (400 MHz,  $\text{CDCl}_3$ )  $\delta$  7.77 (d,  $J = 7.8$  Hz, 1H), 7.71 (d,  $J = 7.8$  Hz, 1H), 7.47 (d,  $J = 8.4$  Hz, 2H), 7.39 (s, 1H), 7.35-7.23 (m, 7H), 7.16-7.12 (m, 5H), 7.08-7.03

(m, 4H).  $^{13}\text{C}$  NMR (150.8 MHz,  $\text{CDCl}_3$ )  $\delta$  147.5, 147.3, 144.3, 140.4, 138.9, 137.3, 135.6, 129.3, 127.7, 126.4, 126.0, 124.7, 124.6, 124.4, 123.4, 123.3, 123.2, 122.8, 122.0, 119.2. MS (EI):  $m/z$  (%) 459( $\text{M}^+$ ), 266, 105 (100). HRMS: Calculated for  $\text{C}_{30}\text{H}_{21}\text{NS}_2$ : 459.1115; Found: 459.1114

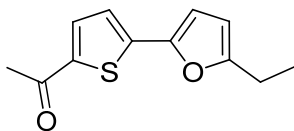

**1-(5-(5-Ethylfuran-2-yl)thiophen-2-yl)ethanone (3v).** To a 25 mL of sealed tube were added  $\text{Pd}(\text{TFA})_2$  (10 mol %),  $\text{AgOAc}$  (150 mg 3.0 equiv) and 1.10-phen (10.8 mg, 0.2 equiv) under  $\text{N}_2$ , followed by DMA (0.5 mL), DMSO (1.5 mL) with stirring. Thiophene **1e** (0.3 mmol, 1 equiv) and furan **2k** (0.9 mmol, 3 equiv) were then added subsequently. The reaction mixture was stirred at 100  $^\circ\text{C}$  (oil bath). After stirring for 8 h, the reaction mixture was cooled to room temperature, diluted with ethyl acetate, filtered, washed with brine, dried over  $\text{Na}_2\text{SO}_4$ , and concentrated. The residue was purified with silica gel chromatography (Petroleum ether /Ethyl Acetate = 50:1) to provide pure product (33 mg, 50% yield) as a pale yellow solid. m.p. 55  $^\circ\text{C}$ .  $^1\text{H}$  NMR (300 MHz,  $\text{CDCl}_3$ )  $\delta$  7.58 (d,  $J = 3.9$  Hz, 1H), 7.17 (d,  $J = 3.9$  Hz, 1H), 6.59 (d,  $J = 3.3$  Hz, 1H), 6.08 (d,  $J = 3.3$  Hz, 1H), 2.70 (q,  $J = 7.5$  Hz, 2H), 2.54 (s, 3H), 1.27 (t,  $J = 7.5$  Hz, 3H).  $^{13}\text{C}$  NMR (75.4 MHz,  $\text{CDCl}_3$ )  $\delta$  190.4, 159.1, 146.7, 142.2, 141.3, 133.3, 121.8, 109.0, 106.8, 26.5, 21.5, 12.0. IR (thin film):  $\nu_{\text{max}}$  1647  $\text{cm}^{-1}$ . MS (EI):  $m/z$  (%) 220 ( $\text{M}^+$ ), 205 (100). HRMS: Calculated for  $\text{C}_{12}\text{H}_{12}\text{O}_2\text{S}$ : 220.0558; Found: 220.0560.

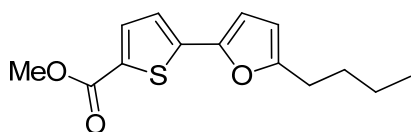

**1-(5-(5-Butylfuran-2-yl)thiophen-2-yl)ethanone (3w).** To a 25 mL of sealed tube were added  $\text{Pd}(\text{TFA})_2$  (10 mol %),  $\text{AgOAc}$  (150 mg 3.0 equiv) and 1.10-phen (10.8 mg, 0.2 equiv) under  $\text{N}_2$ , followed by DMA (0.5 mL), DMSO (1.5 mL) with stirring. Thiophene **1b** (0.3 mmol, 1 equiv) and furan **2l** (0.9 mmol, 3 equiv) were then added subsequently. The reaction mixture was stirred at 100  $^\circ\text{C}$  (oil bath). After stirring for 8 h, the reaction mixture was cooled to room temperature, diluted with ethyl acetate, filtered, washed with brine, dried over  $\text{Na}_2\text{SO}_4$ , and concentrated. The residue

was purified with silica gel chromatography (Petroleum ether /Ethyl Acetate = 50:1) to provide pure product (39 mg, 49% yield) as a pale yellow oil.  $^1\text{H}$  NMR (400 MHz,  $\text{CDCl}_3$ )  $\delta$  7.68 (d,  $J = 4.0$  Hz, 1H), 7.13 (d,  $J = 4.0$  Hz, 1H), 6.54 (d,  $J = 3.2$  Hz, 1H), 6.06 (d,  $J = 3.2$  Hz, 1H), 3.88 (s, 3H), 2.66 (t,  $J = 7.8$  Hz, 2H), 1.65 (m, 2H), 1.40 (m, 2H), 0.94 (t,  $J = 7.4$  Hz, 3H).  $^{13}\text{C}$  NMR (100 MHz,  $\text{CDCl}_3$ )  $\delta$  162.7, 157.6, 146.7, 140.7, 134.1, 130.1, 121.5, 108.2, 107.3, 52.0, 30.0, 27.8, 22.2, 13.7. MS (EI):  $m/z$  (%) 264 ( $\text{M}^+$ ), 221 (100). HRMS: Calculated for  $\text{C}_{14}\text{H}_{16}\text{O}_3\text{S}$ : 264.0820; Found: 264.0818.

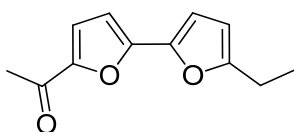

**1-(5'-Ethyl-[2,2'-bifuran]-5-yl)ethanone (3x).** The product (15 mg, 25% yield) as a pale yellow solid was purified with silica gel chromatography (Petroleum ether /Ethyl Acetate = 50:1). m.p. 81 °C.  $^1\text{H}$  NMR (300 MHz,  $\text{CDCl}_3$ )  $\delta$  7.22 (d,  $J = 3.9$  Hz, 1H), 6.75 (d,  $J = 3.3$  Hz, 1H), 6.59 (d,  $J = 3.9$  Hz, 1H), 6.11 (d,  $J = 3.9$  Hz, 1H), 2.71 (q,  $J = 7.6$  Hz, 2H), 2.48 (s, 3H), 1.27 (t,  $J = 7.6$  Hz, 3H);  $^{13}\text{C}$  NMR (75.4 MHz,  $\text{CDCl}_3$ )  $\delta$  186.0, 159.6, 151.0, 150.4, 143.5, 119.7, 109.6, 106.6, 106.2, 25.9, 21.5, 12.0. IR (thin film):  $\nu_{\text{max}}$  2918, 1652, 1540  $\text{cm}^{-1}$ . MS (EI):  $m/z$  (%) 204 ( $\text{M}^+$ ), 189 (100), 133, 86, 84. HRMS: Calculated for  $\text{C}_{12}\text{H}_{12}\text{O}_3$ : 204.0786; Found: 204.0784.

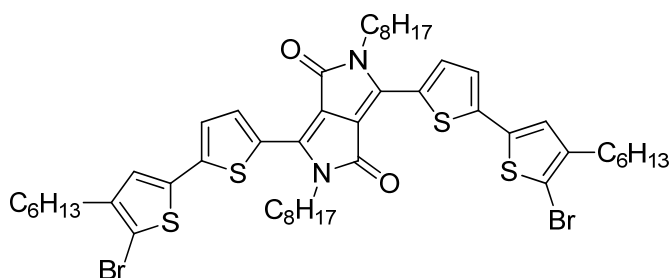

**3,6-bis(5'-bromo-4'-hexyl-[2,2'-bithiophen]-5-yl)-2,5-dioctylpyrrolo[3,4-c]pyrrole-1,4(2H,5H)-dione (3y).** The reaction was run on a 0.1 mmol scale in 3 mL DMSO and 5 mol %  $\text{Pd}(\text{OAc})_2$  was used. The product **3y** (42 mg, 41% yield) as a purple-black solid was purified with silica gel chromatography (Petroleum ether/dichloromethane = 8:1). m.p. 157 °C.  $^1\text{H}$  NMR (400 MHz,  $\text{CDCl}_3$ )  $\delta$  8.84 (br, 2H), 7.19 (d,  $J = 3.6$  Hz, 2H), 6.99 (br, 2H), 4.05 (t,  $J = 8.0$  Hz, 4H), 2.55 (t,  $J = 7.6$  Hz, 4H), 1.73 (m, 4H), 1.60 (m, 4H), 1.43-1.25 (m, 30H), 0.92-0.85 (m, 12H).  $^{13}\text{C}$  NMR (150 MHz,  $\text{CDCl}_3$ )  $\delta$  161.0, 143.5, 141.9, 138.8, 136.3, 135.5, 128.1, 125.8, 124.6, 110.0, 108.2, 42.2, 31.8,

31.6, 30.0, 29.7, 29.6, 29.20, 29.19, 28.9, 26.9, 22.7, 22.62, 22.60, 14.1. MS (MALDI):  $m/z$  (%) 1018 ( $M^+$ ), 1017 ( $M^+$ ), 1016 ( $M^+$ ), 1014 ( $M^+$ ), 1012 ( $M^+$ ). HRMS (MALDI): Calculated for  $C_{50}H_{66}O_2N_2S_4Br_2$ : 1012.2368; Found: 1012.2362.

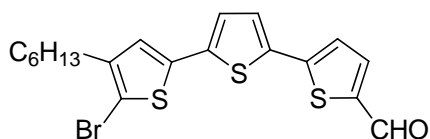

**5''-Bromo-4''-hexyl-[2,2':5',2''-terthiophene]-5-carbaldehyde (5).** 3 equiv of **2a** and 5 mol% of  $Pd(OAc)_2$  were used. The product (93 mg, 71% yield (0.3 mmol scale); 534 mg, 68% yield (1.8 mmol scale in 5 mL DMSO)) as a yellow solid was purified with silica gel chromatography (Petroleum ether/ Ethyl Acetate = 50:1) and then distilled under vacuum to get rid of starting material **4**. This compound is known.<sup>2</sup>  $^1H$  NMR (300 MHz,  $CDCl_3$ )  $\delta$  9.85 (s, 1H), 7.65 (d,  $J = 3.8$  Hz, 1H),  $\delta$  7.22 (d,  $J = 3.8$  Hz, 1H), 7.20 (d,  $J = 3.8$  Hz, 1H),  $\delta$  7.01 (d,  $J = 3.8$  Hz, 1H), 6.89 (s, 1H), 2.53 (t,  $J = 7.6$  Hz, 2H), 1.58 (m, 2H), 1.33 (m, 6H), 0.90 (t,  $J = 6.6$  Hz, 3H).  $^{13}C$  NMR (75.4 MHz,  $CDCl_3$ )  $\delta$  182.3, 146.5, 143.2, 141.6, 138.3, 137.3, 135.7, 134.5, 126.8, 125.1, 124.4, 124.0, 108.8, 31.5, 29.54, 29.50, 28.8, 22.5, 14.0. IR (thin film):  $\nu_{max}$  2925, 2854, 1663, 1507, 1464, 1440  $cm^{-1}$ . MS (EI):  $m/z$  (%) 440 ( $M^+$ ), 438 ( $M^+$ ), 289, 194, 57 (100). HRMS: Calculated for  $C_{19}H_{19}OBrS_3$ : 437.9781; Found: 437.9778.

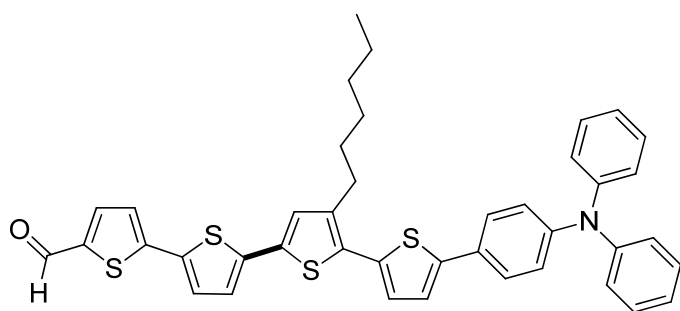

**5'''-(4-(diphenylamino)phenyl)-4''-hexyl-[2,2':5',2''':5'',2'''-quaterthiophene]-5-carbaldehyde (6).** To a 25 mL of Schlenk tube were added  $Pd(OAc)_2$  (6.0 mg, 5 mol%),  $PPh_3$  (13.1 mg 10 mol%),  $K_2CO_3$  (138 mg 2.0 equiv), **5** (220 mg, 1.0 equiv) and **2r** (250 mg, 1.5 equiv) under  $N_2$ . DMF (2.5 mL) was then added. The reaction mixture was stirred at 80 °C (oil bath). After stirring for 8 h, the reaction mixture was cooled to room temperature, diluted with  $CH_2Cl_2$ , filtered, washed with brine, dried over  $Na_2SO_4$ , and concentrated. The residue was purified with silica gel



chromatography (Petroleum ether/ Ethyl Acetate = 50:1) to give pure product (253 mg, 74% yield) as a deep brown solid.  $^1\text{H}$  NMR (400 MHz,  $\text{CDCl}_3$ )  $\delta$  9.83 (s, 1H), 7.63 (d,  $J = 4.0$  Hz, 1H), 7.45 (d,  $J = 8.2$  Hz, 2H), 7.28-7.23 (m, 5H), 7.19 (d,  $J = 4.0$  Hz, 1H), 7.10-7.15 (m, 5H), 7.00-7.07 (m, 7H), 2.76 (br, 2H), 1.66 (m, 2H), 1.39 (m, 2H), 1.32 (m, 4H), 0.89 (t,  $J = 6.8$  Hz, 3H).  $^{13}\text{C}$  NMR (150 MHz,  $\text{CDCl}_3$ )  $\delta$  182.2, 147.34, 147.28, 146.7, 144.1, 141.4, 140.1, 138.9, 137.2, 134.1, 134.0, 133.5, 131.0, 129.2, 127.8, 127.3, 126.7, 126.3, 124.5, 124.2, 123.8, 123.4, 123.1, 122.5, 31.6, 30.4, 29.5, 29.2, 22.6, 14.1. MS (MALDI):  $m/z$  (%) 685.2 ( $\text{M}^+$ ,100), 614.1, 581.1 HRMS: Calculated for  $\text{C}_{41}\text{H}_{35}\text{NOS}_4$ : 685.1601; Found: 685.1585.

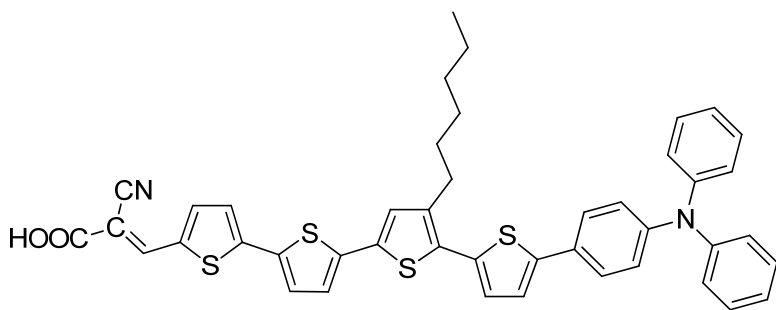

**2-cyano-3-(5'''-(4-(diphenylamino)phenyl)-4''-hexyl-[2,2':5',2'':5'',2'''-quaterthiophen]-5-yl)acrylic (7).** A solution of **6** (150 mg, 0.22 mmol), 2-cyanoacetic acid (94 mg, 5.0 equiv) and ammonium acetate (51 mg, 3.0 equiv) in acetic acid (25 mL) was refluxed for 3 h in a flask. After cooled to room temperature, the reaction was quenched with water and extracted with  $\text{CH}_2\text{Cl}_2$ . The organic layer was washed with water, dried over  $\text{Na}_2\text{SO}_4$ . After filtration, the product (161 mg, 98% yield) was obtained as a dark brown solid.  $^1\text{H}$  NMR (400 MHz,  $d_6$ -DMSO)  $\delta$  13.70 (br, 1H), 8.43 (s, 1H), 7.91 (d,  $J = 4.4$  Hz, 1H), 7.51-7.48 (m, 4H), 7.33-7.27 (m, 7H), 7.12 (d,  $J = 3.6$  Hz, 1H), 7.07 (t,  $J = 7.4$  Hz, 2H), 7.04 (d,  $J = 8.8$  Hz, 4H), 6.93 (d,  $J = 8.8$  Hz, 2H), 2.68 (t,  $J = 7.4$  Hz, 2H), 1.57 (m, 2H), 1.32-1.25 (m, 6H), 0.83 (t,  $J = 6.6$  Hz, 3H).  $^{13}\text{C}$  NMR (150 MHz,  $d_6$ -DMSO)  $\delta$  163.6, 147.0, 146.8, 146.2, 145.2, 143.3, 141.4, 140.2, 138.0, 134.0, 133.6, 133.2, 133.0, 130.2, 129.6, 128.1, 127.2, 127.1, 126.4, 125.4, 125.0, 124.4, 123.5, 123.4, 122.9, 116.6, 98.0, 31.1, 29.7, 29.0, 28.7, 22.1, 14.0. MS (MALDI):  $m/z$  (%) 752.2 ( $\text{M}^+$ ,100), 708.2, 681.1 HRMS: Calculated for  $\text{C}_{44}\text{H}_{36}\text{N}_2\text{O}_2\text{S}_4$ : 752.1660; Found: 752.1646.

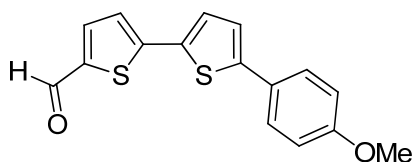

**5'-(4-Methoxyphenyl)-[2,2'-bithiophene]-5-carbaldehyde (9).** 3 equiv of **1e** was used. The product (65 mg, 72%, 0.3 mmol scale) as a yellow solid was purified with silica gel chromatography (Petroleum ether /Ethyl Acetate = 50:1). This compound is known.<sup>6</sup> <sup>1</sup>H NMR (300 MHz, *d6*-DMSO)  $\delta$  9.84 (s, 1H), 7.95 (d,  $J$  = 3.9 Hz, 1H), 7.60 (d,  $J$  = 8.4 Hz, 2H), 7.55 (d,  $J$  = 3.9 Hz, 1H), 7.48 (d,  $J$  = 3.9 Hz, 1H), 7.42 (d,  $J$  = 3.9 Hz, 1H), 6.97 (d,  $J$  = 8.4 Hz, 2H), 3.76 (s, 3H).

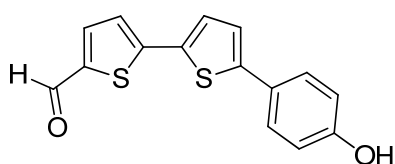

**5'-(4-hydroxyphenyl)-[2,2'-bithiophene]-5-carbaldehyde (10).** To a solution of compound **9** (77 mg, 0.26 mmol) in dichloromethane (10 mL) was added BBr<sub>3</sub> (4N in dichloromethane, 73  $\mu$ L, 1.1 equiv) at 0 °C. After the reaction mixture was stirred for 4 h, additional BBr<sub>3</sub> (80  $\mu$ L) was added. The reaction mixture was stirred overnight, and diluted with CH<sub>2</sub>Cl<sub>2</sub>. The resulting mixture was washed with water and concentrated. The residue was purified with silica gel chromatography (Petroleum ether/dichloromethane = 4:1) to give product **10** (62 mg, 84% yield) as a yellow solid. m.p. 229 °C. <sup>1</sup>H NMR (400 MHz, *d6*-DMSO)  $\delta$  9.85 (s, 1H), 9.81 (s, 1H), 7.97 (d,  $J$  = 3.6 Hz, 1H), 7.54 (d,  $J$  = 3.6 Hz, 1H), 7.52-7.48 (m, 3H), 7.36 (d,  $J$  = 3.6 Hz, 1H), 6.80 (d,  $J$  = 3.6 Hz, 2H). <sup>13</sup>C NMR (100 MHz, *d6*-DMSO)  $\delta$  183.8, 158.0, 145.9, 145.8, 140.8, 139.4, 132.6, 128.3, 127.0, 124.7, 123.9, 123.4, 116.0. MS (EI):  $m/z$  (%) 286 (M<sup>+</sup>), 84, 66 (100). HRMS: Calculated for C<sub>15</sub>H<sub>10</sub>O<sub>2</sub>S<sub>2</sub>: 286.0122; Found: 286.0119.

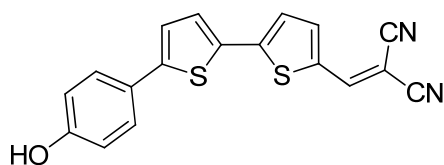

**2-((5'-(4-hydroxyphenyl)-[2,2'-bithiophen]-5-yl)methylene)malononitrile (11).** To a solution of **10** (34 mg, 0.12 mmol) in dichloromethane (10 mL) were added piperidine (1 drop) and malononitrile (20 mg, 2.4 equiv) at room temperature. After the reaction mixture was stirred for 2 h. The reaction was diluted with CH<sub>2</sub>Cl<sub>2</sub> and washed. The resulting mixture was concentrated and the

residue was purified with silica gel chromatography (Petroleum ether/dichloromethane = 2:1) to give product **11** (30 mg, 75% yield) as a dark-red solid. This compound is known.<sup>8</sup> m.p. 242-246 °C (lit.<sup>8</sup> 235-240 °C). <sup>1</sup>H NMR (400 MHz, *d6*-acetone) δ 8.78 (s, 1H), 8.38 (s, 1H), 7.92 (d, *J* = 3.4 Hz, 1H), 7.62 (d, *J* = 3.4 Hz, 1H), 7.61 (dm, *J* = 7.8 Hz, 2H), 7.55 (d, *J* = 3.8 Hz, 1H), 7.40 (d, *J* = 3.8 Hz, 1H), 6.93 (dm, *J* = 7.8 Hz, 2H).

### Kinetic isotope effect studies

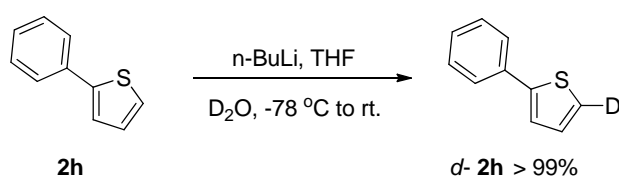

To an over-dried round bottom flask were added **2h** (10 mmol, 1.0 equiv), THF (20 mL) under N<sub>2</sub>. The solution was cooled to -78 °C and *n*-BuLi (4.4 mL, 2.5 M in hexane, 1.1equiv) was added slowly. After stirring for 1 h, the reaction mixture was allowed to warm to room temperature and re-cool to -20 °C. D<sub>2</sub>O (0.6 mL) was added slowly and the mixture was diluted with ethyl acetate, washed with water, dried over Na<sub>2</sub>SO<sub>4</sub>, filtered and concentrated. The product was purified with silica gel chromatography (100% petroleum ether) to give ***d*-2h** in >99% yield. <sup>1</sup>H NMR (400 MHz, CDCl<sub>3</sub>) δ 7.62 (d, *J* = 6.8 Hz, 2 H), 7.39 (t, *J* = 6.8 Hz, 2 H), 7.32-7.28 (m, 2 H), 7.08 (d, *J* = 3.6 Hz, 1 H).

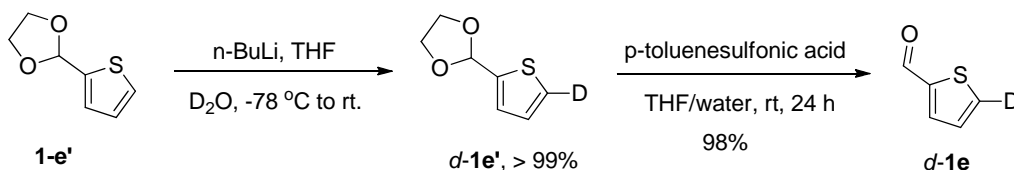

Compound **1-e'** was prepared according to the literature.<sup>7</sup> Preparation of ***d*-1e'** is similar with ***d*-2h**. Compound ***d*-1e** was prepared by deprotection of ***d*-1e'** with *p*-toluenesulfonic acid (catalytic amount) in THF/water (4/1) in almost quantity yield (98%). ***d*-1e**: <sup>1</sup>H NMR (400 MHz, CDCl<sub>3</sub>) δ 9.97 (s, 1 H), 7.81 (d, *J* = 3.6 Hz, 1 H), 7.23 (d, *J* = 3.6 Hz, 1 H).

### Kinetic isotope experiments.

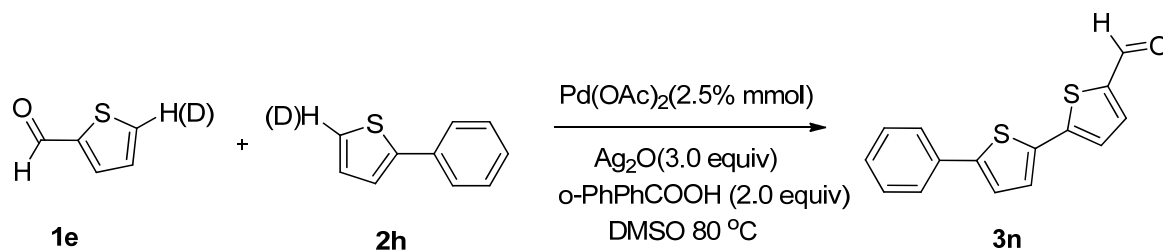

The initial rate measurements were carried out on a 0.3 mmol scale. The reactions were carried out according to standard procedure, stopped after the corresponding reaction time (10 min-120 min) and immediately cooled to room temperature. Then 100  $\mu\text{L}$  internal standard (1,3,5-trimethoxybenzene in DMSO (0.1 mmol/mL)) was added. The yield was determined by GC. The obtained yields were plotted as concentration [**3n**] vs. time *t* (Figure S1). From the diagram, the following initial rates were calculated:

$$K_{\text{H}} = 2.238 \times 10^{-4} \text{ mmol}\cdot\text{mL}^{-1}\cdot\text{min}^{-1}$$

$$K_{\text{D}(d1e-2h)} = 8.570 \times 10^{-5} \text{ mmol}\cdot\text{mL}^{-1}\cdot\text{min}^{-1}$$

$$K_{\text{D}(1e-d2h)} = 5.454 \times 10^{-5} \text{ mmol}\cdot\text{mL}^{-1}\cdot\text{min}^{-1}$$

Therefore, the  $k_{\text{H}}/k_{\text{D}(d1e-2h)} = 2.6$ ;  $k_{\text{H}}/k_{\text{D}(1e-d2h)} = 4.1$

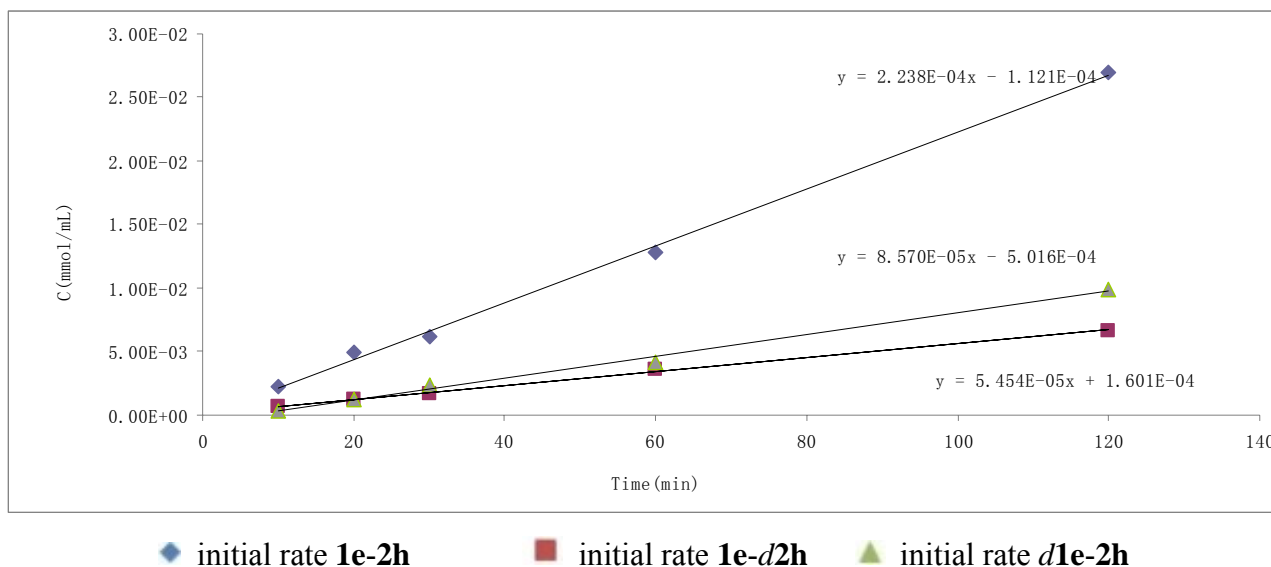

Figure S1. Initial rates of the standard reaction **1e-2h** (blue), **1e-d2h** (red), and **d1e-2h** (green).

### References:

- (1) Takahashi, M.; Masui, K.; Sekiguchi, H.; Kobayashi, N.; Mori, A.; Funahashi, M.; Tamaoki, N. *J. Am. Chem. Soc.* **2006**, *128*, 10930-10933.
- (2) (a) Sahu, D.; Padhy, H.; Patra, D.; Kekuda, D.; Chu, C-W.; Chiang, I-C.; Lin, H-C. *Polymer*. **2010**, *51*, 6182-6192; (b) Chu, C-W.; Sahu, D.; Padhy, H.; Patra, D.; Lin, J-T.; Bhattacharya, D.; Lu, K-L.; Wei, K-H.; Lin, H-C. *Dyes Pigm.* **2012**, *93*, 1488-1497.
- (3) Belletete, M.; Morin, J-F.; Beaupre, S.; Ranger, M.; Leclerc, M.; Durocher, G. *Macromolecules* **2001**, *34*, 2288-2297.
- (4) Maurizio, D.; Antonella, D.; Franco, D.; Daniele, M.; Giovanni, P. *Journal of Photochemistry and Photobiology, A: Chemistry* **1989**, *47*, 191-201.
- (5) Wilhelm, S.; Reinhard, L.; Karl Heinz, H. *Justus Liebigs Annalen der Chemie* **1941**, *546*, 180-199.
- (6) (a) Herbivo, C.; Comel, A.; Kirsch, G.; Raposo, M. *Tetrahedron*. **2009**, *65*, 2079-2086; (b) Herbivo, C.; Comel, A.; Kirsch, G.; Mauricio C, A.; Fonseca, M-C.; Belsley, M.; Raposo, M. *Dyes Pigm.* **2010**, *86*, 217-226.
- (7) Steinberger, S.; Mishra, A.; Reinold, E.; Mena-Osteritz, E.; Muller, H.; Uhrich, C.; Pfeiffer, M.; and Bauerle, P. *J. Mater. Chem.* **2012**, *22*, 2701.
- (8) Nesterov, E. E.; Skoch, J.; Hyman, B. T.; Klunk, W. E.; Backai, B. J.; Swager, T. M. *Angew. Chem. Int. Ed.* **2005**, *44*, 5452.

### 5'-Bromo-4'-hexyl-*N,N*-dimethyl-[2,2'-bithiophene]-5-carboxamide (3a).

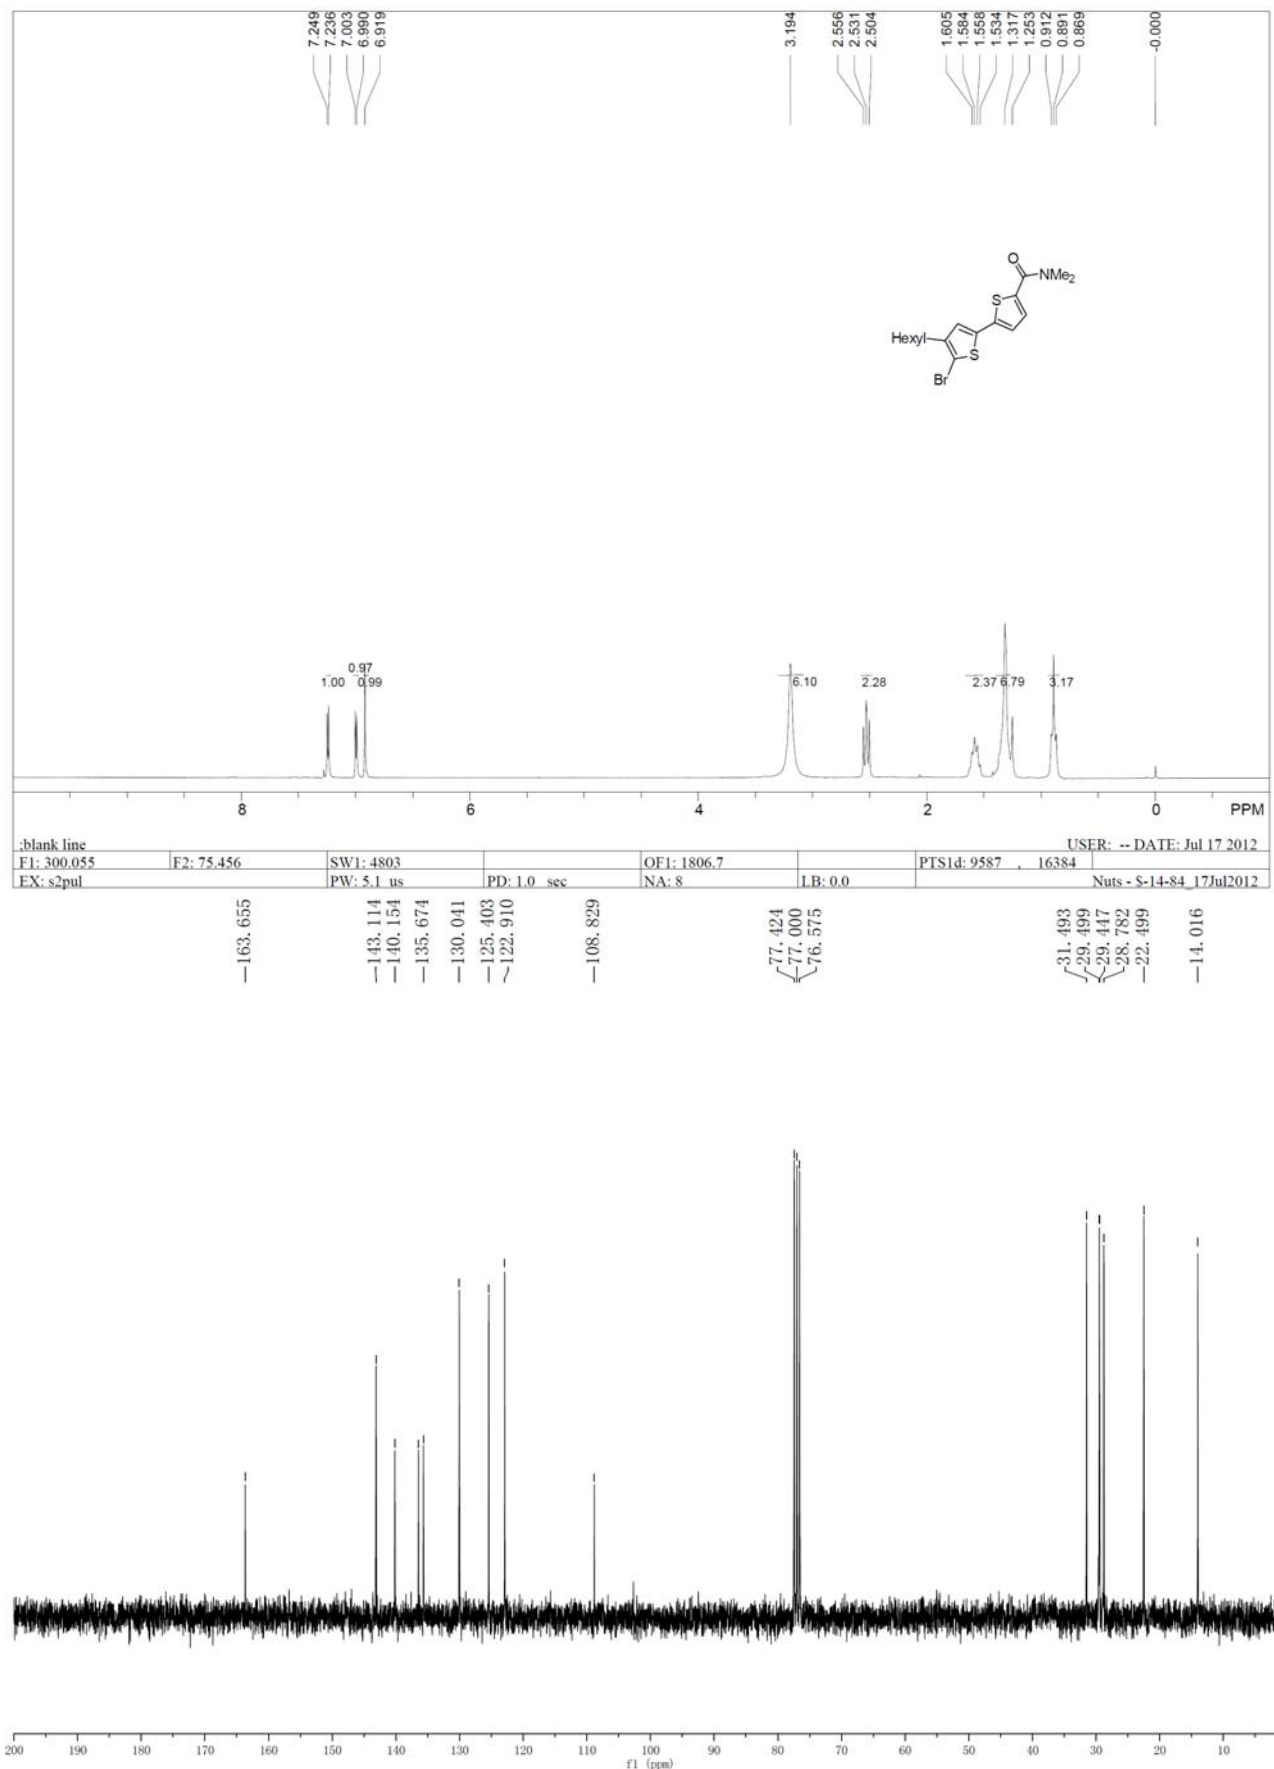

### Methyl 5'-bromo-4'-hexyl-[2,2'-bithiophene]-5-carboxylate (3b).

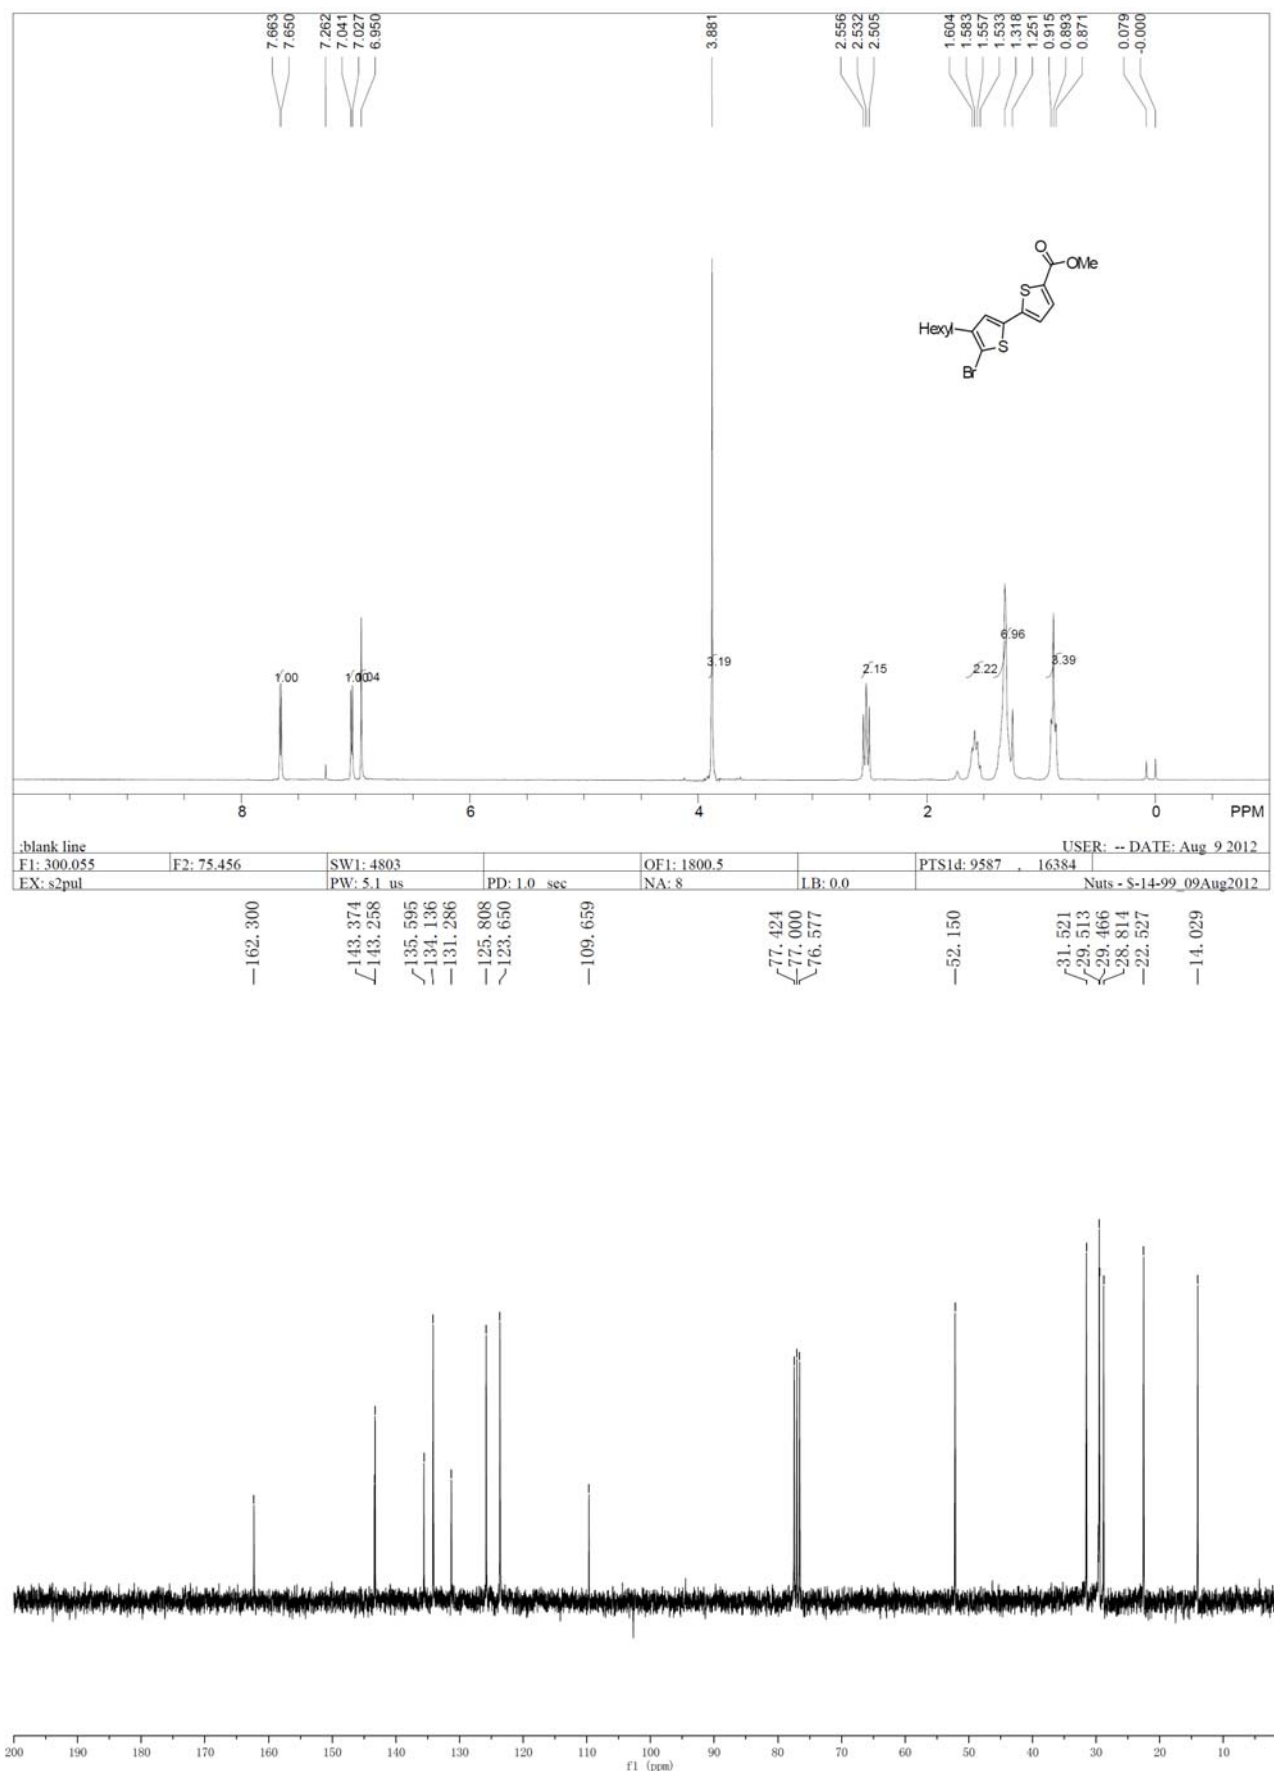

**Methyl 5'-bromo-4'-hexyl-4-methyl-[2,2'-bithiophene]-5-carboxylate (3c).**

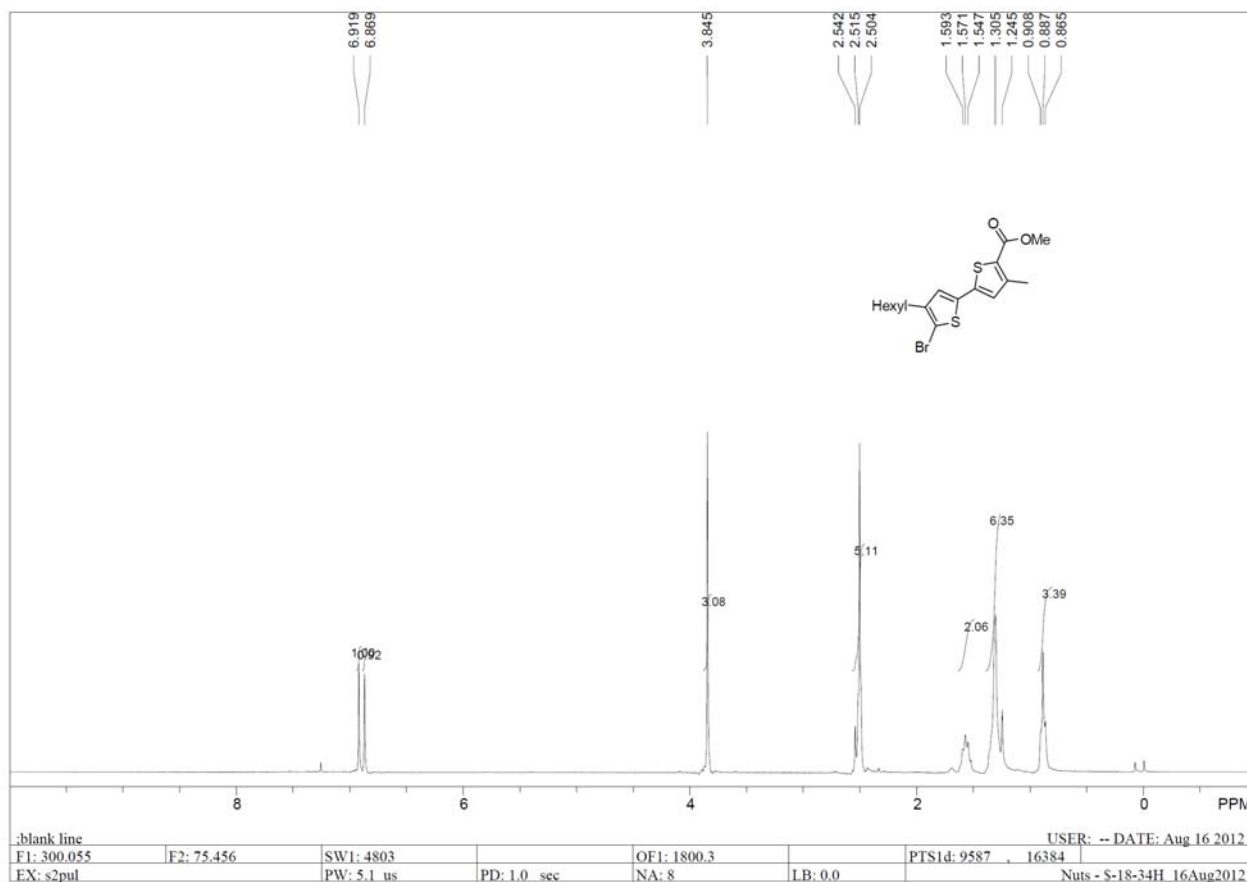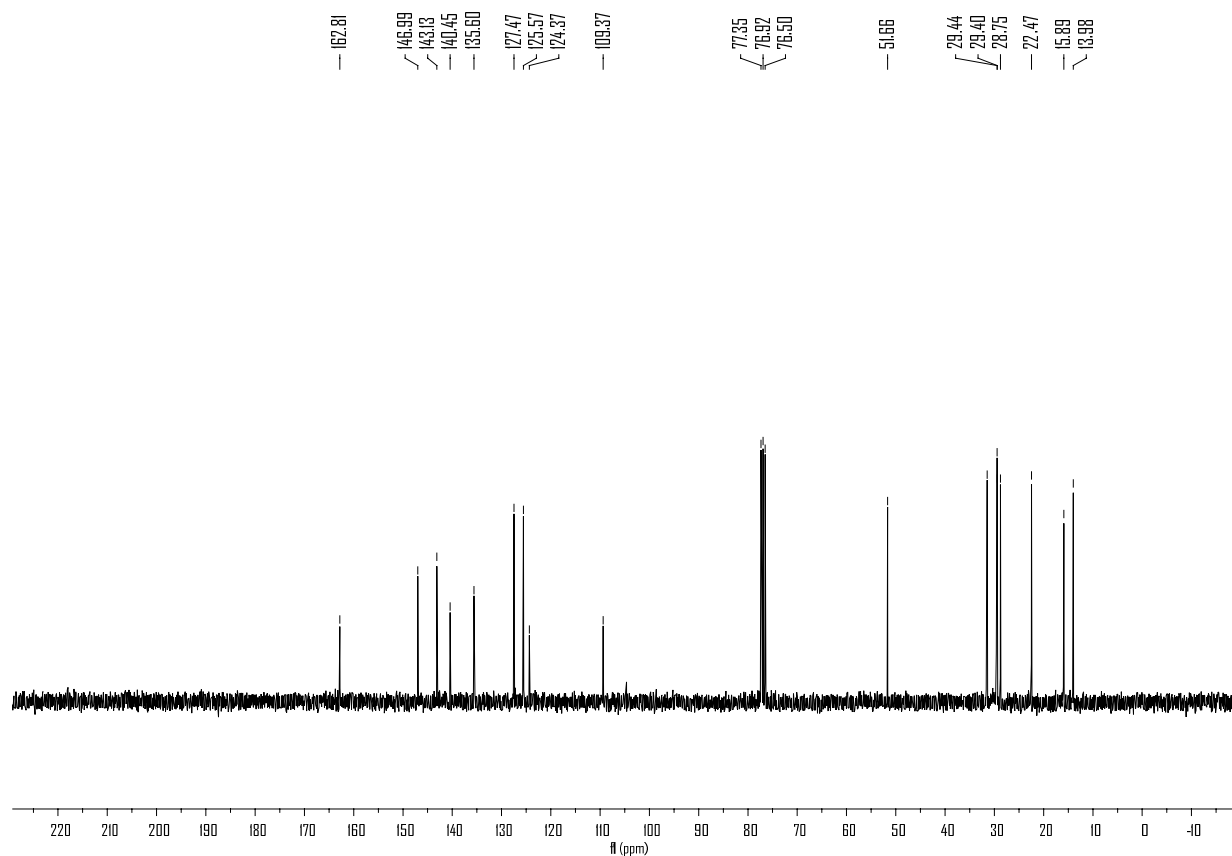



### 1-(5'-Bromo-4'-hexyl-[2,2'-bithiophen]-5-yl)ethanone (3d).

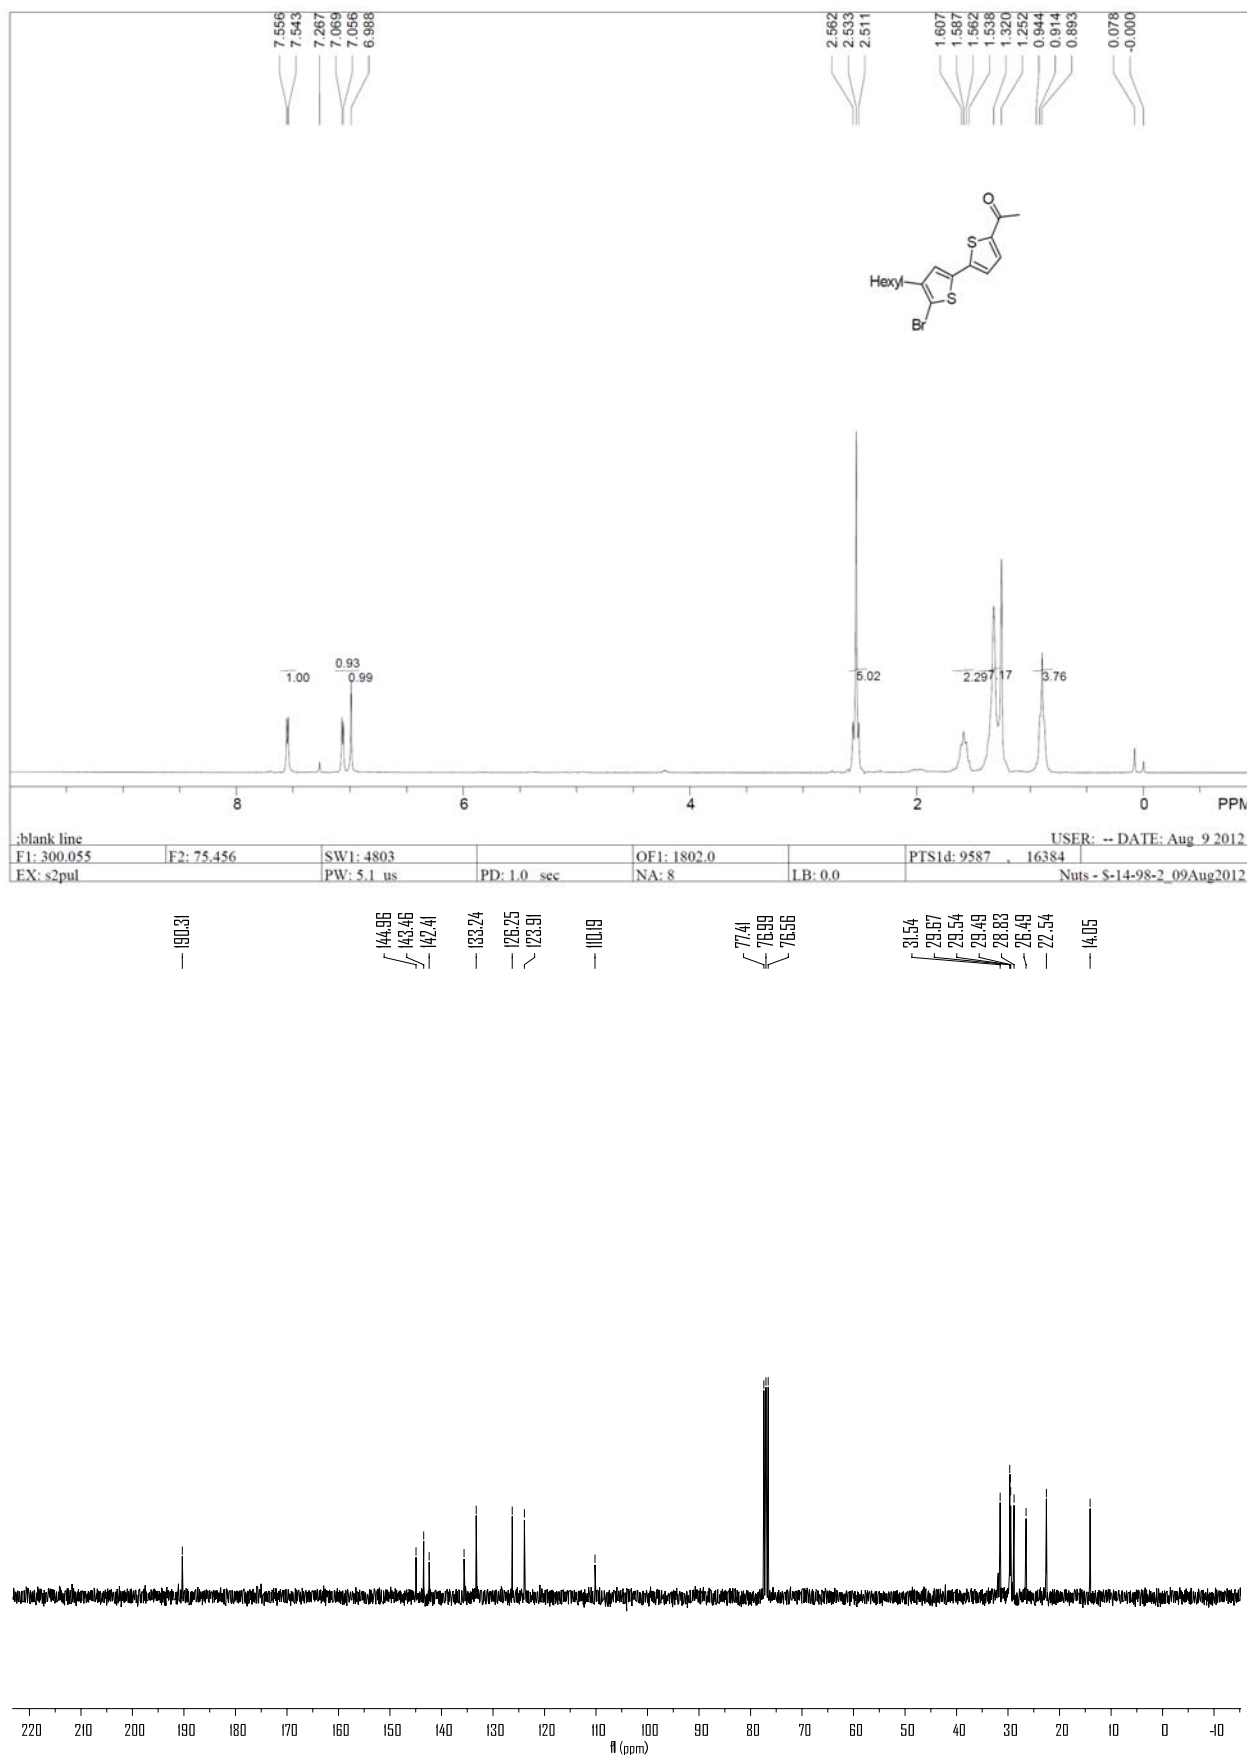

### 5'-Bromo-4'-hexyl-[2,2'-bithiophene]-5-carbaldehyde (3e).

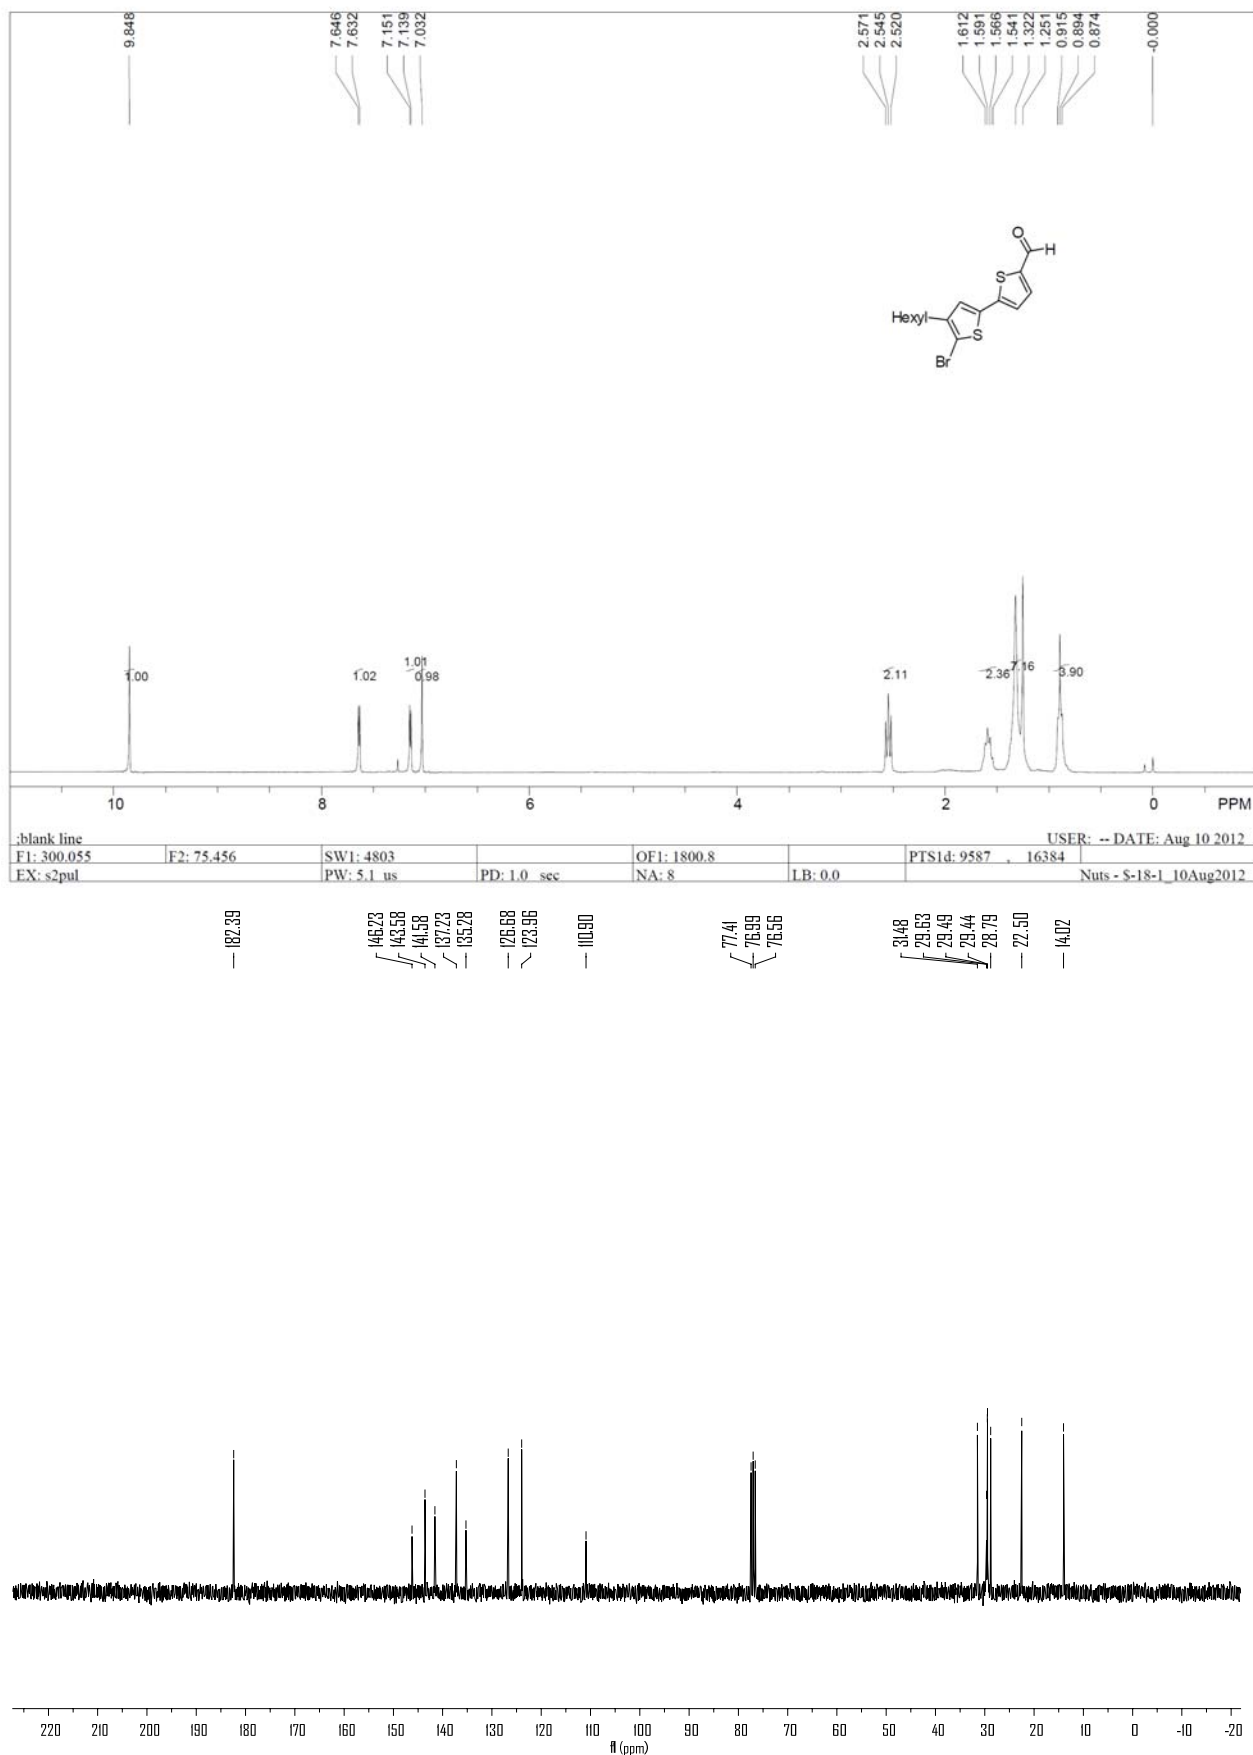

### 5'-Bromo-4'-hexyl-[2,2'-bithiophene]-5-carbonitrile (3f).

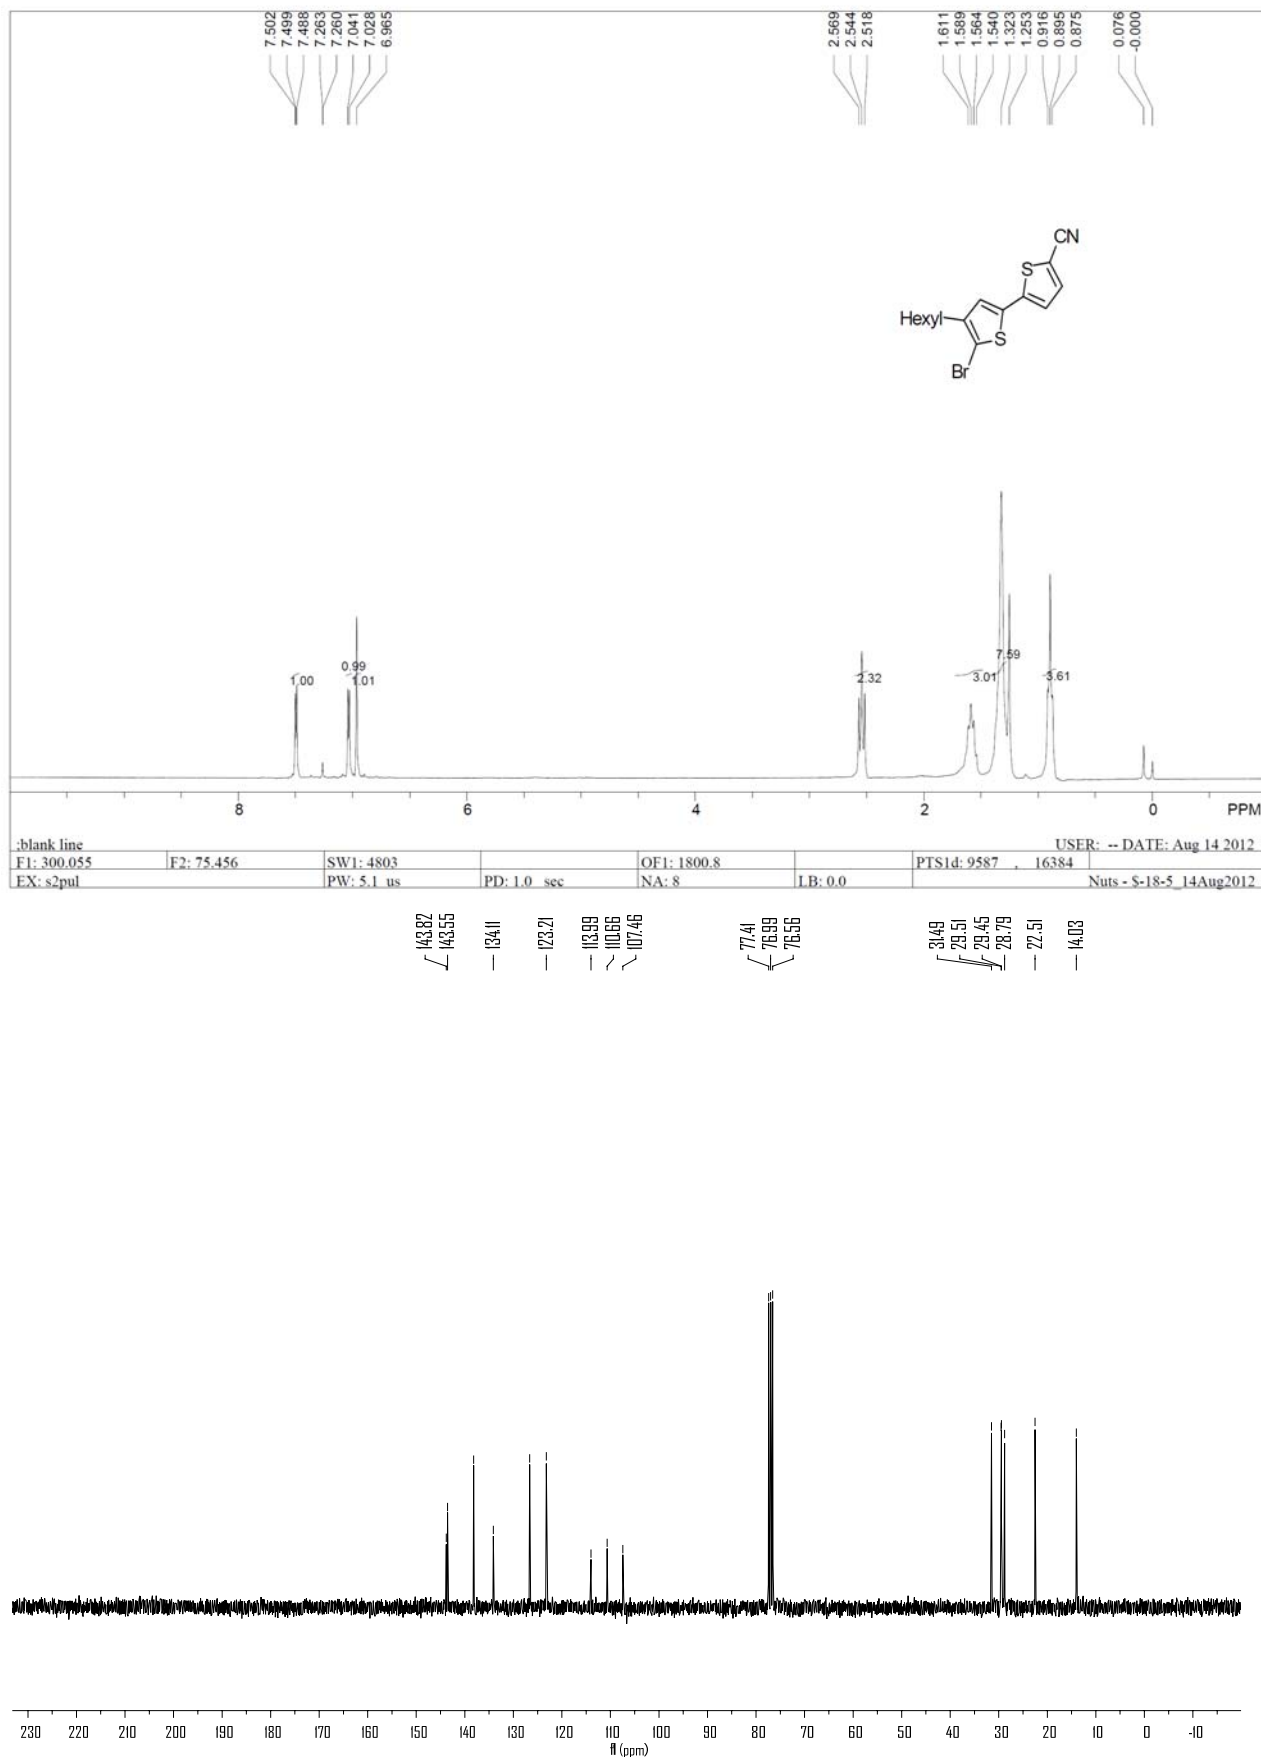

### Methyl 5'-bromo-4'-methyl-[2,2'-bithiophene]-5-carboxylate (3g).

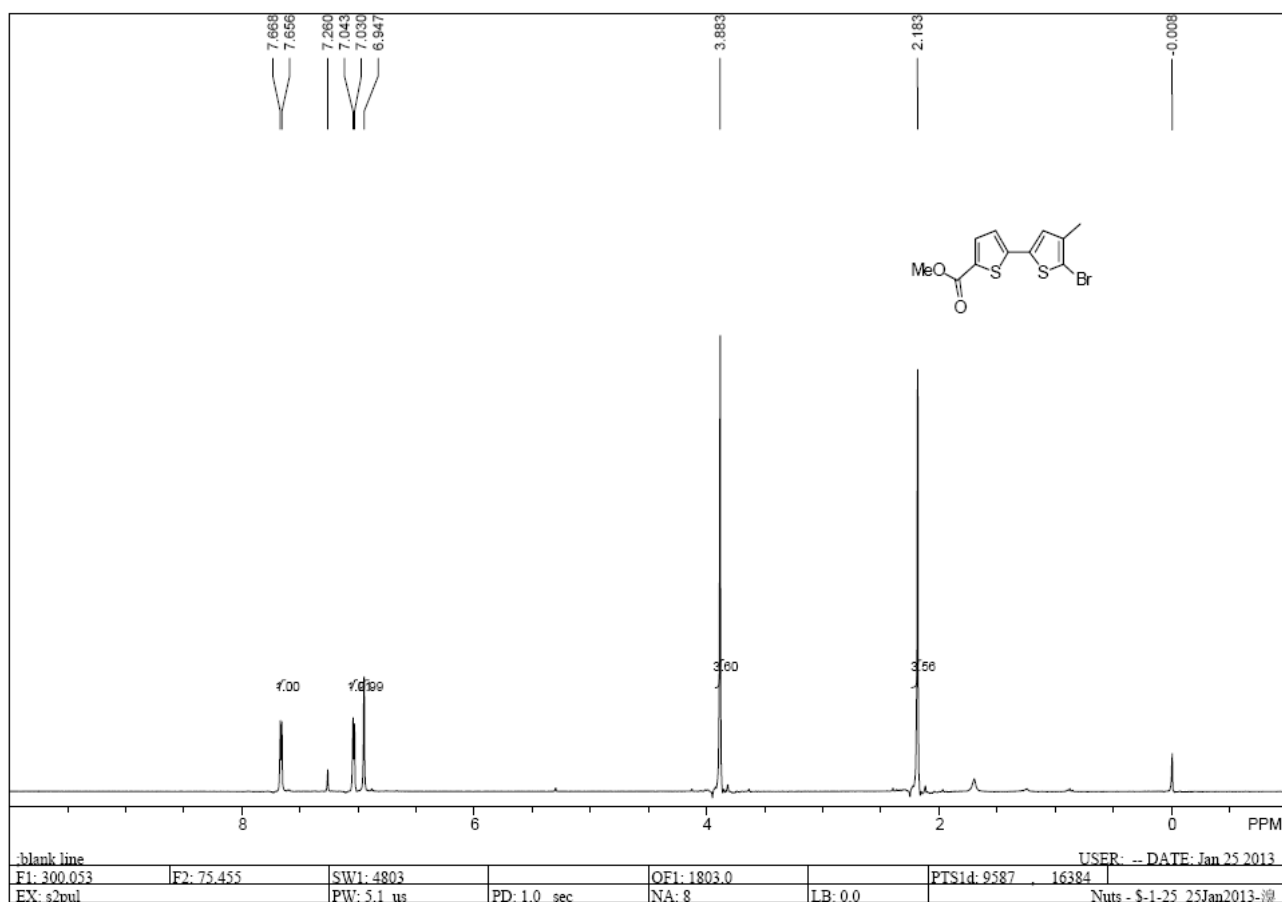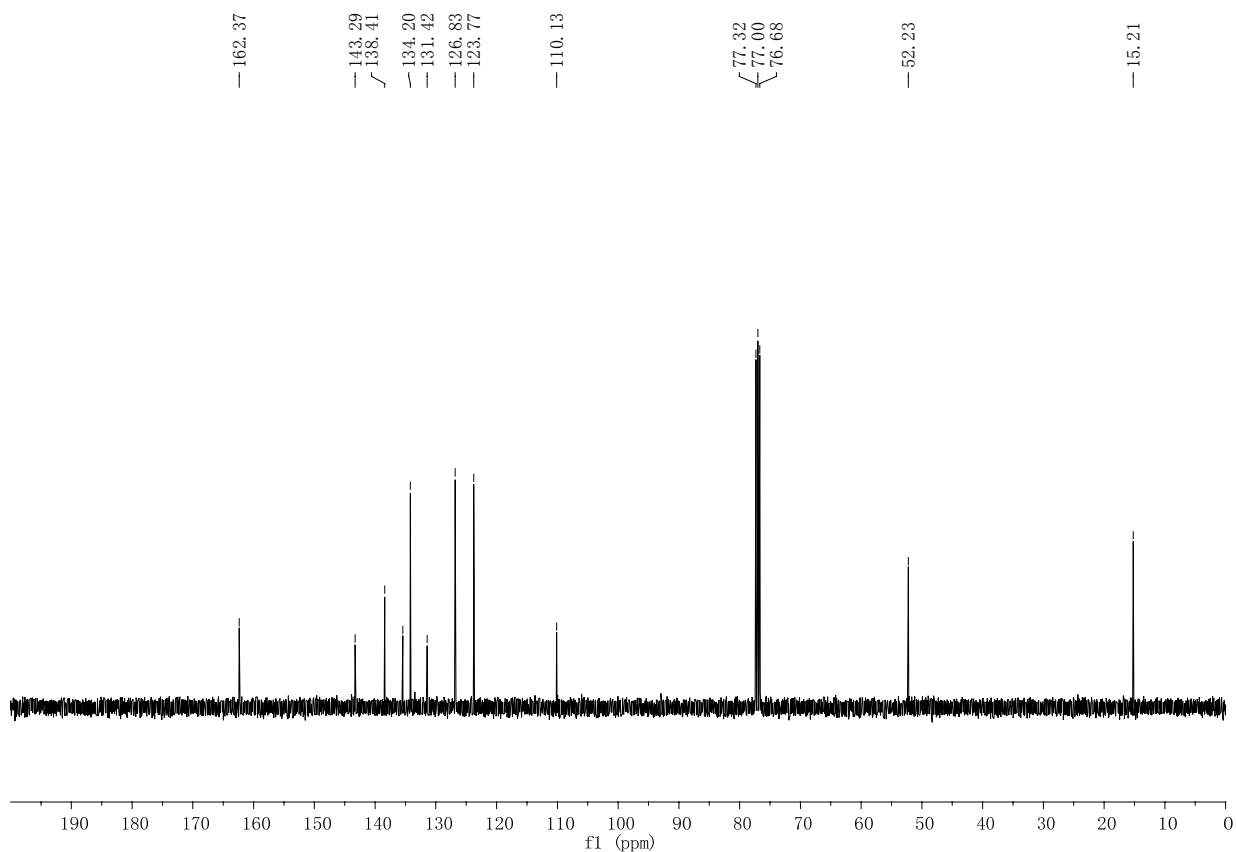

**Methyl 5'-chloro-4'-methyl-[2,2'-bithiophene]-5-carboxylate (3i).**

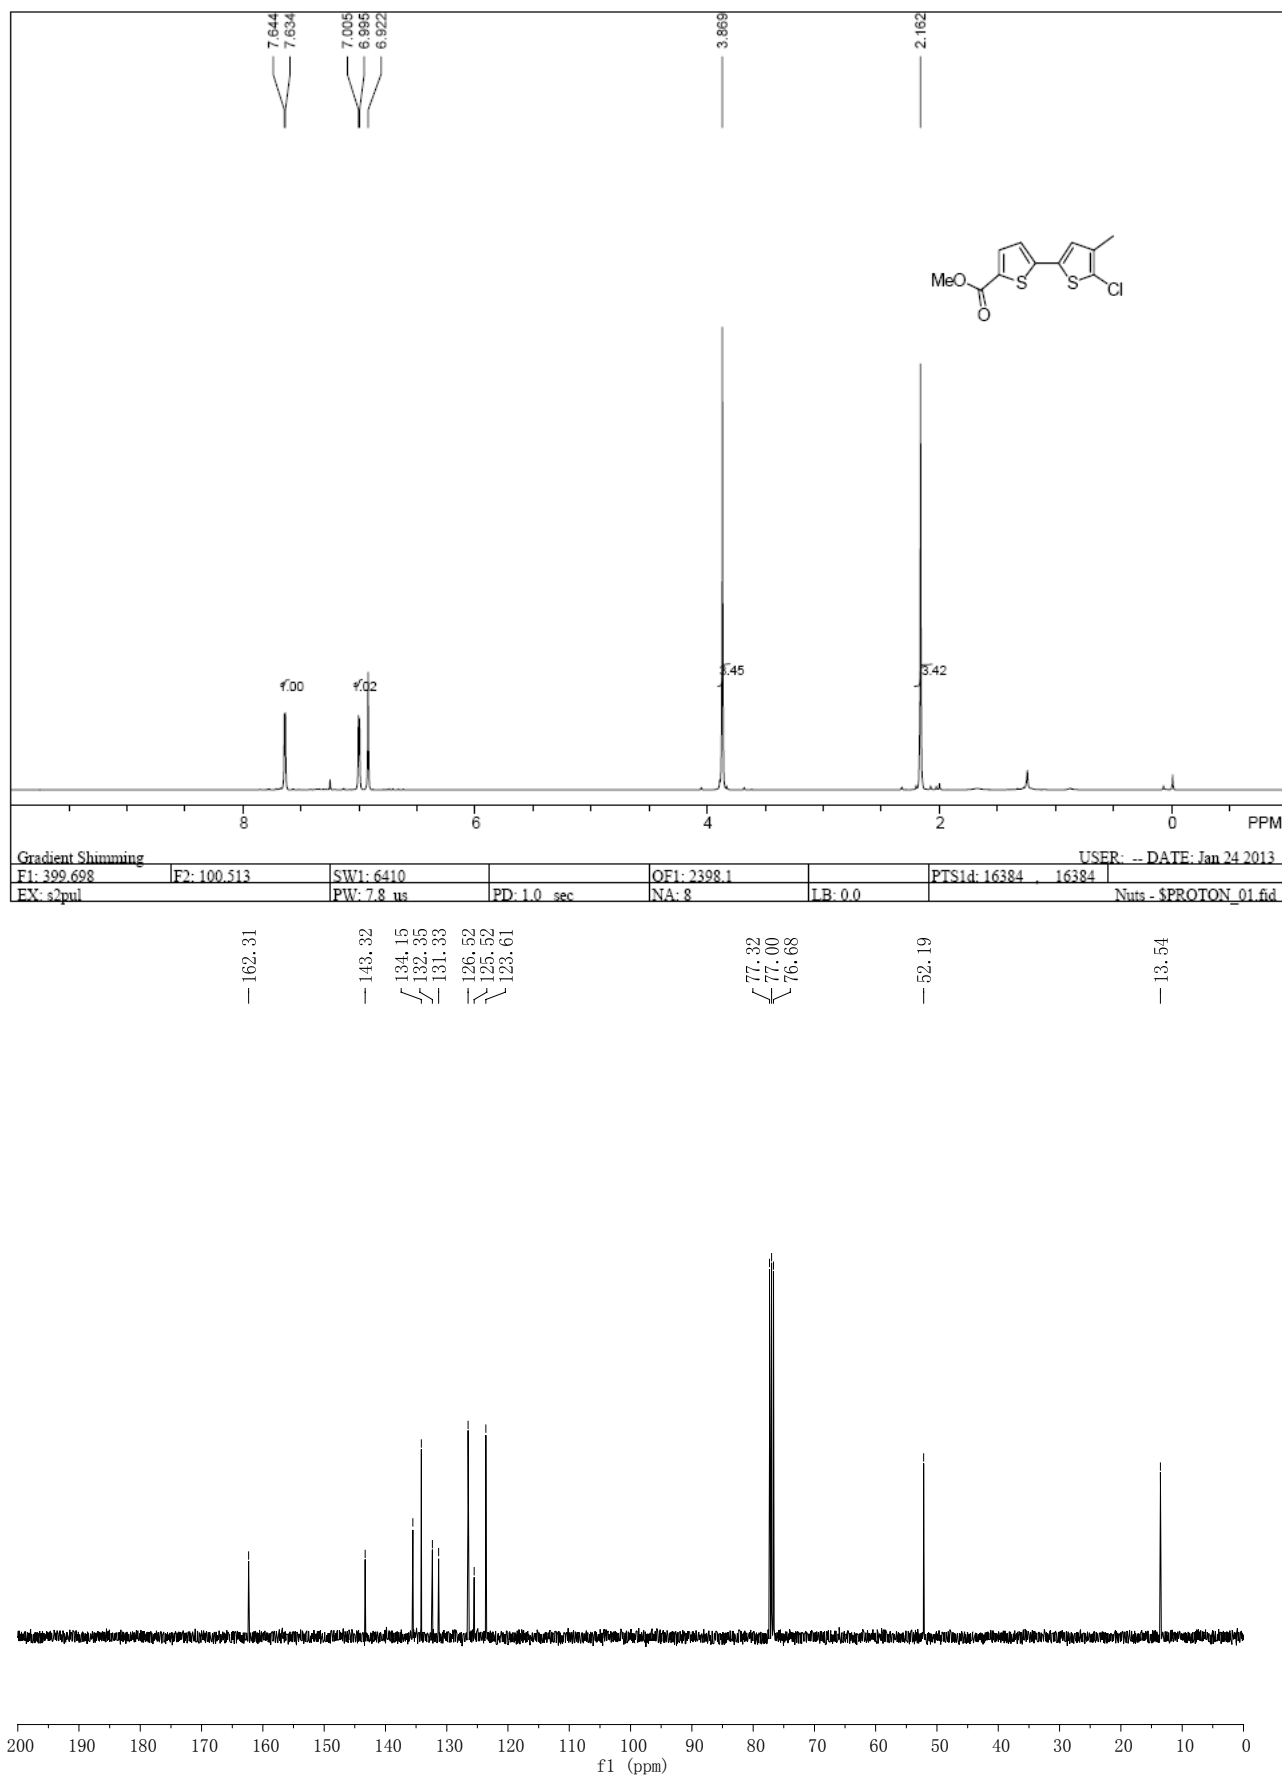

### Methyl 5'-chloro-[2,2'-bithiophene]-5-carboxylate (3j).

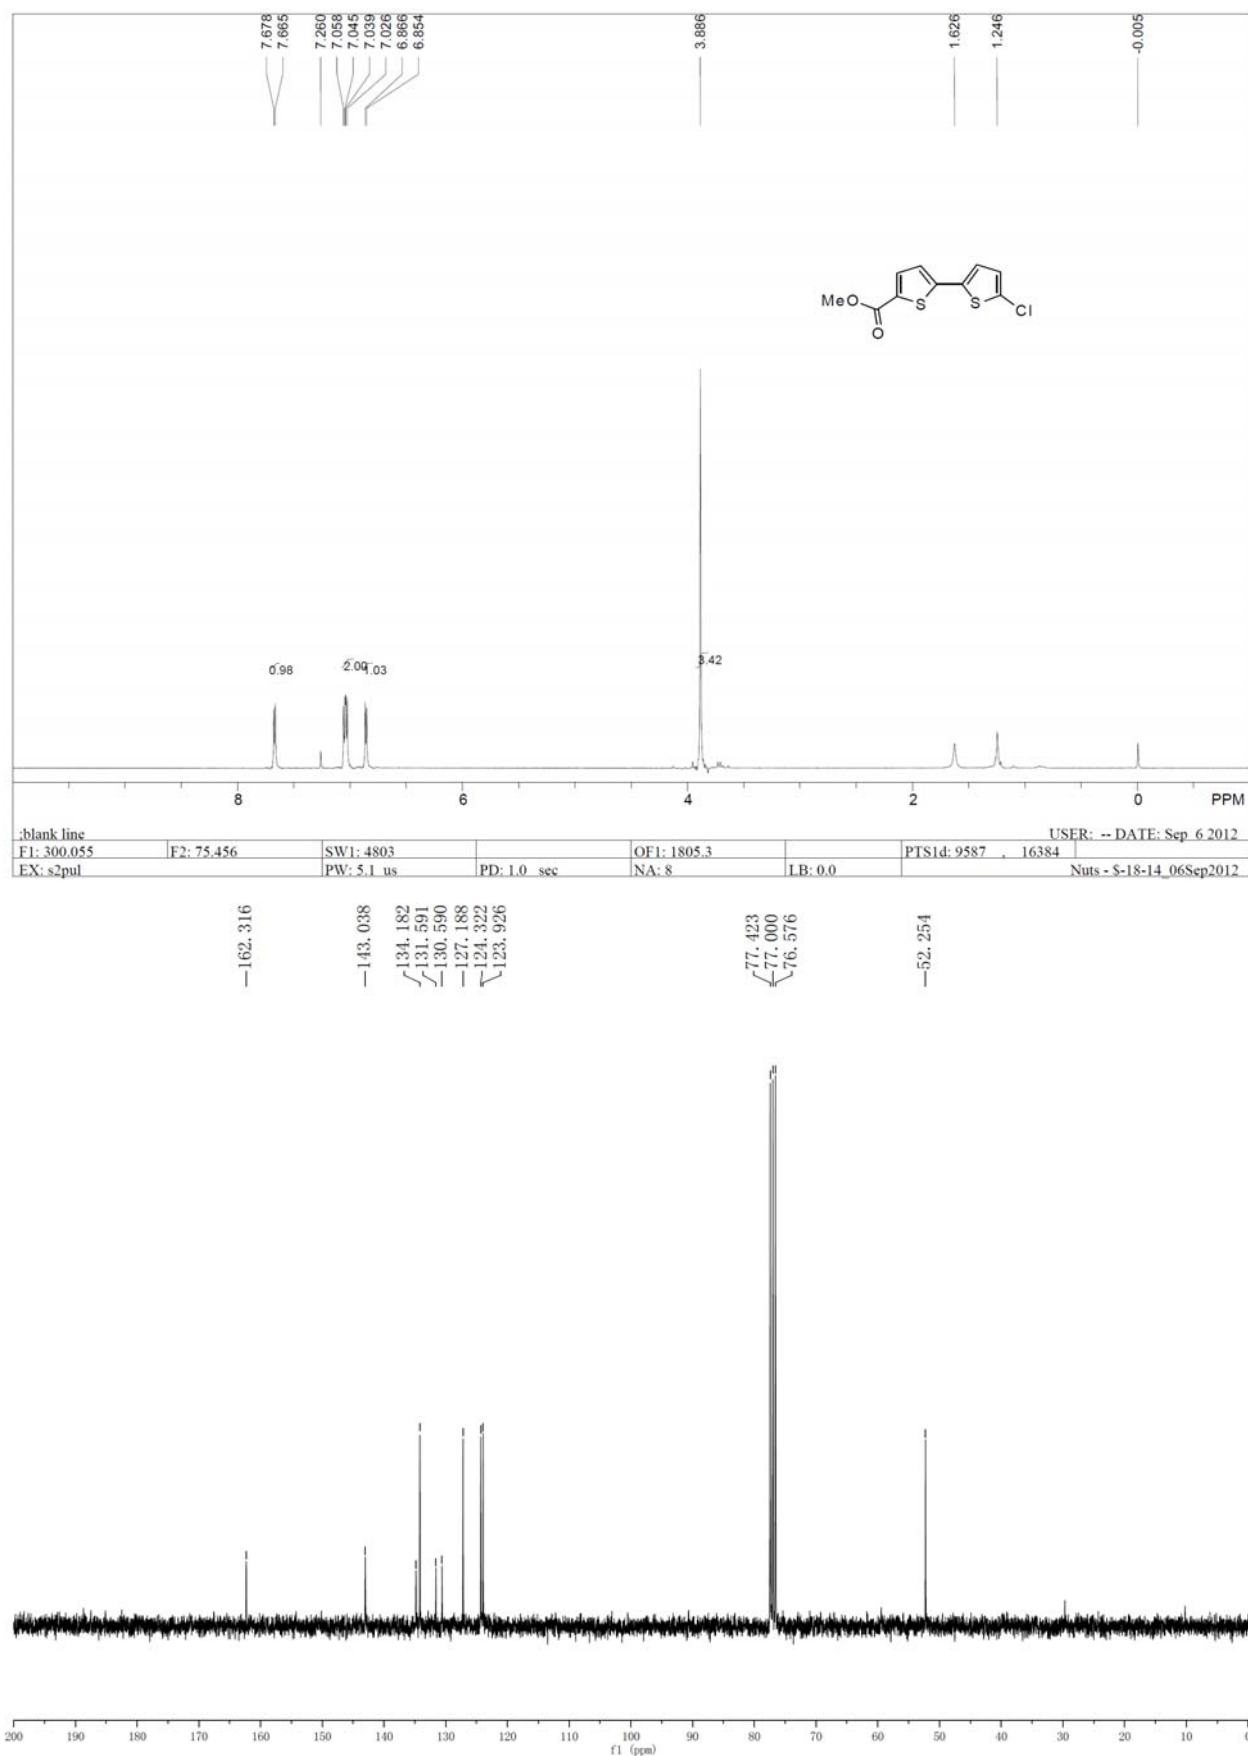

### Methyl 5'-methyl-[2,2'-bithiophene]-5-carboxylate (3k).

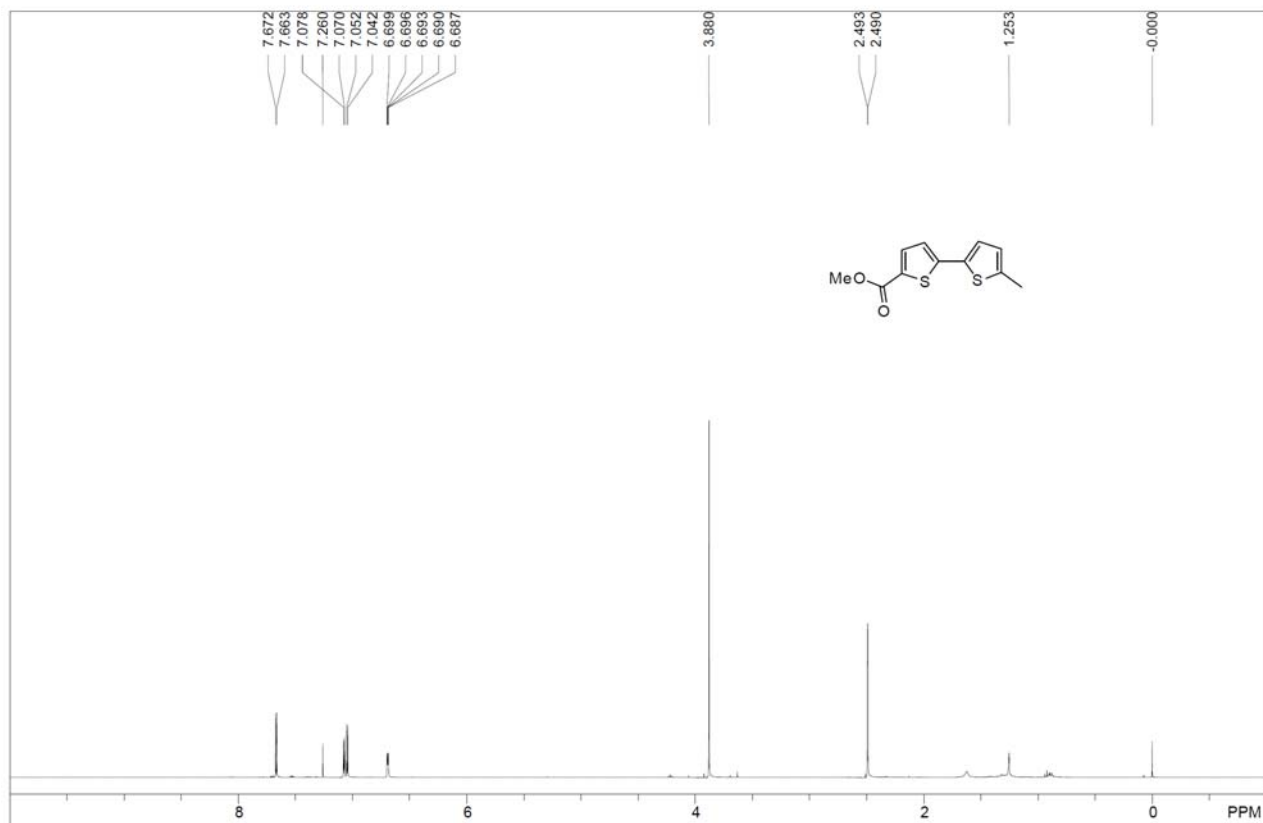

.blank line  
F1: 399.723 F2: 100.519 SW1: 7184 OF1: 2799.0 PTS1d: 21552 , 32768 USER: -- DATE: Sep 8 2012  
EX: s2pul PW: 7.0 us PD: 5.0 sec NA: 8 LB: 0.0 Nuts - S18-20-h.fid

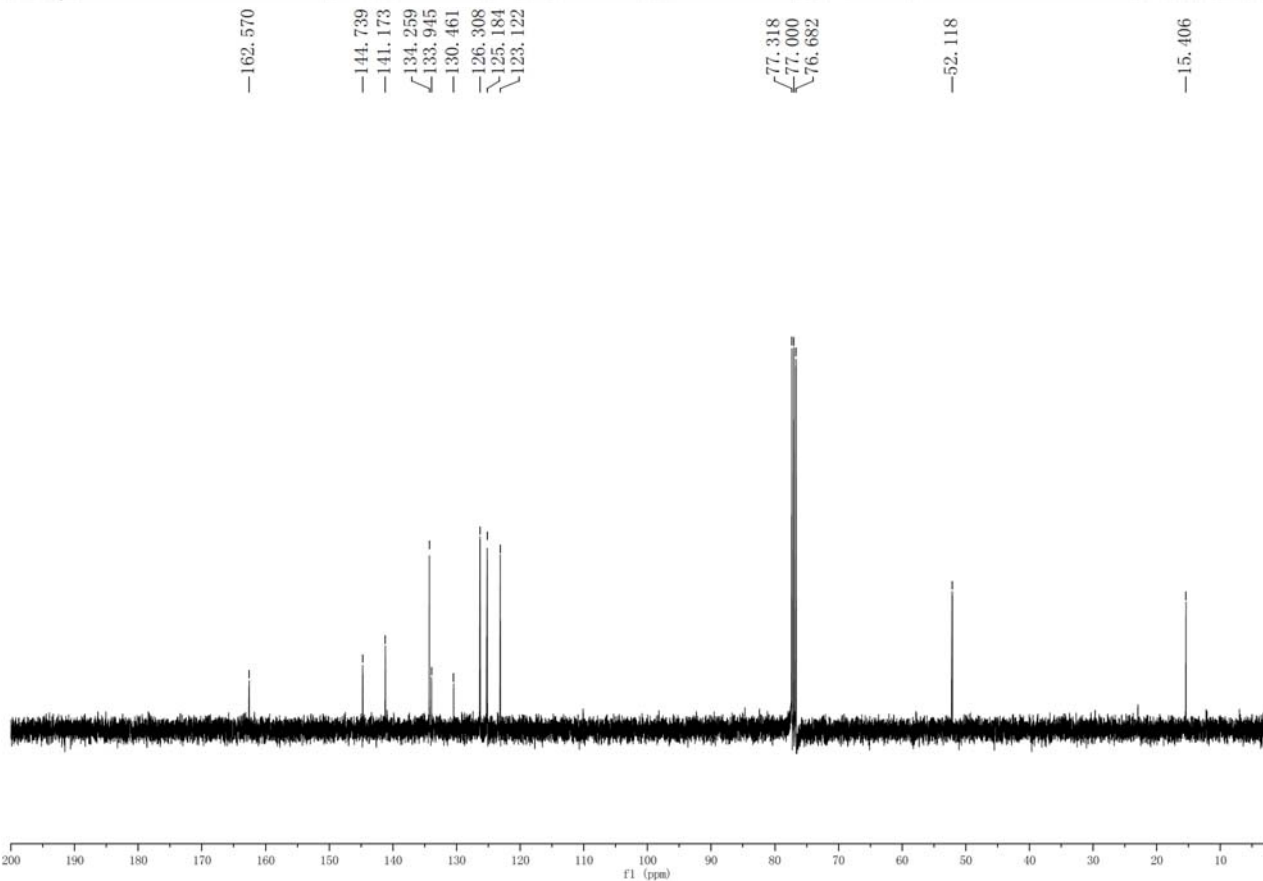

### Methyl 5-(benzo[b]thiophen-2-yl)thiophene-2-carboxylate (3l).

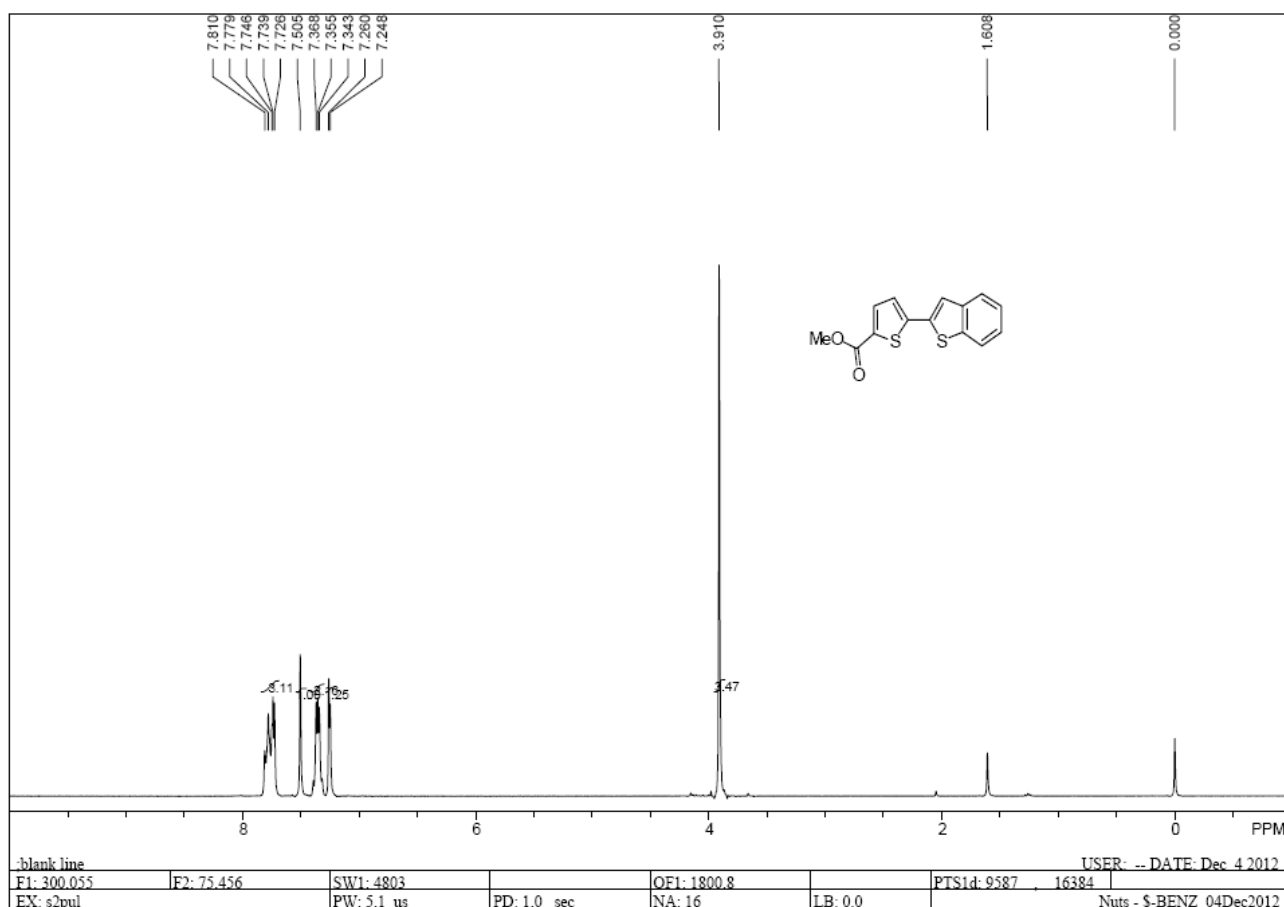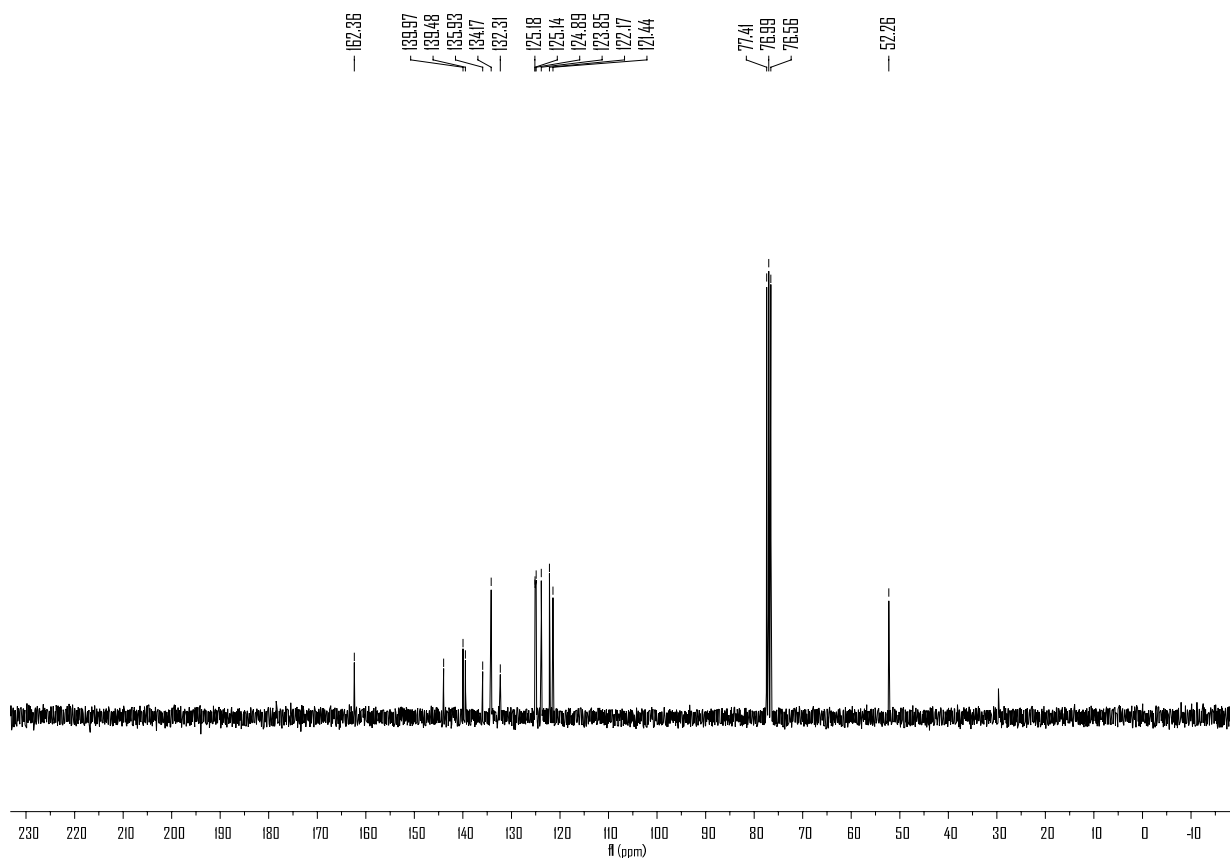



***N,N*-Dimethyl-5'-phenyl-[2,2'-bithiophene]-5-carboxamide (3m).**

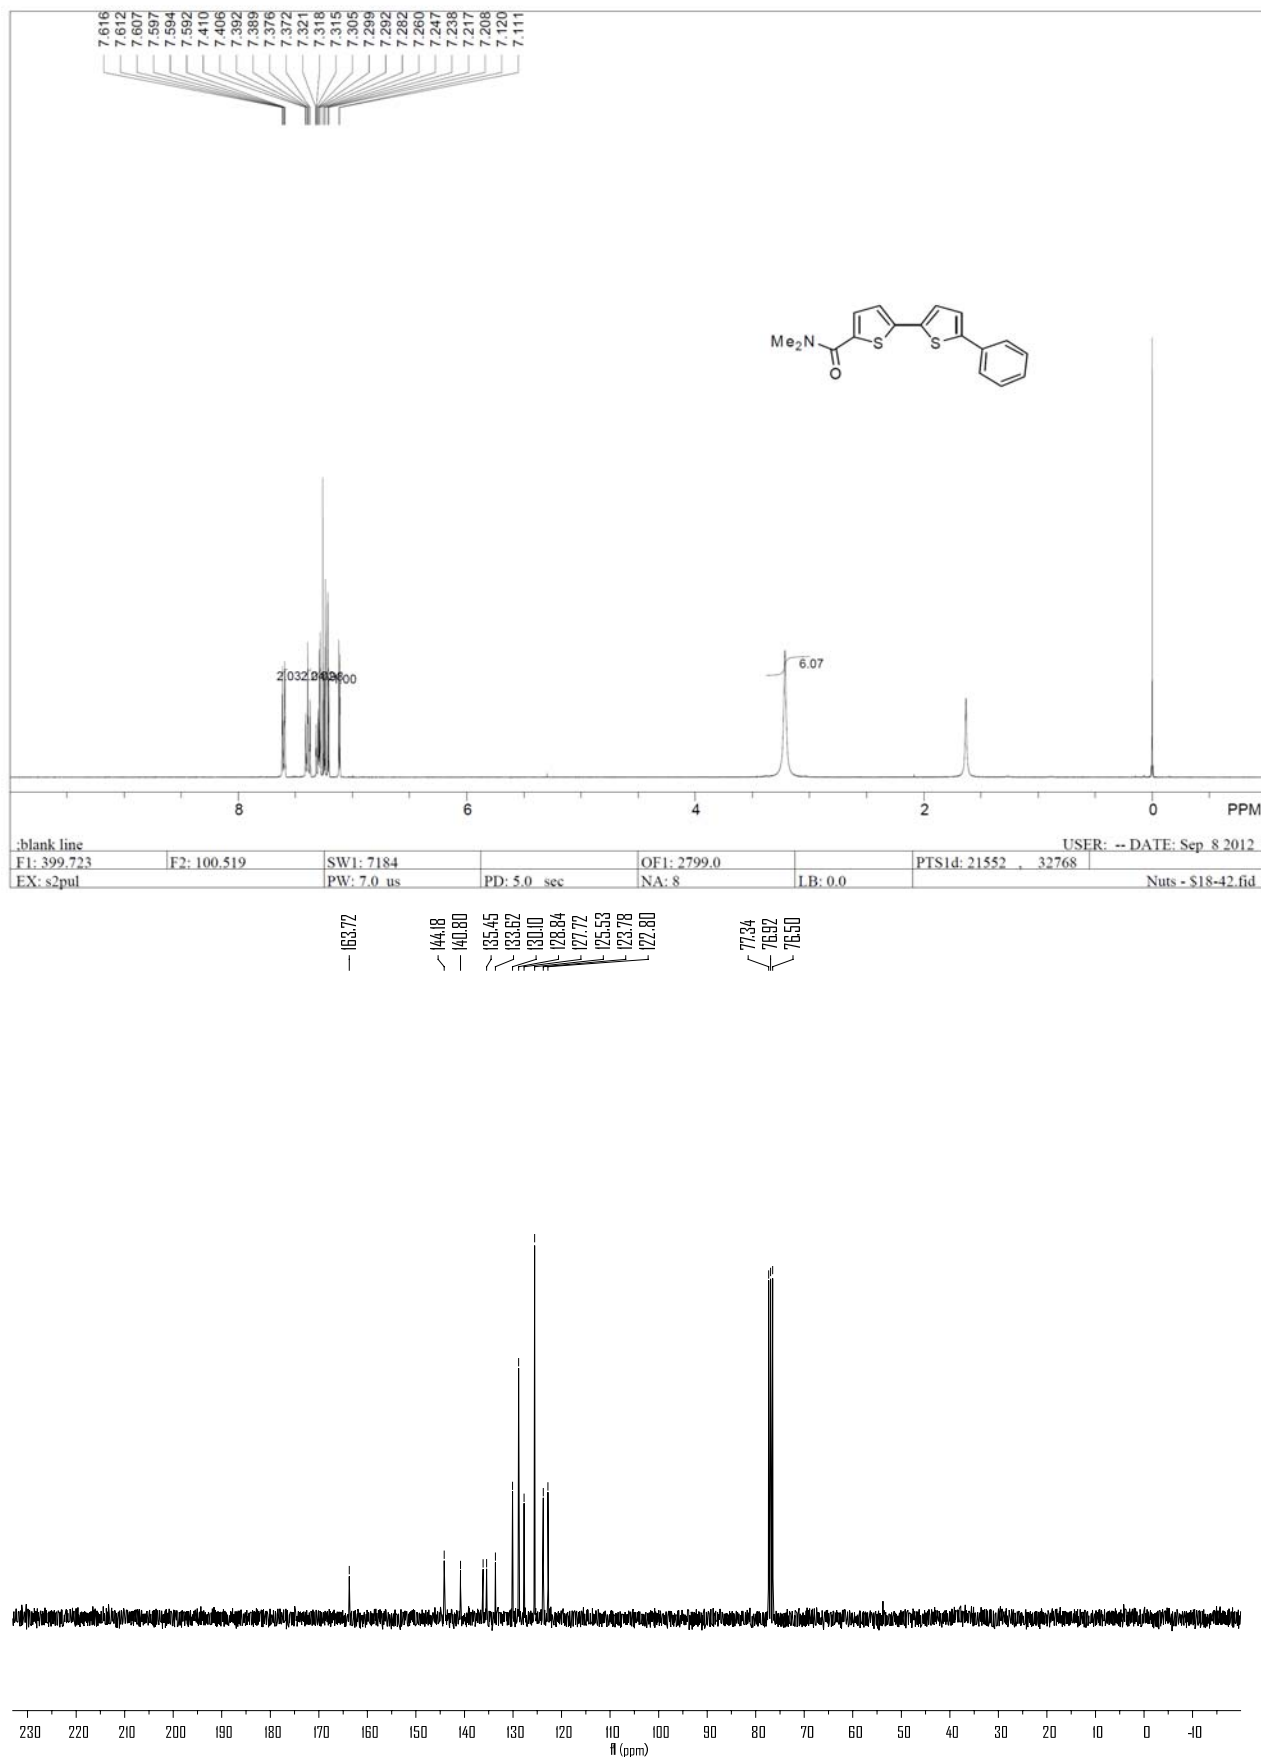

### 5'-Phenyl-[2,2'-bithiophene]-5-carbaldehyde (3n).

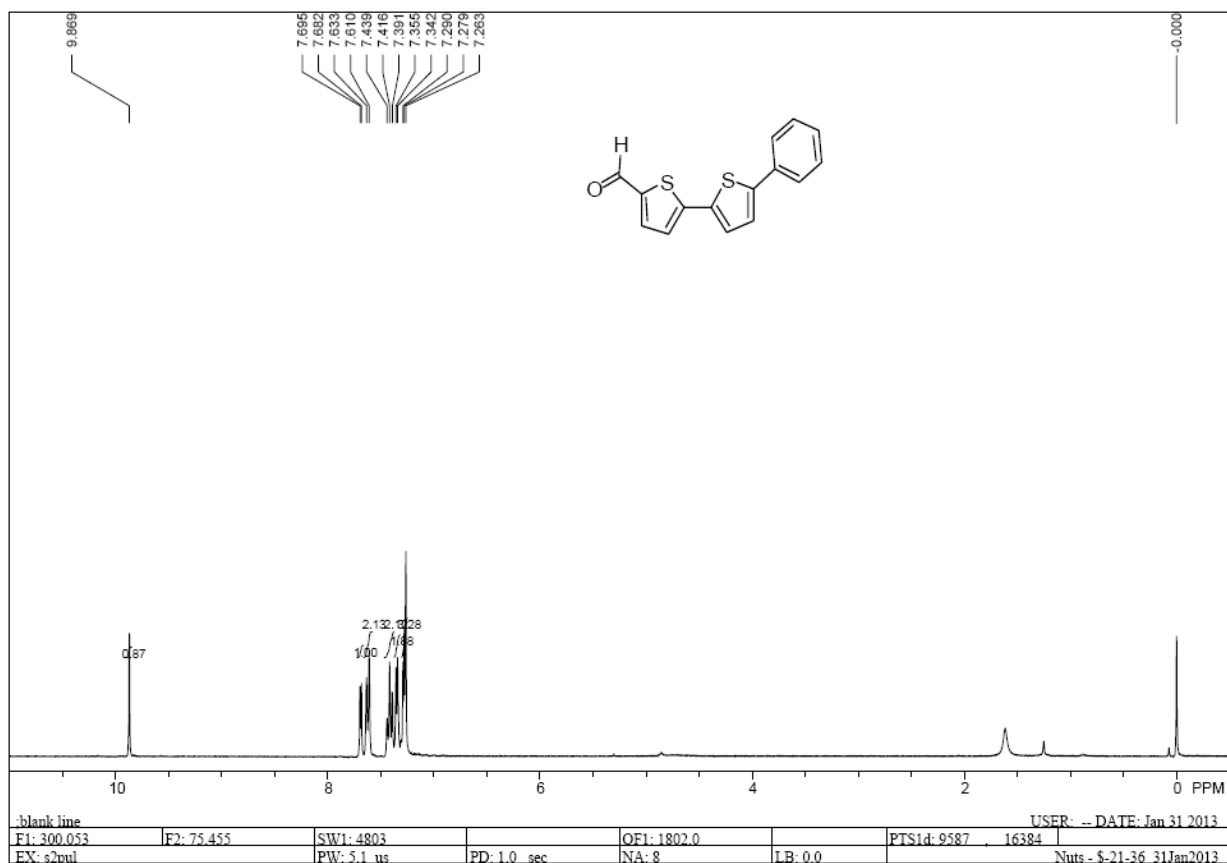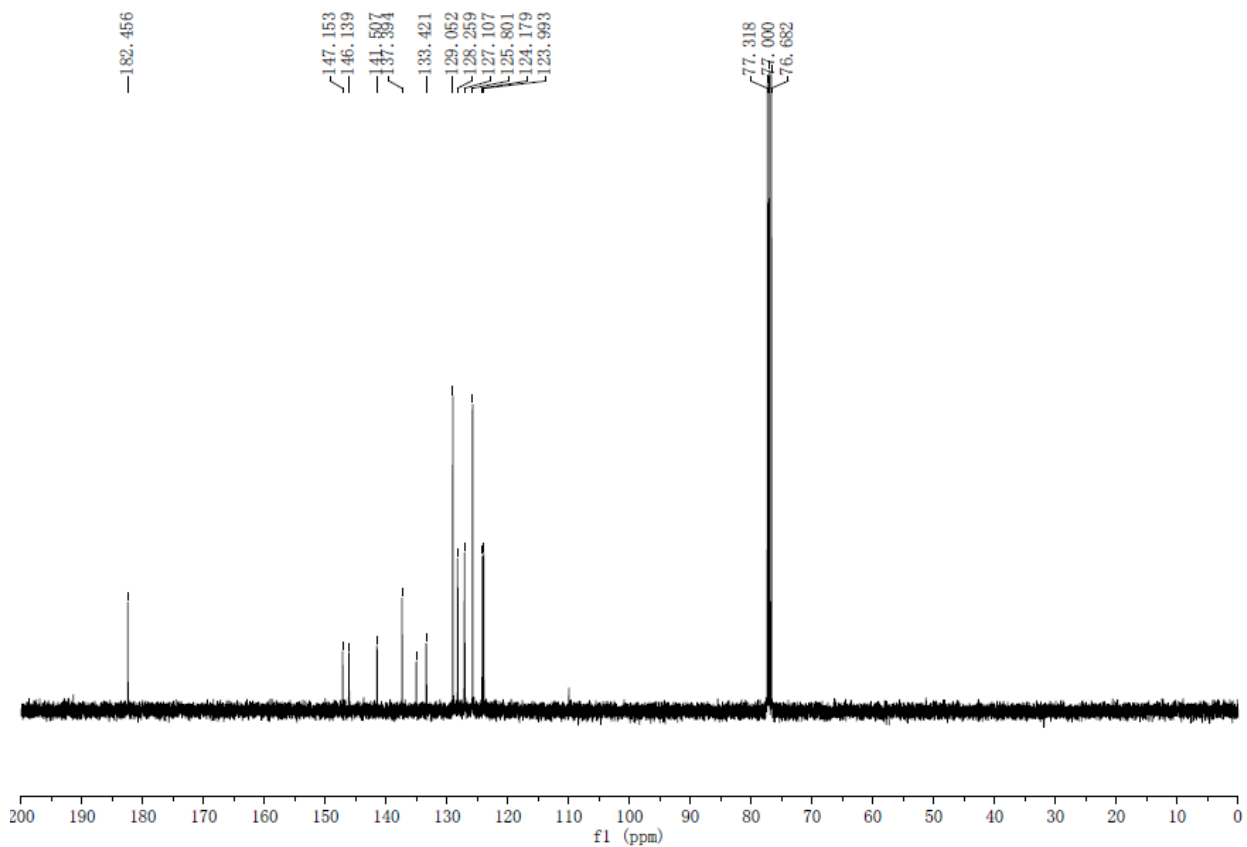

### *N,N*-Dimethyl-5'-(phenylethynyl)-[2,2'-bithiophene]-5-carboxamide (3o).

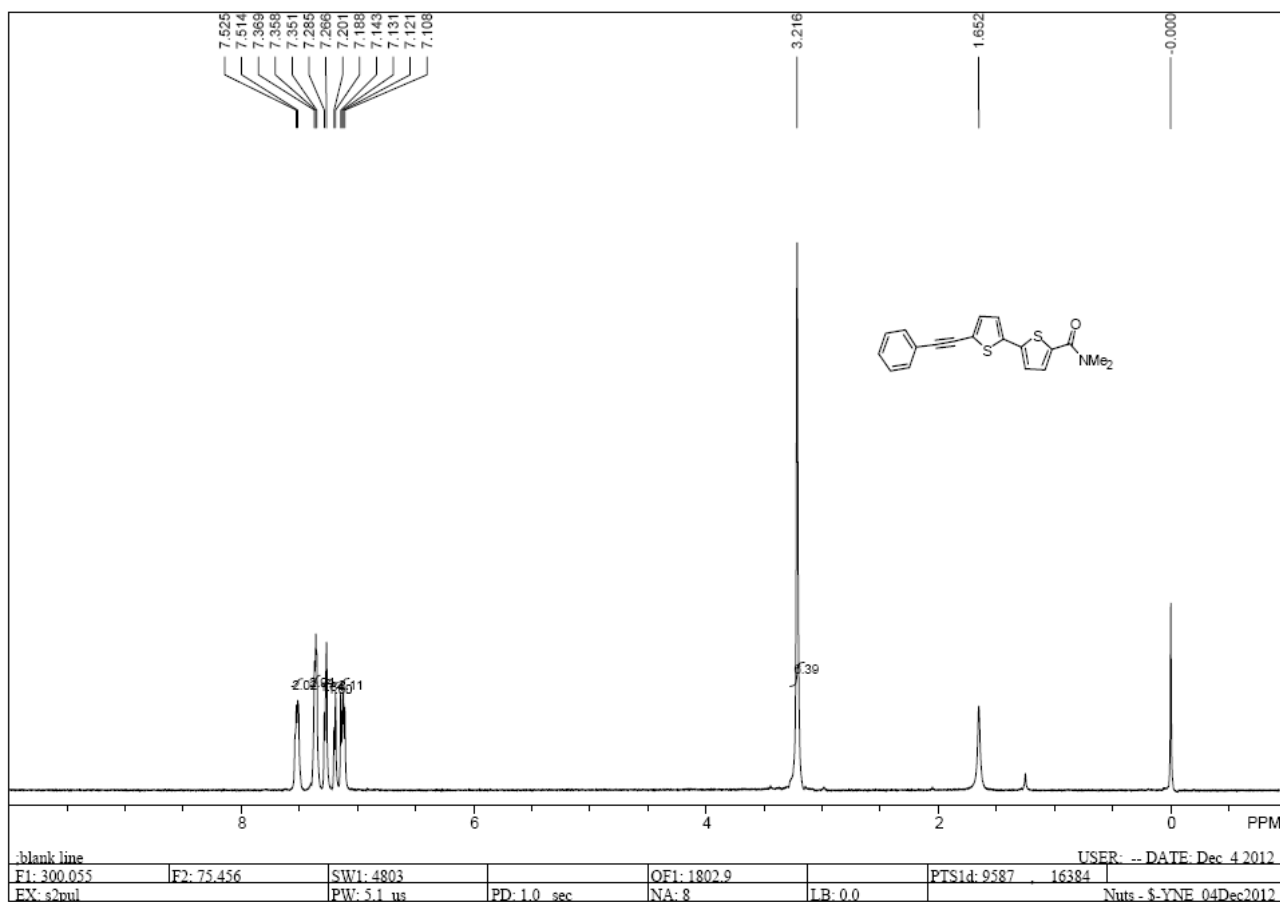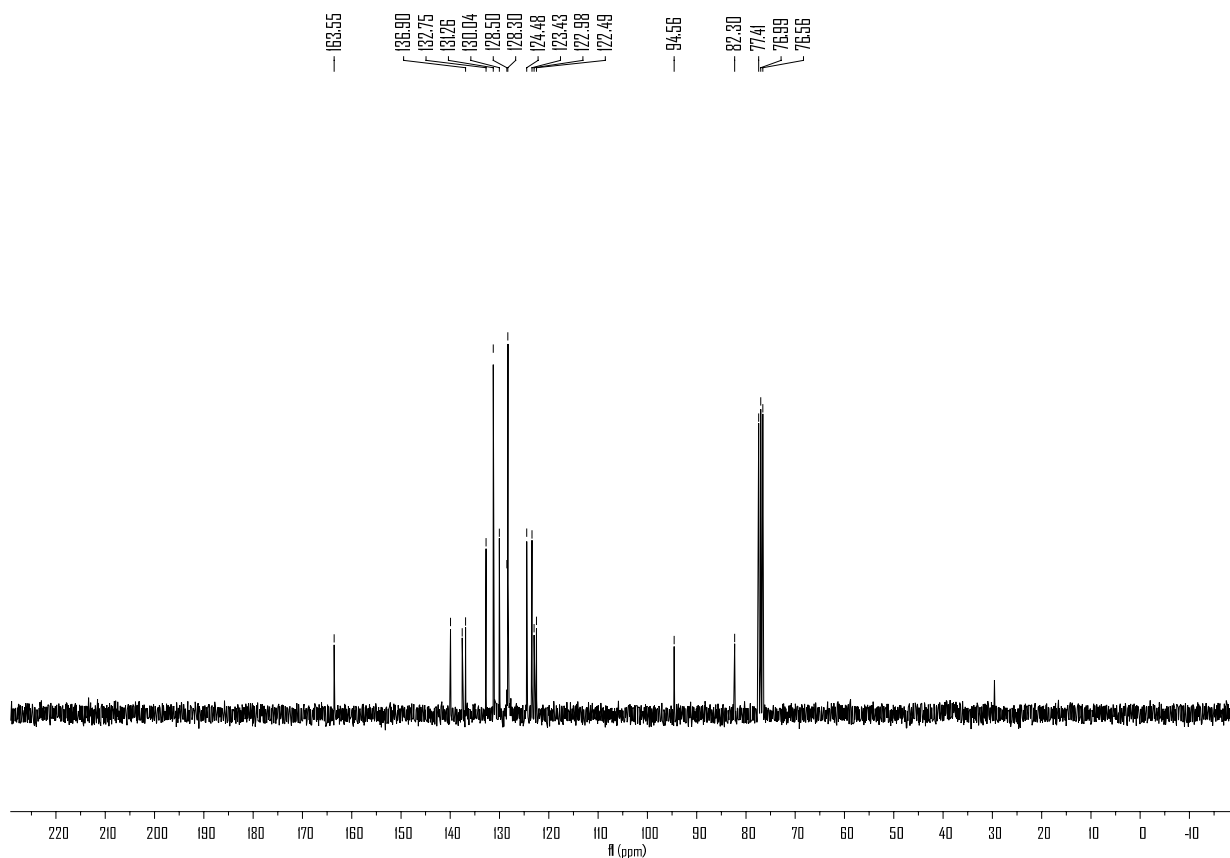

### Methyl 5'-(dimethylcarbamoyl)-[2,2'-bithiophene]-5-carboxylate (3p).

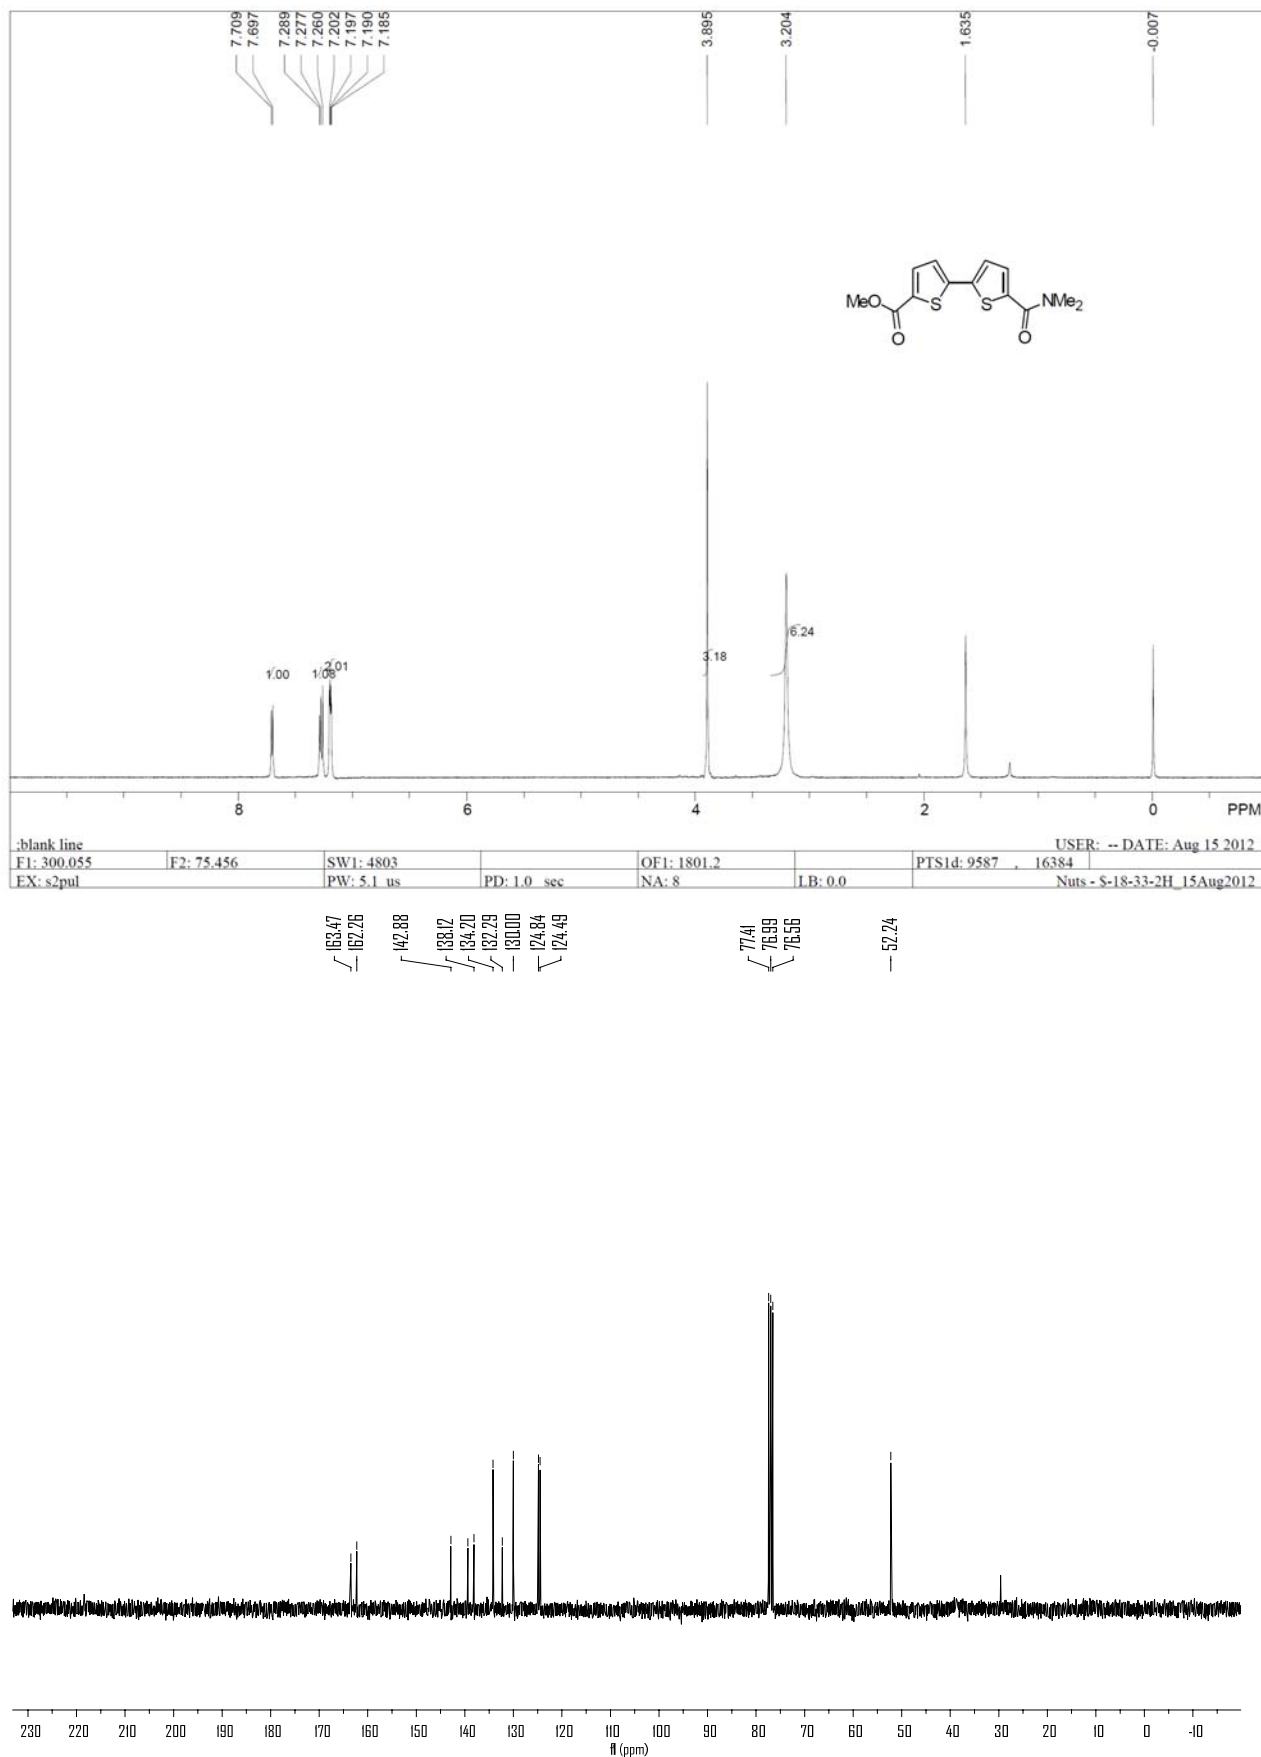

***N,N*-dimethyl-5'-(perfluorophenyl)-[2,2'-bithiophene]-5-carboxamide (3q).**

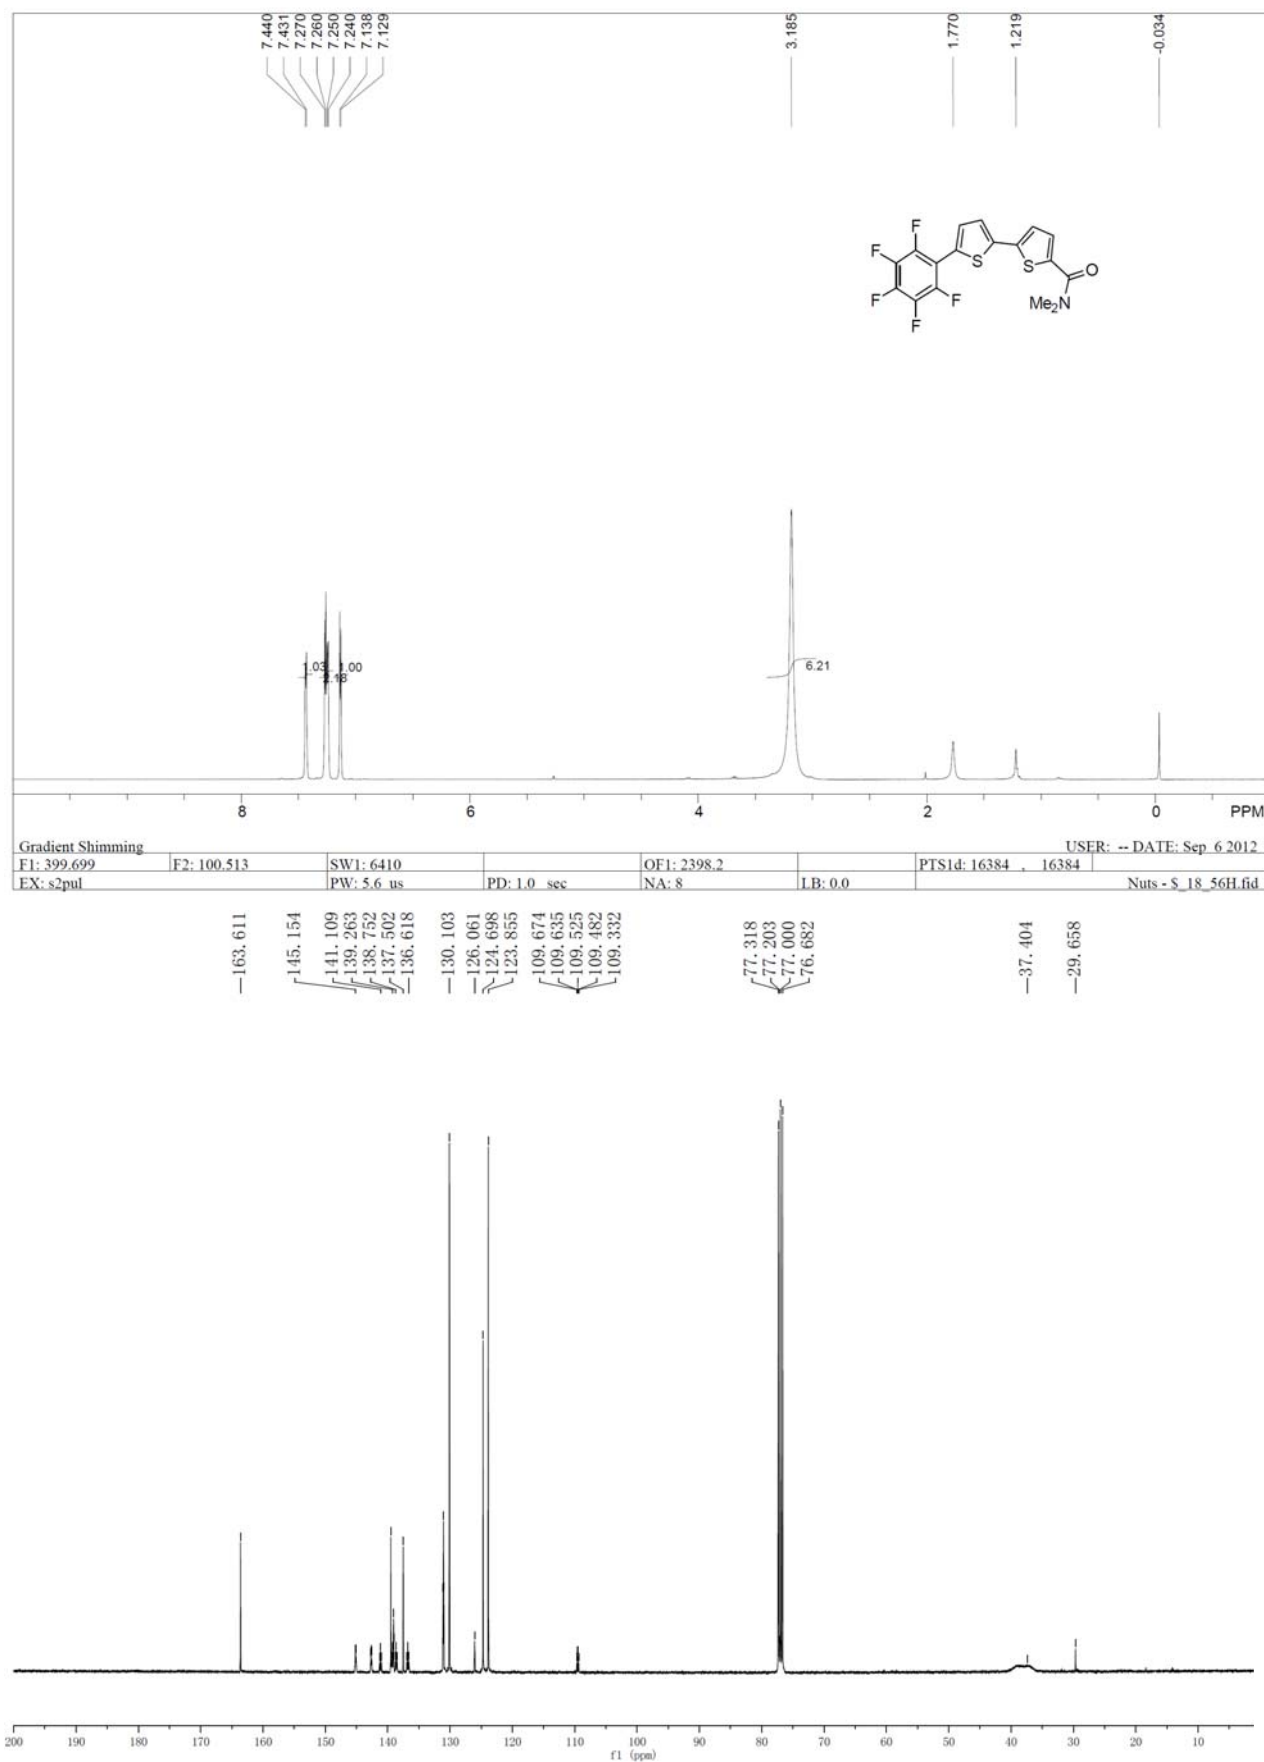

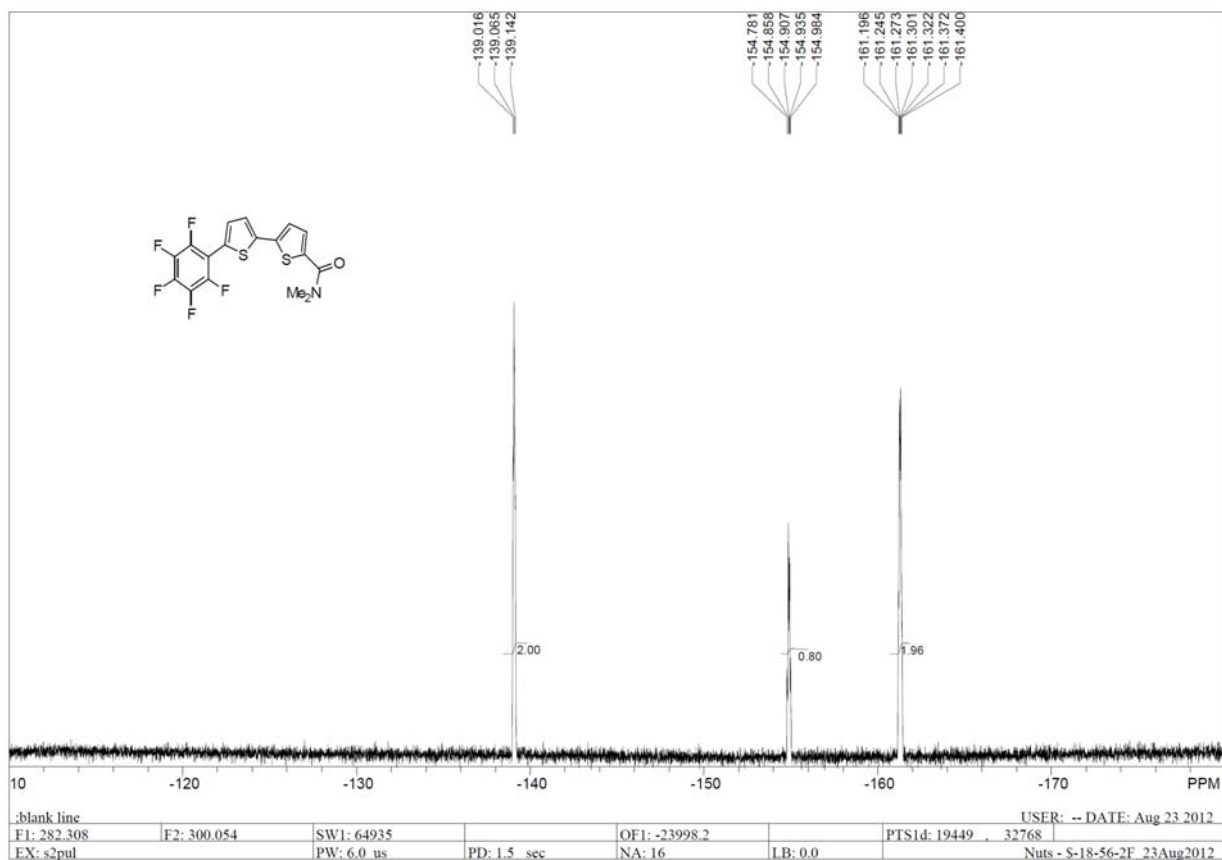

### 5-Bromo-4-hexyl-5'-methoxy-2,2'-bithiophene (3r).

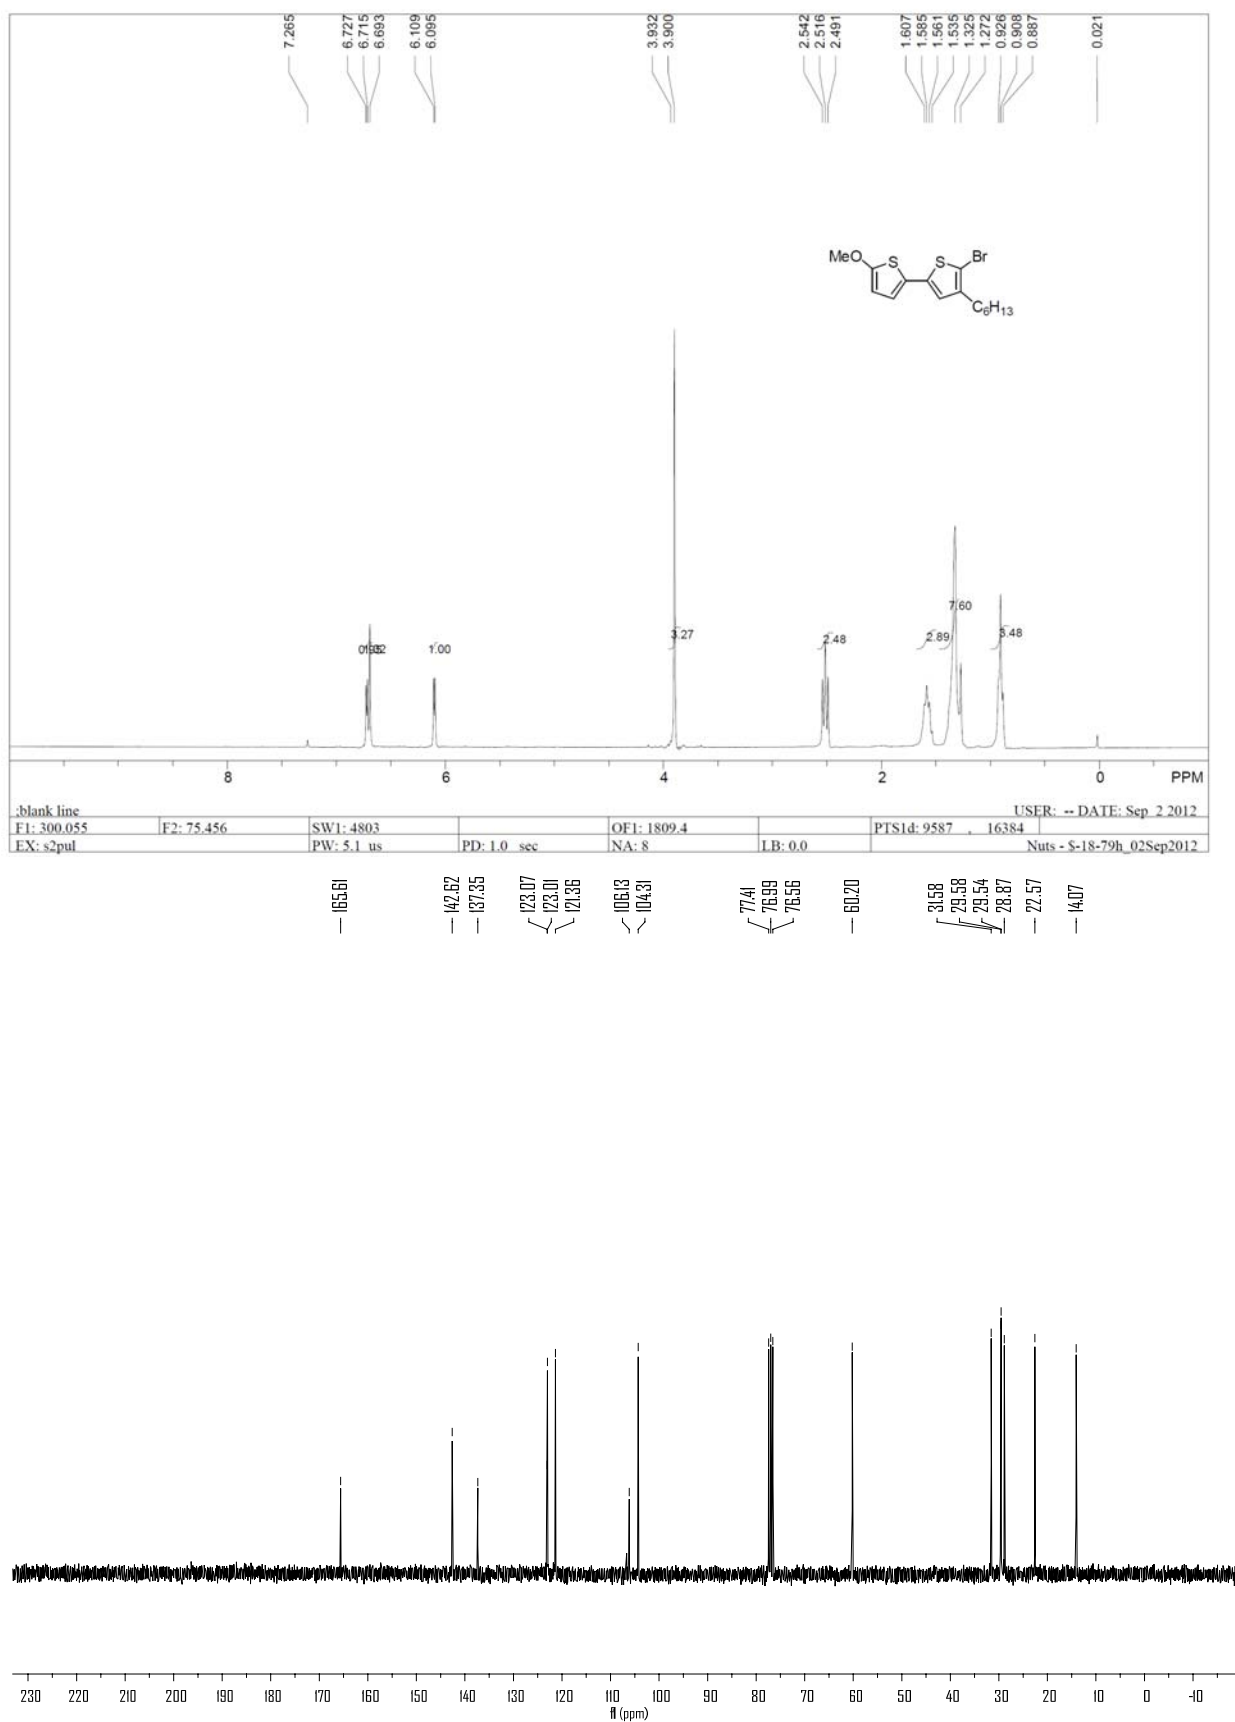

### 5-Methoxy-5'-methyl-2,2'-bithiophene (3s).

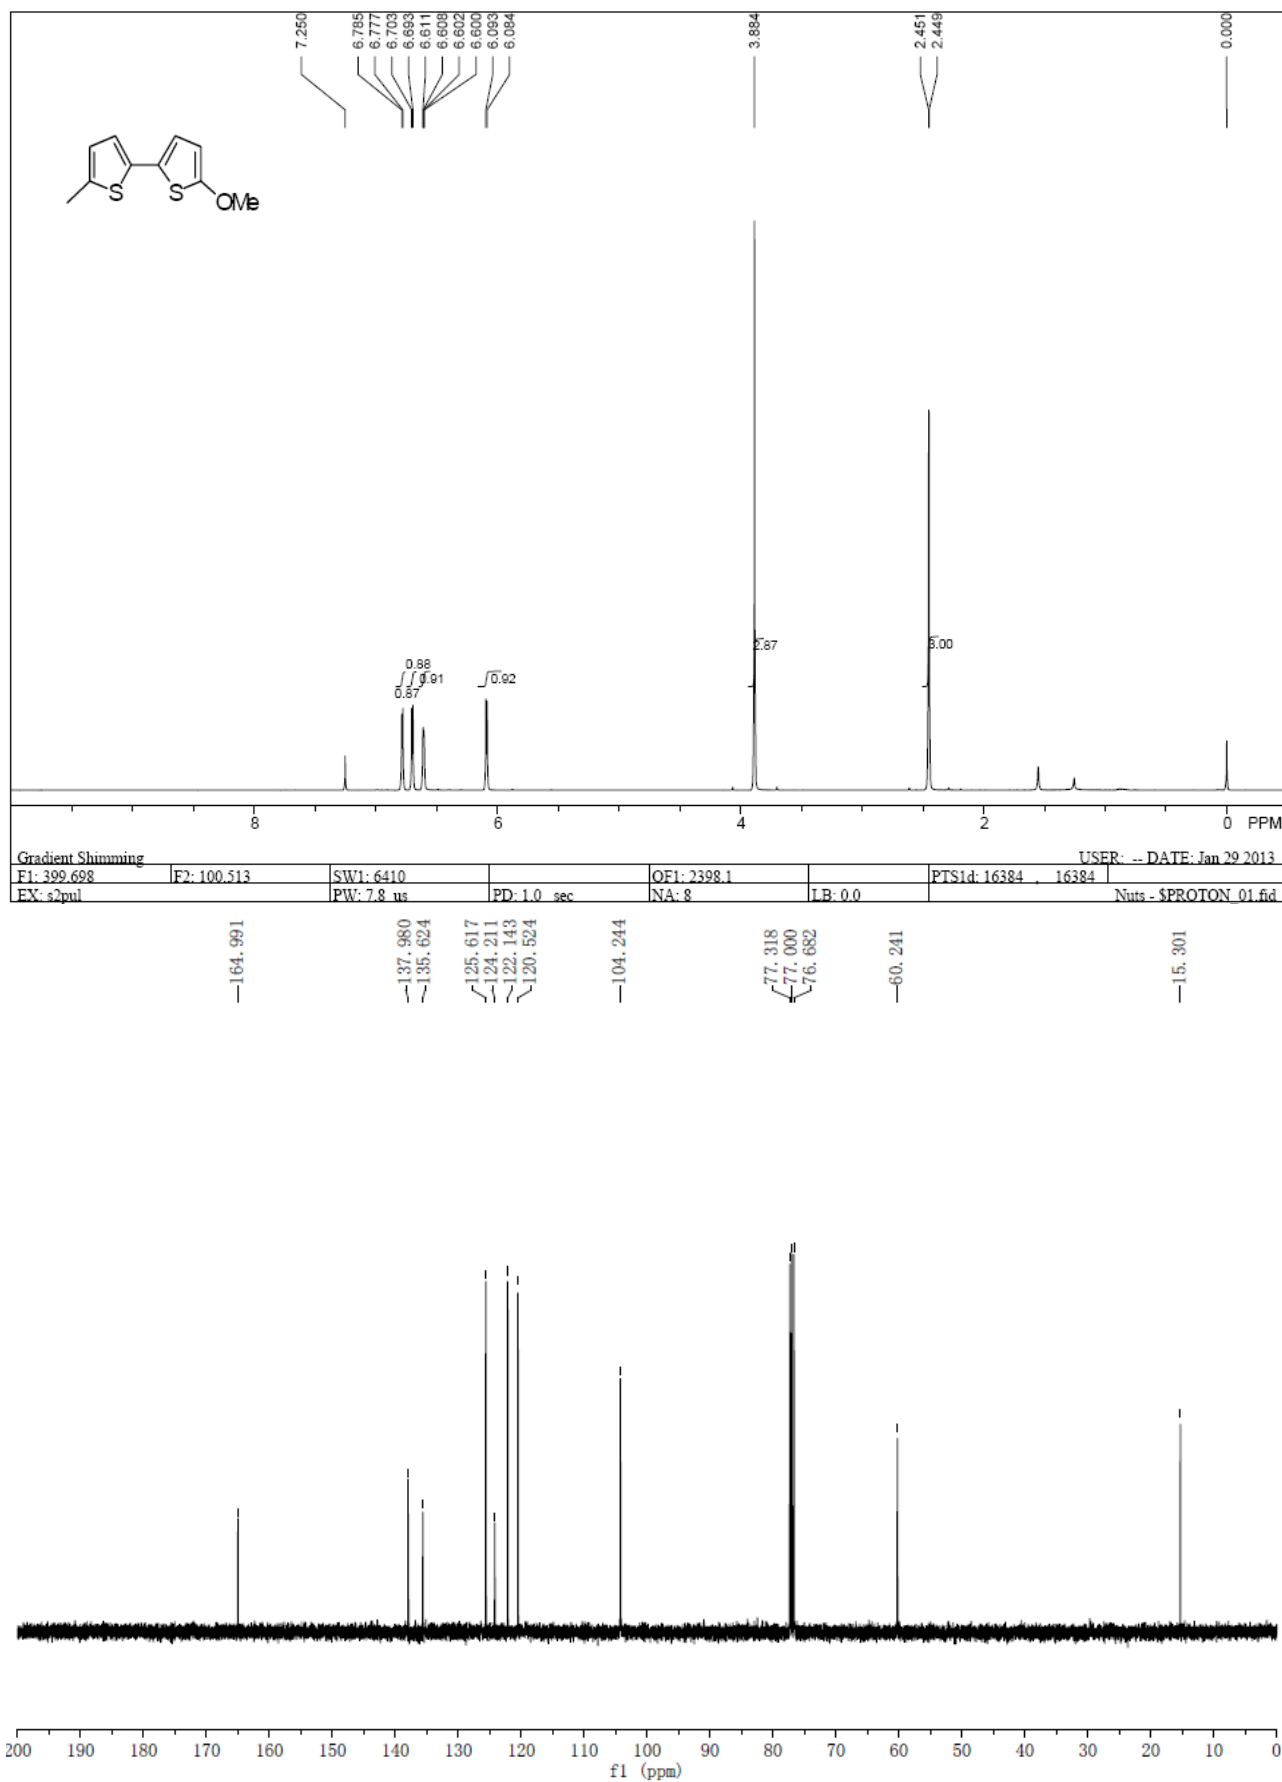



**5-Bromo-4-hexyl-5'-phenyl-2,2'-bithiophene (3t)**

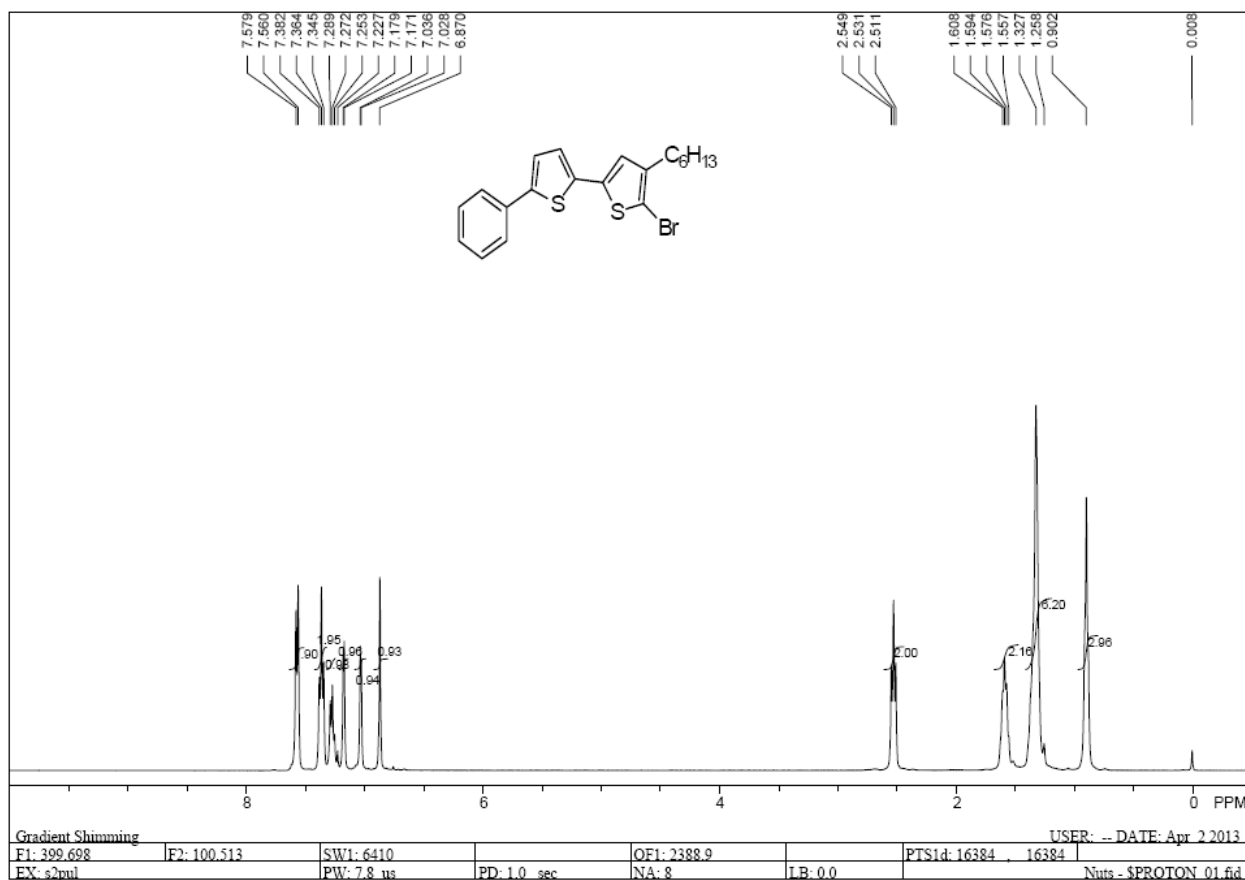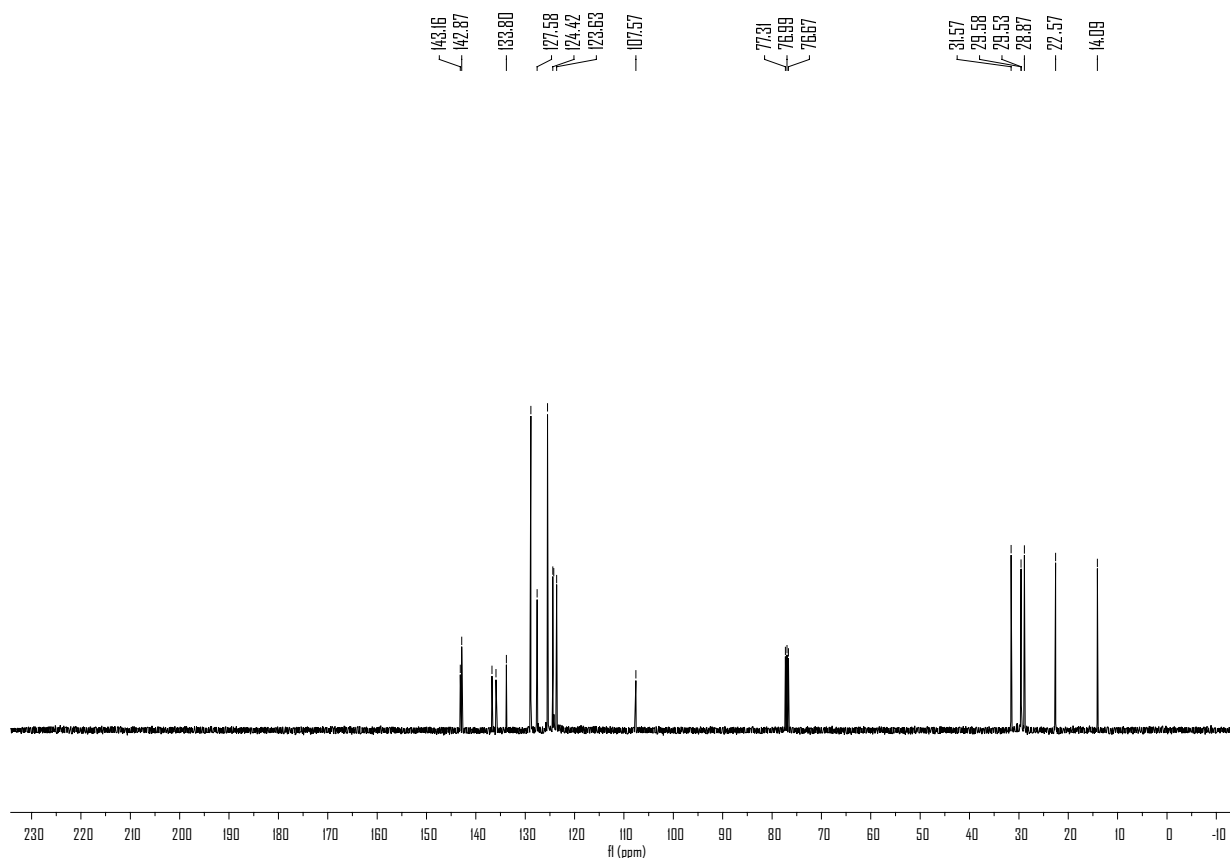

4-(5-(Benzo[b]thiophen-2-yl)thiophen-2-yl)-N,N-diphenylaniline(3u).

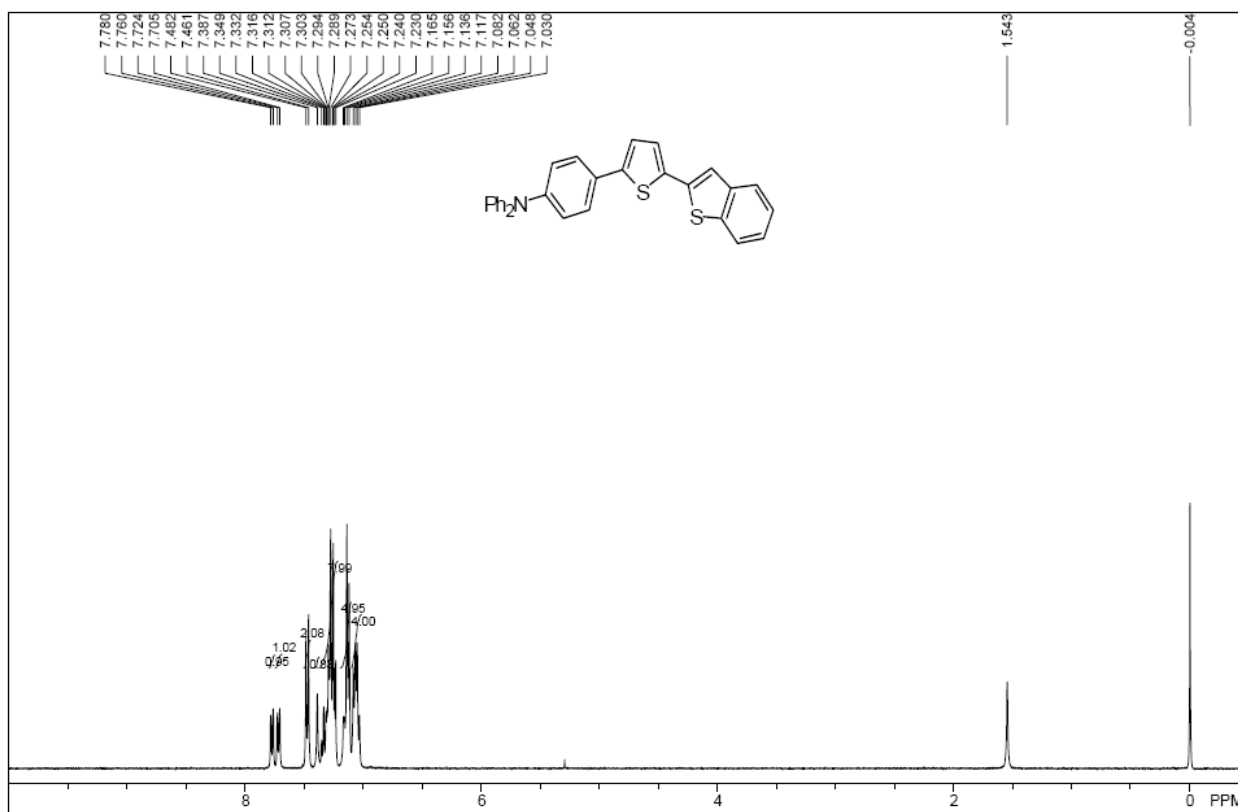

|                   |             |             |             |                      |                       |                            |  |
|-------------------|-------------|-------------|-------------|----------------------|-----------------------|----------------------------|--|
| Gradient Shimming |             |             |             |                      |                       | USER: -- DATE: Apr 22 2013 |  |
| F1: 399.698       | F2: 100.513 | SW1: 6410   | OF1: 2398.1 | PTS1d: 16384 , 16384 |                       |                            |  |
| EX: s2pul         | PW: 7.8 us  | PD: 1.0 sec | NA: 8       | LB: 0.0              | Nuts - SPROTON_01.fid |                            |  |

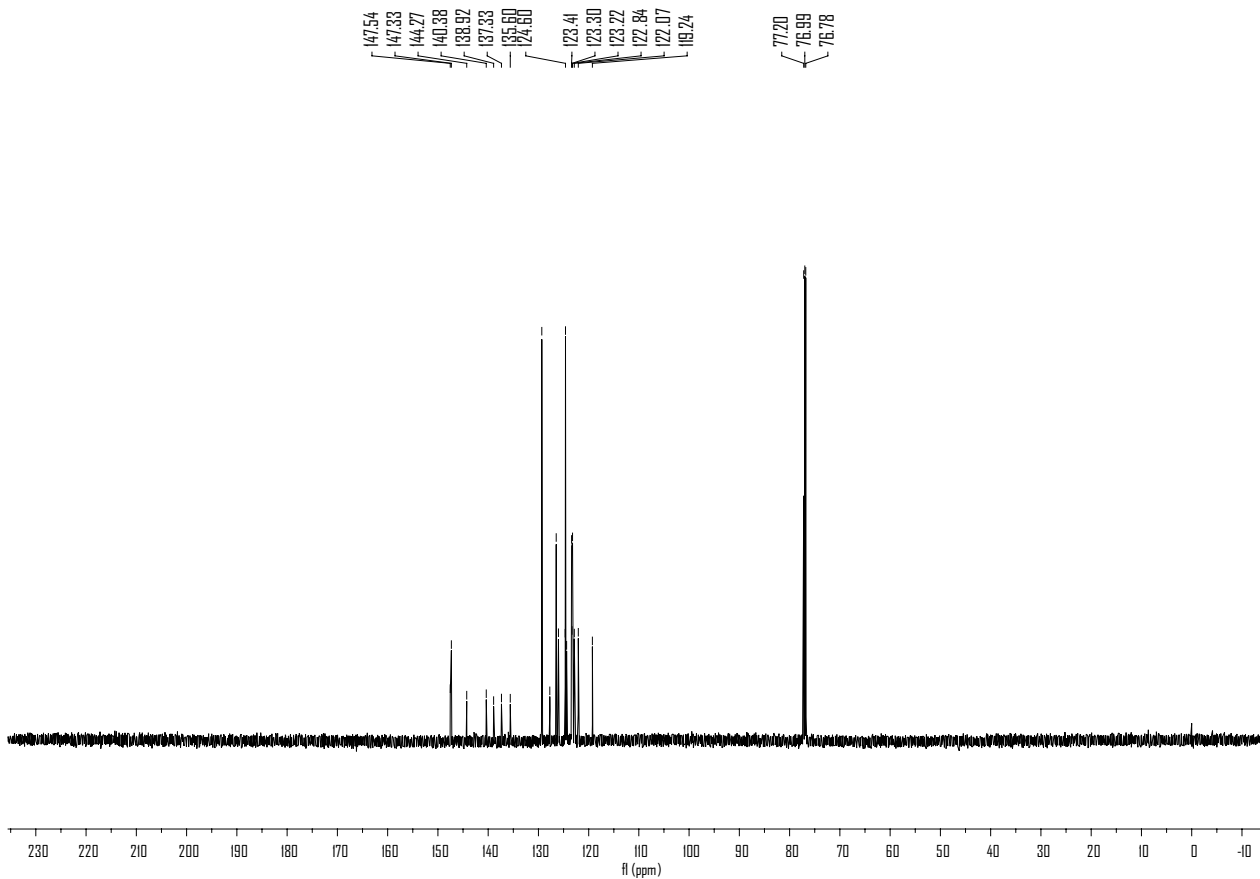

### 1-(5-(5-Ethylfuran-2-yl)thiophen-2-yl)ethanone (3v).

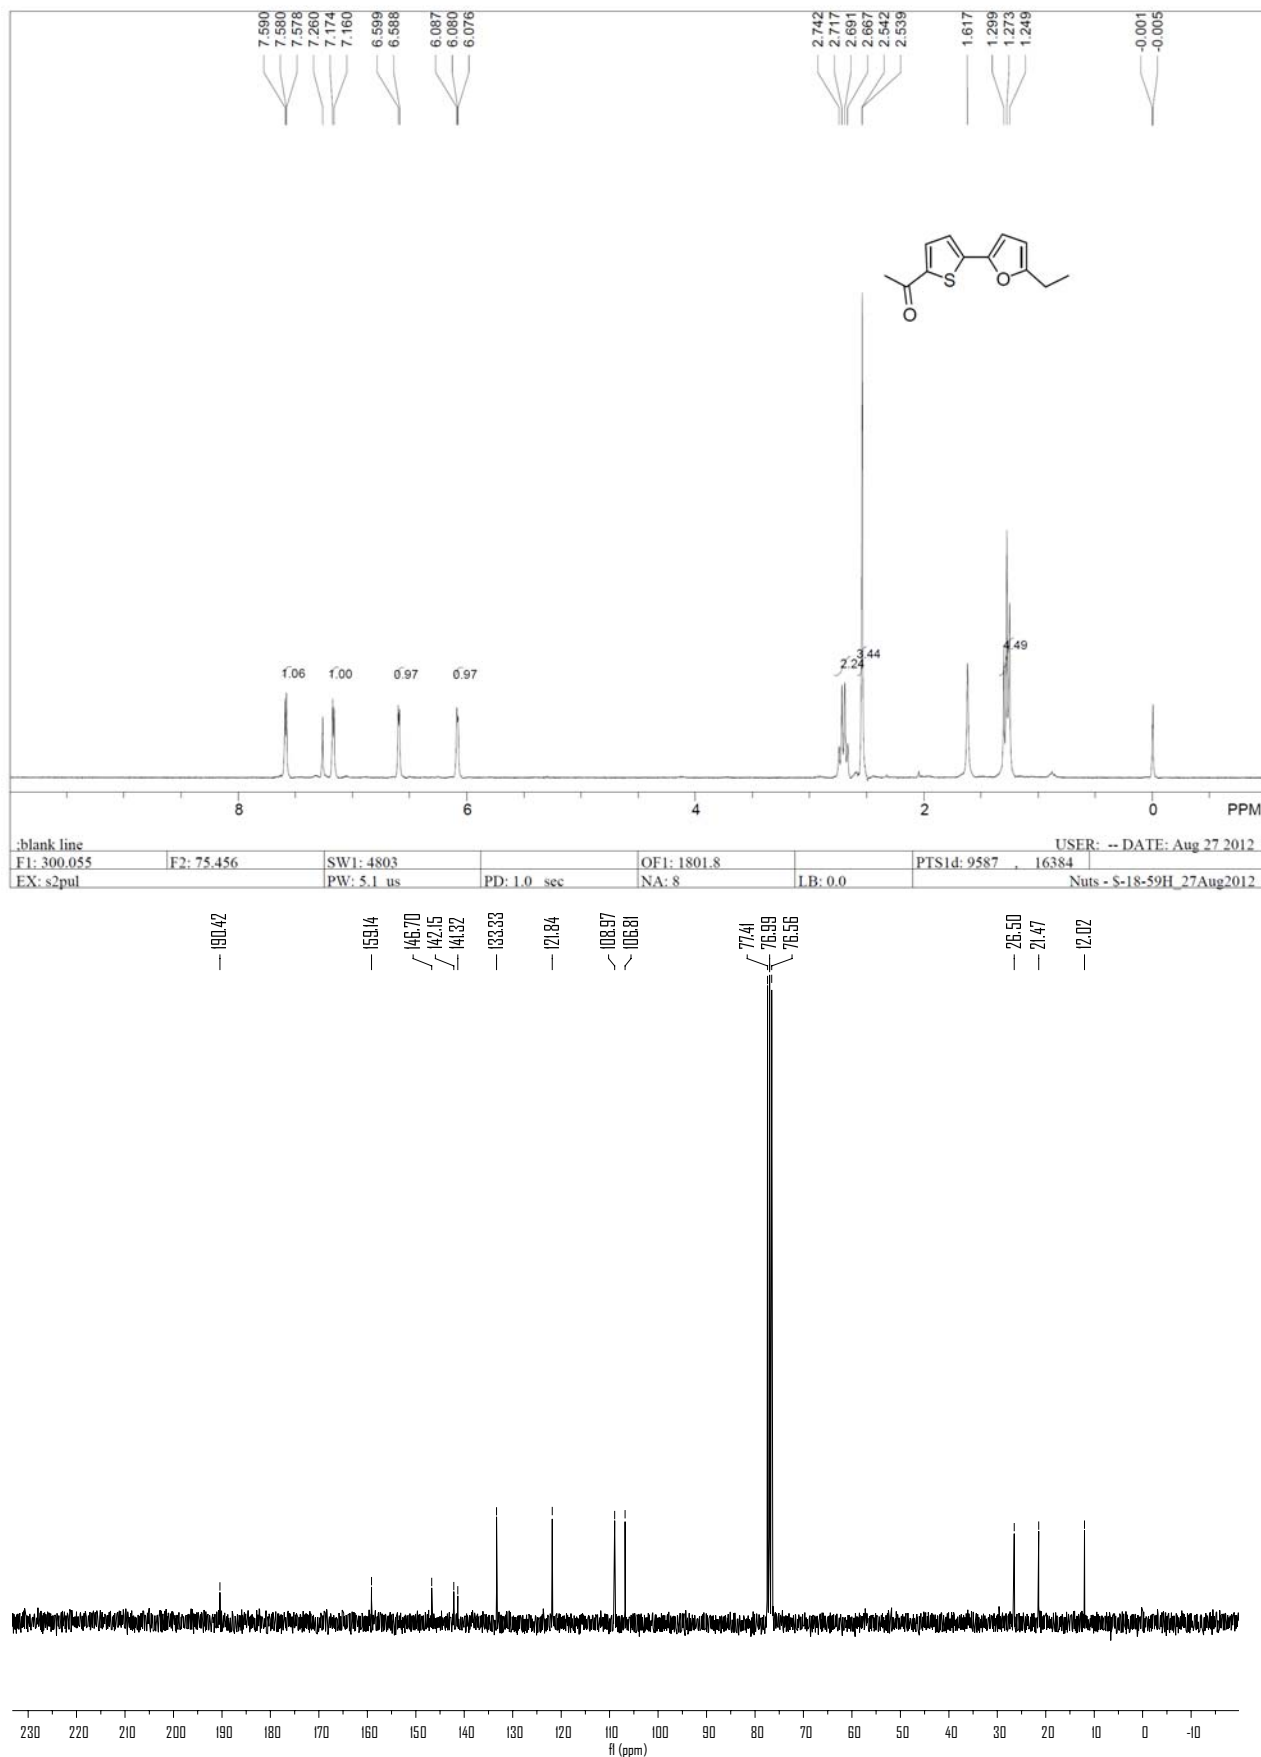

### 1-(5-(5-Ethylfuran-2-yl)thiophen-2-yl)ethanone (3w).

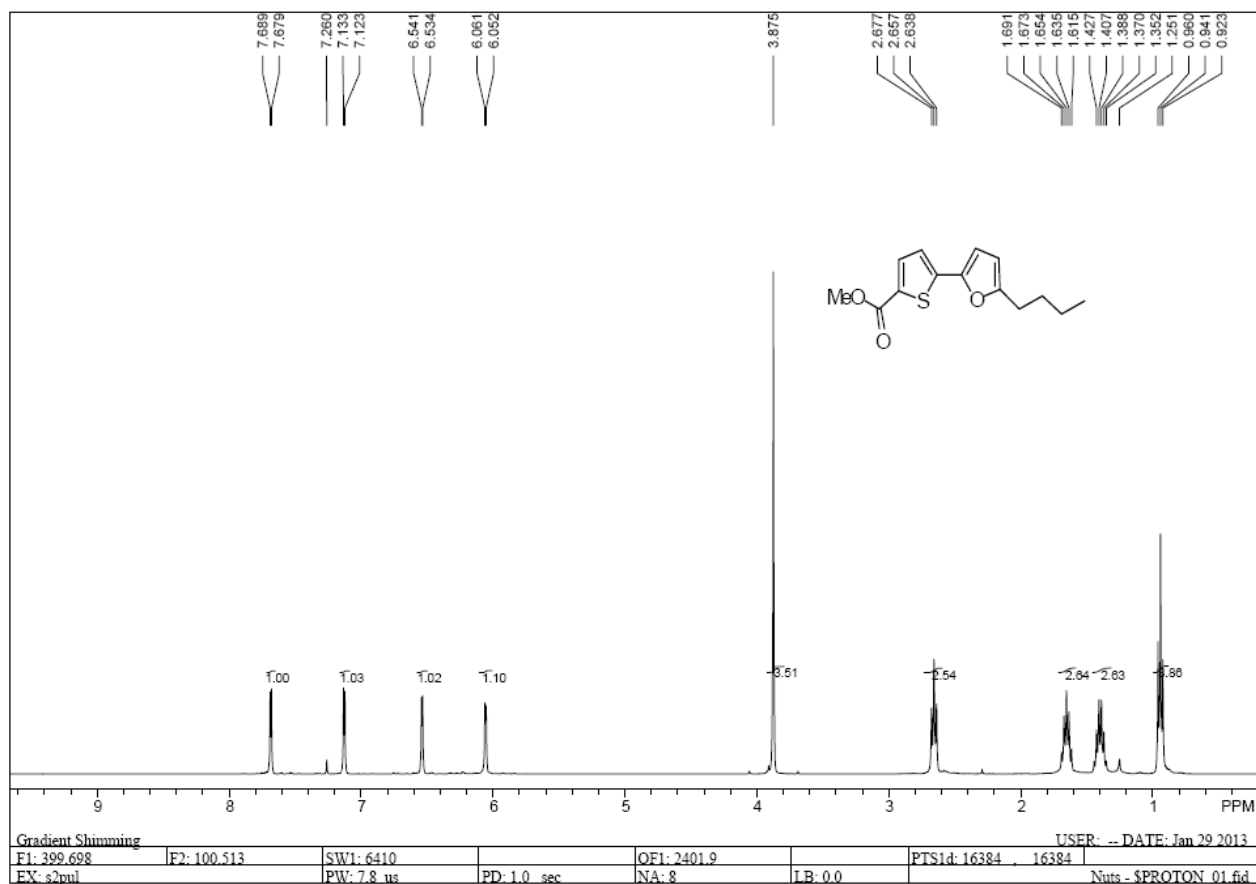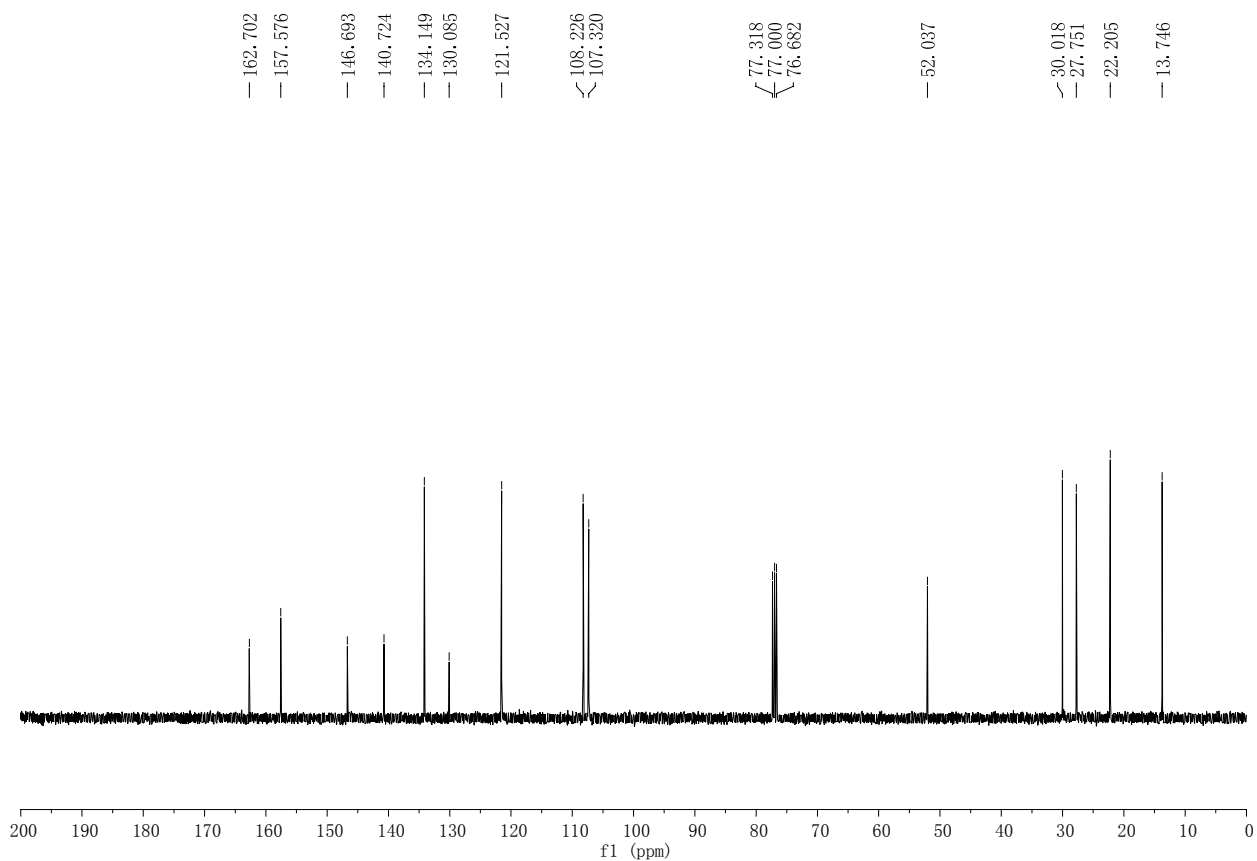

### 1-(5'-Ethyl-[2,2'-bifuran]-5-yl)ethanone (3x).

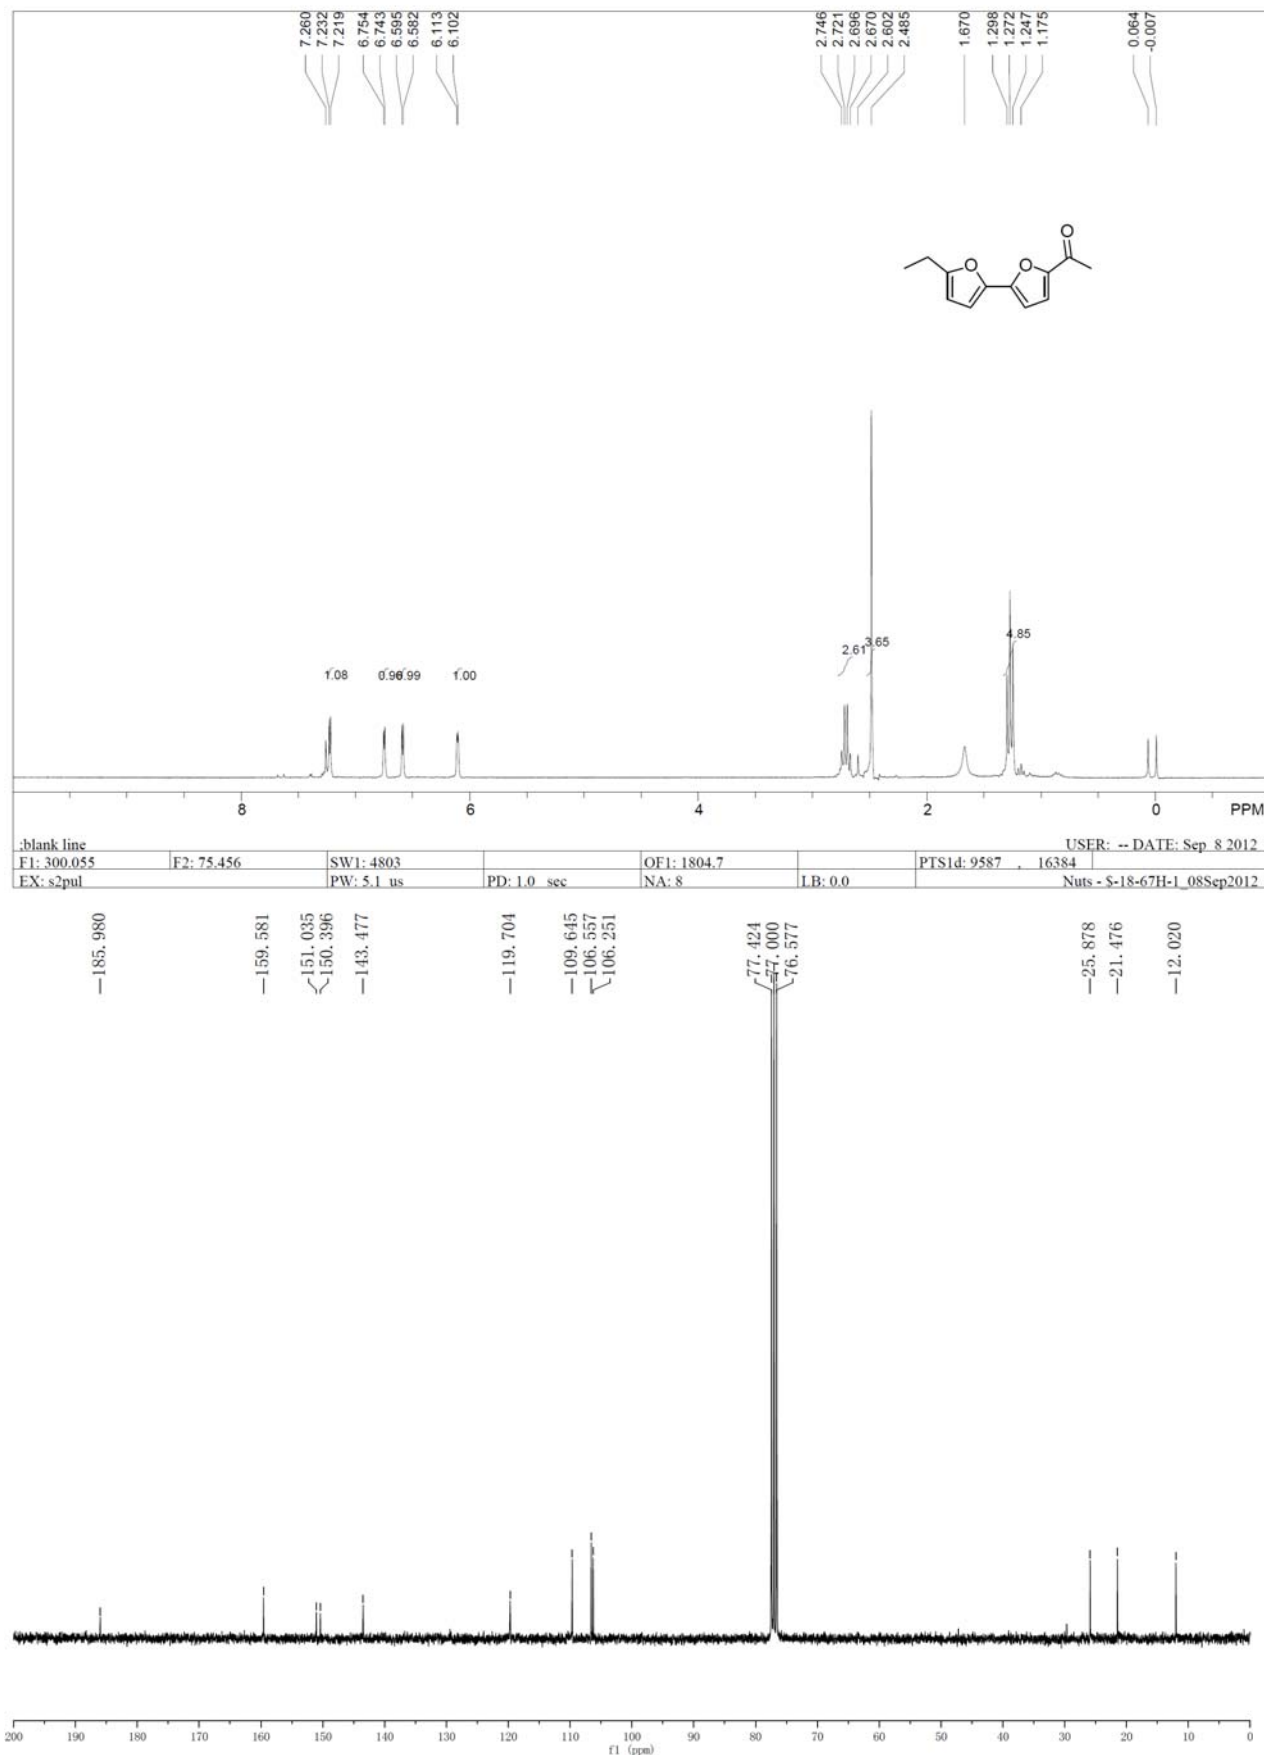

**3,6-bis(5'-bromo-4'-hexyl-[2,2'-bithiophen]-5-yl)-2,5-dioctylpyrrolo[3,4-c]pyrrole-1,4(2H,5H)-dione (3y)**

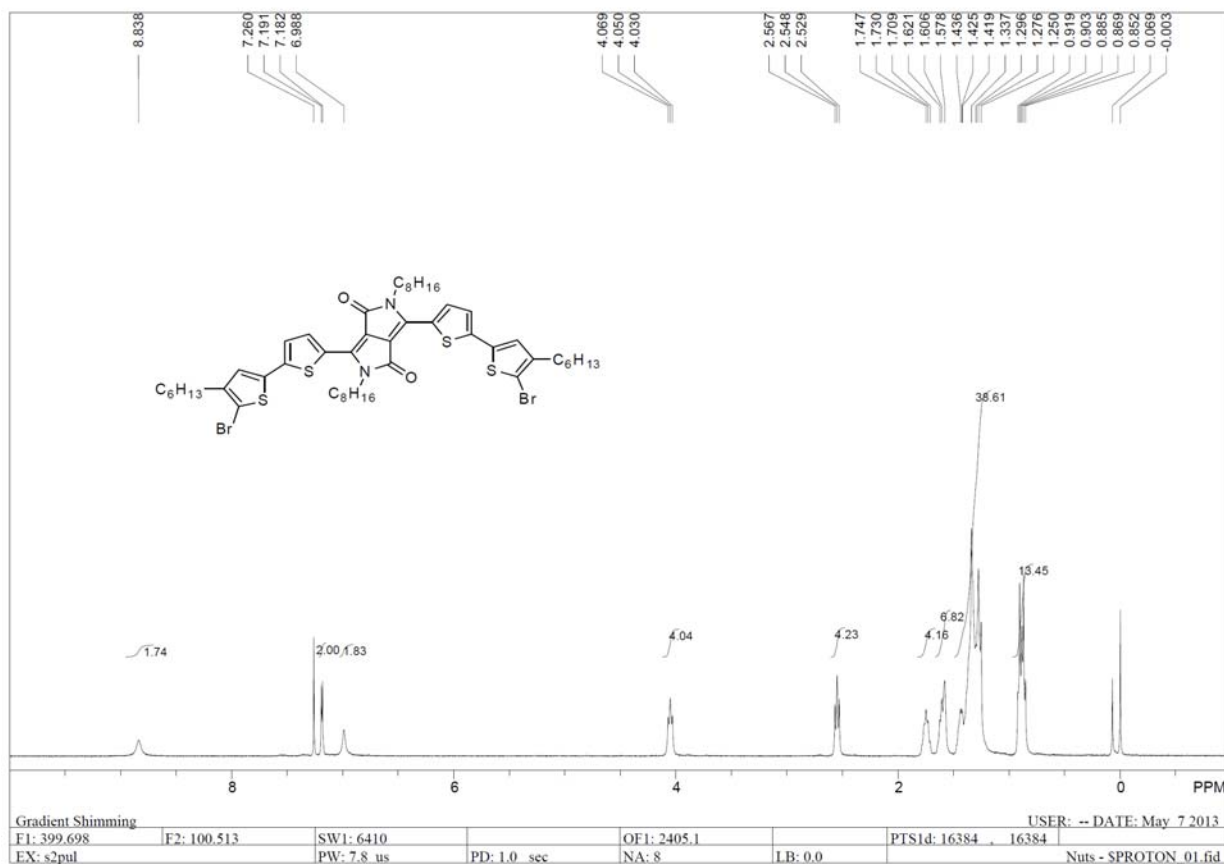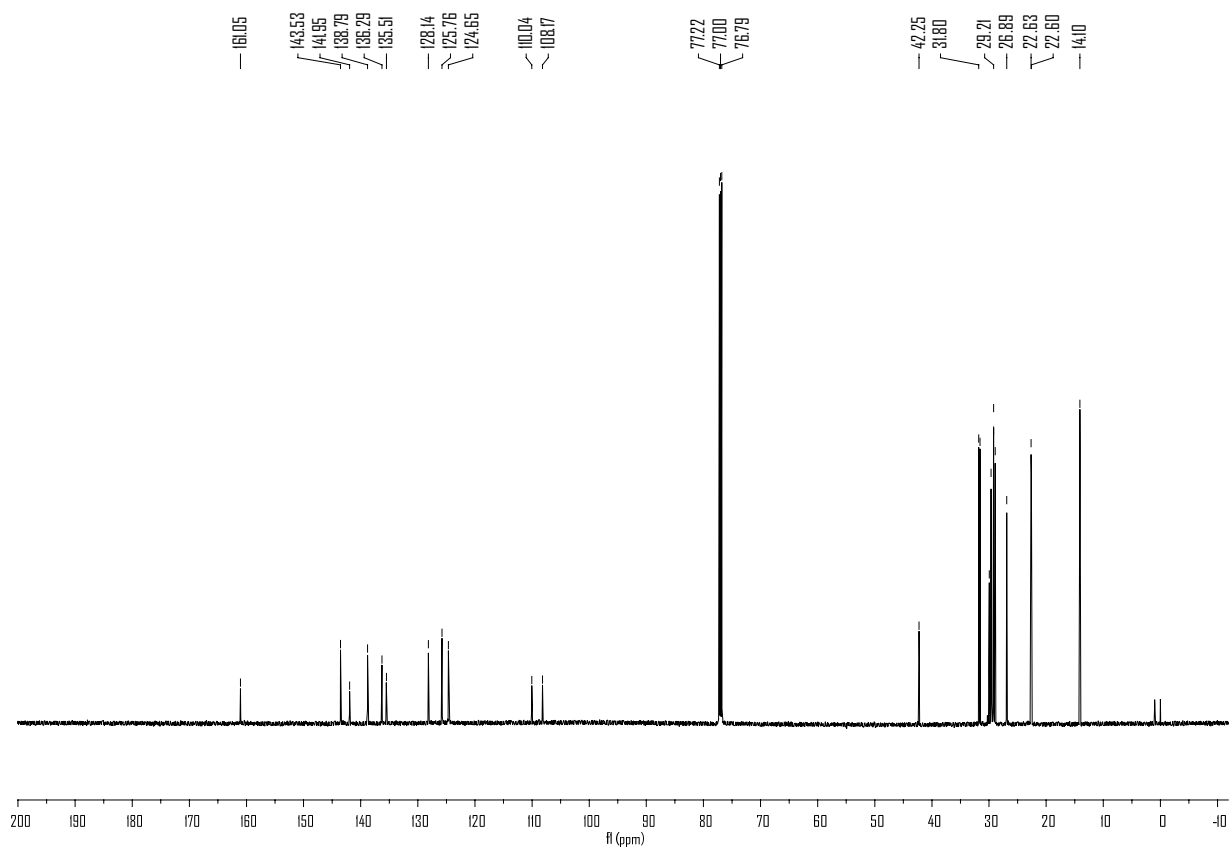

### 5''-Bromo-4''-hexyl-[2,2':5',2''-terthiophene]-5-carbaldehyde (5).

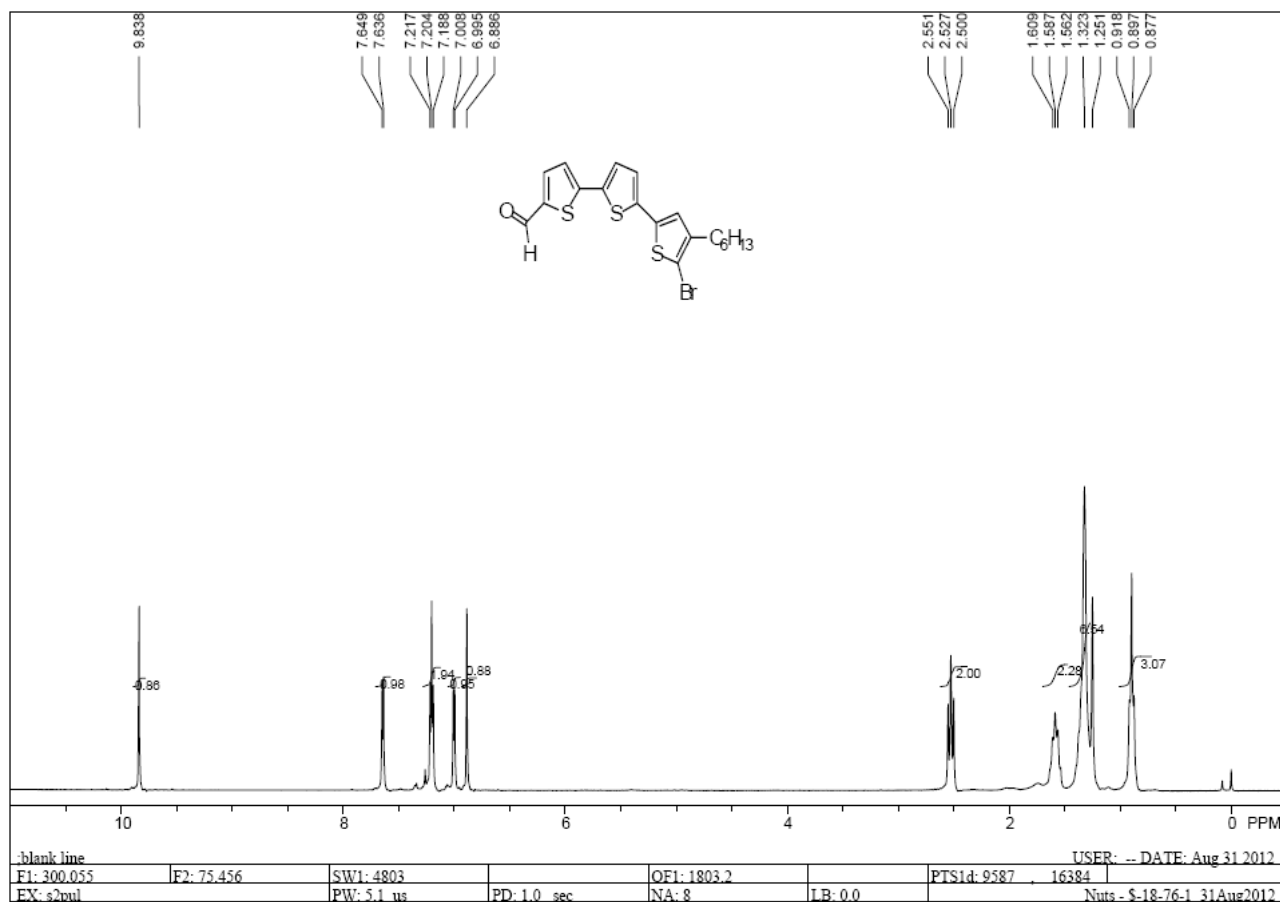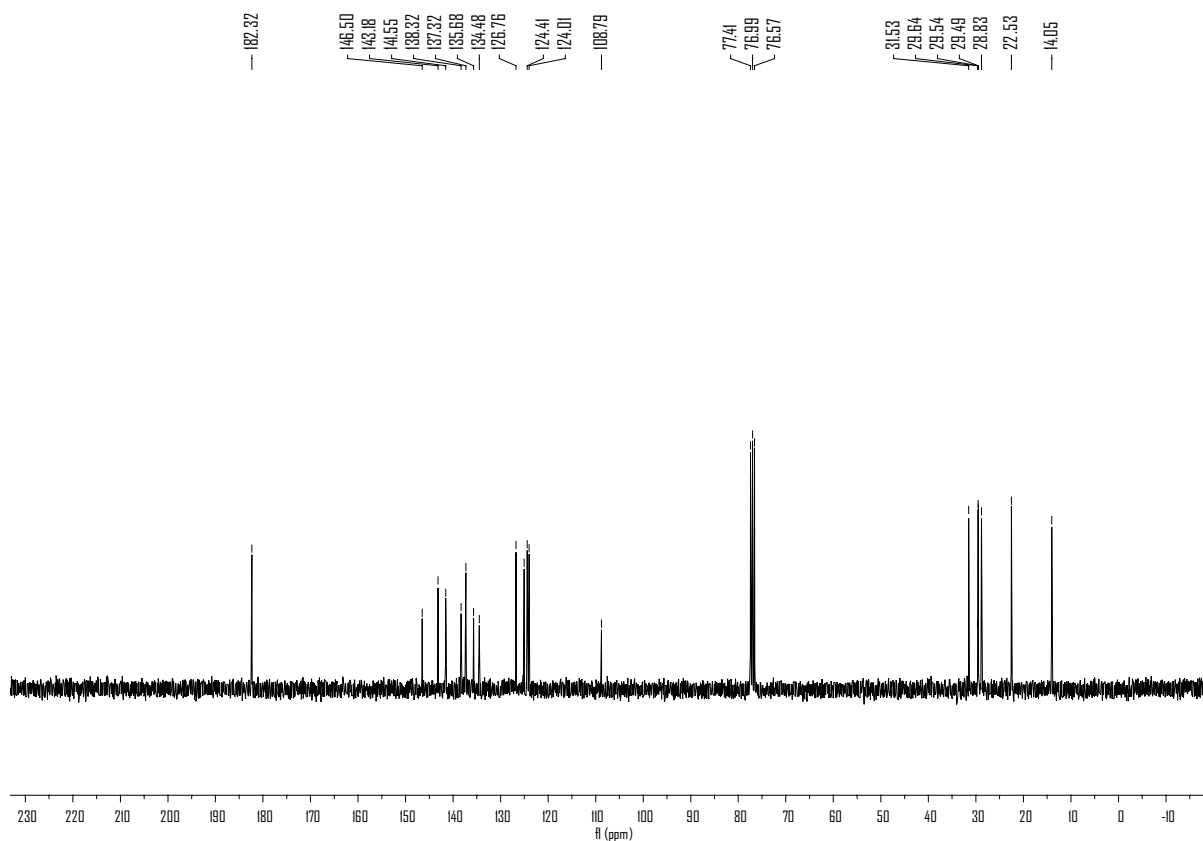

**5'''-(4-(diphenylamino)phenyl)-4''-hexyl-[2,2':5'',2'':5'',2'''-quaterthiophene]-5-carbaldehyde (6).**

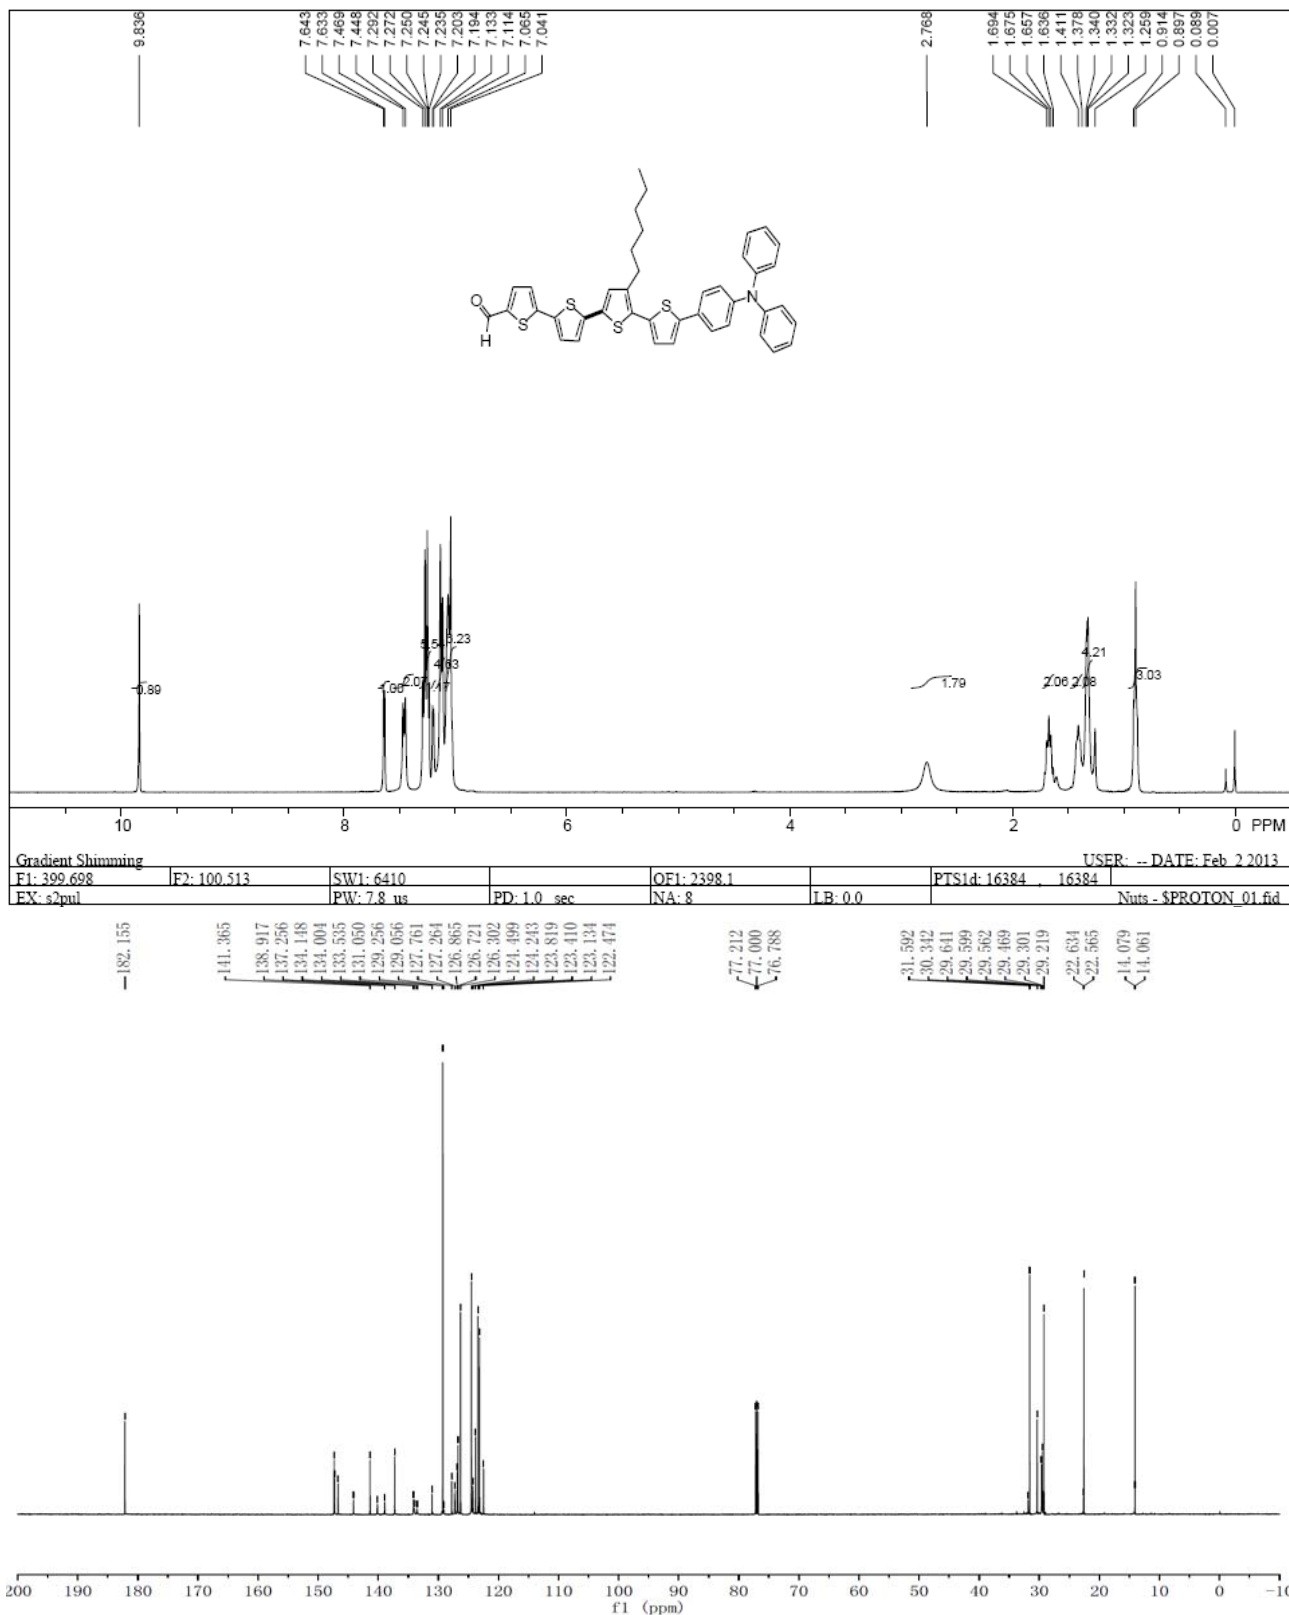



**2-Cyano-3-(5''-(4-(diphenylamino)phenyl)-4''-hexyl-[2,2':5',2'':5'',2'''-quaterthiophen]-5-yl)acrylic (7).**

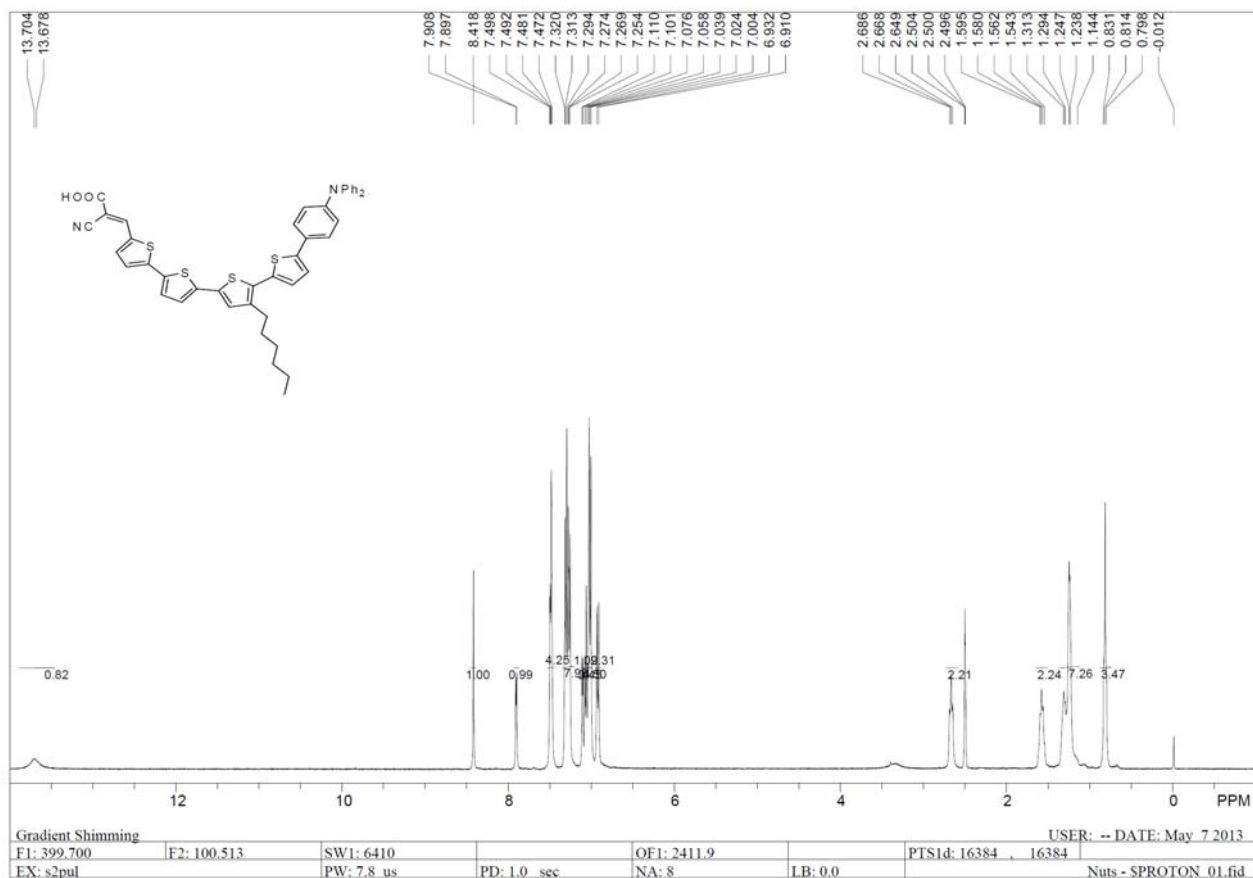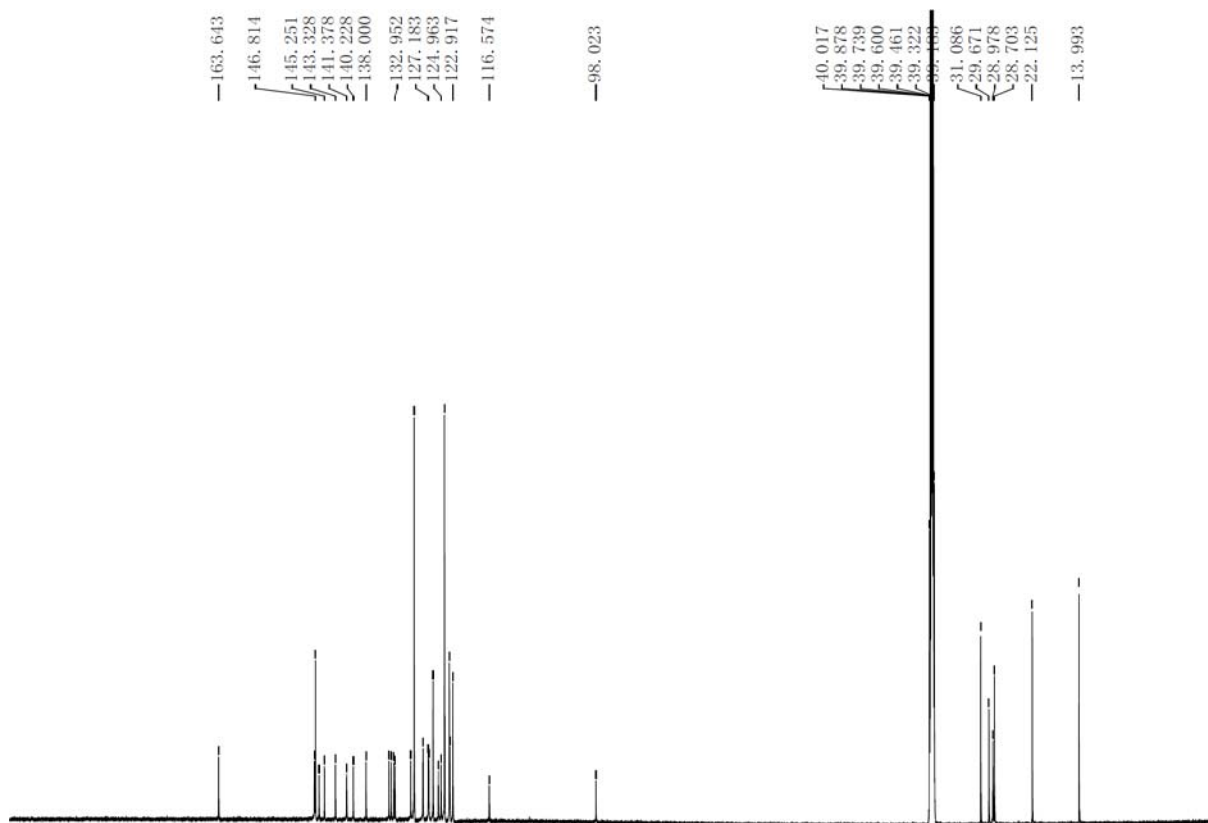

### 5'-(4-Methoxyphenyl)-[2,2'-bithiophene]-5-carbaldehyde (9)

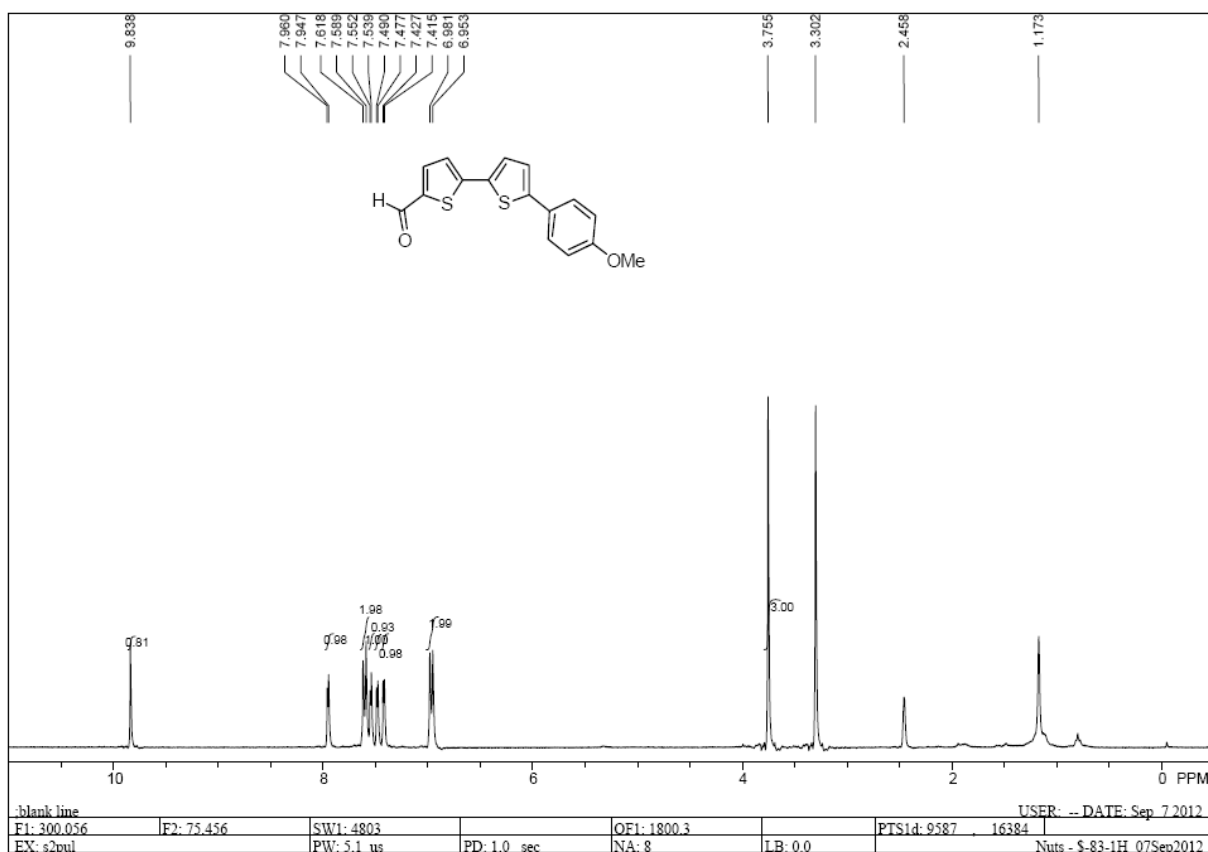

### 5'-(4-hydroxyphenyl)-[2,2'-bithiophene]-5-carbaldehyde (10)

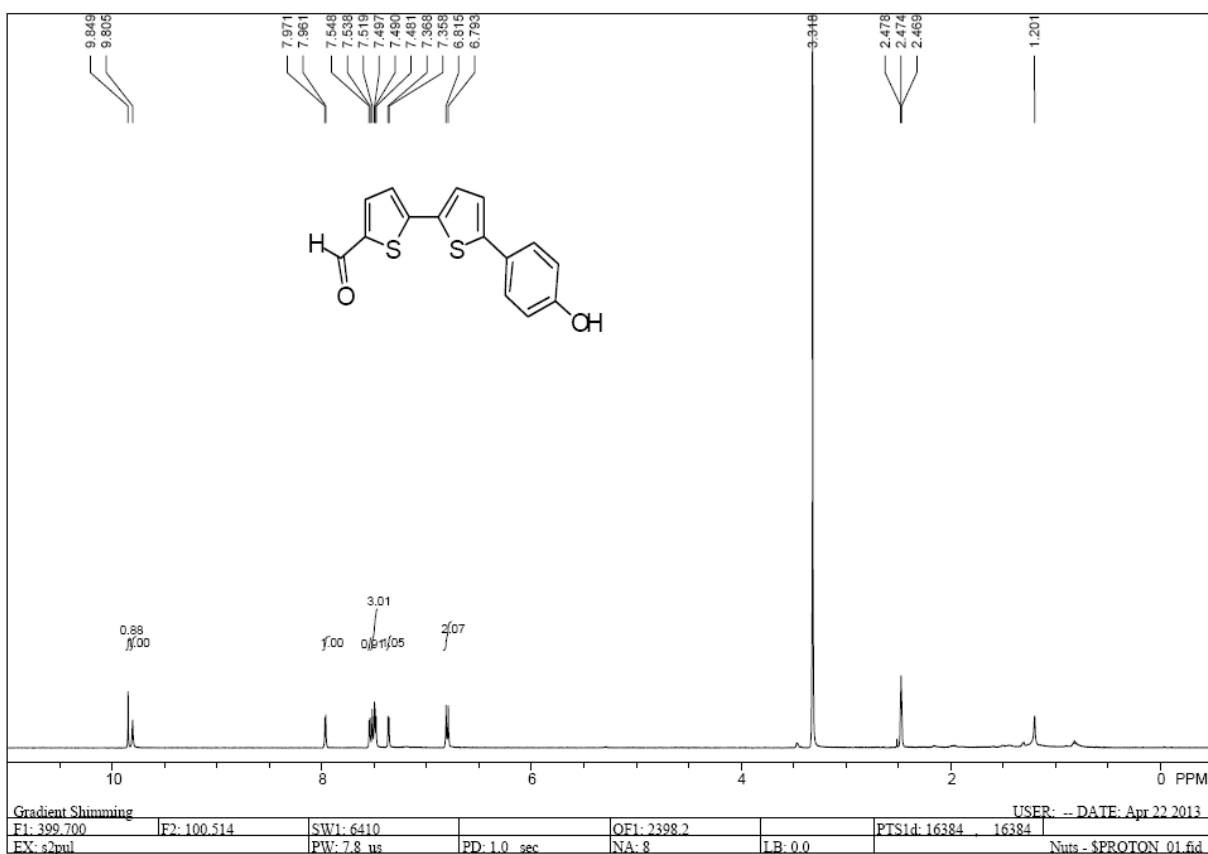

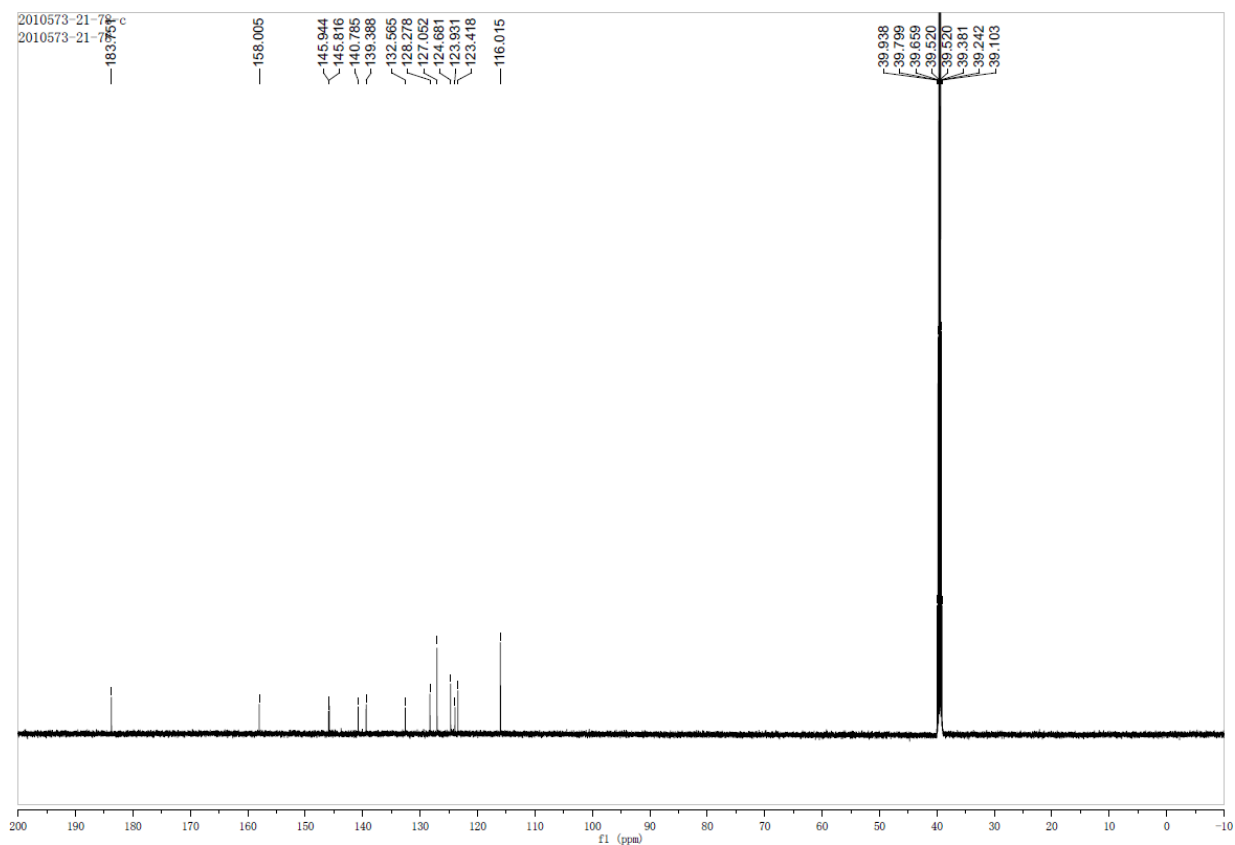

Compound 11

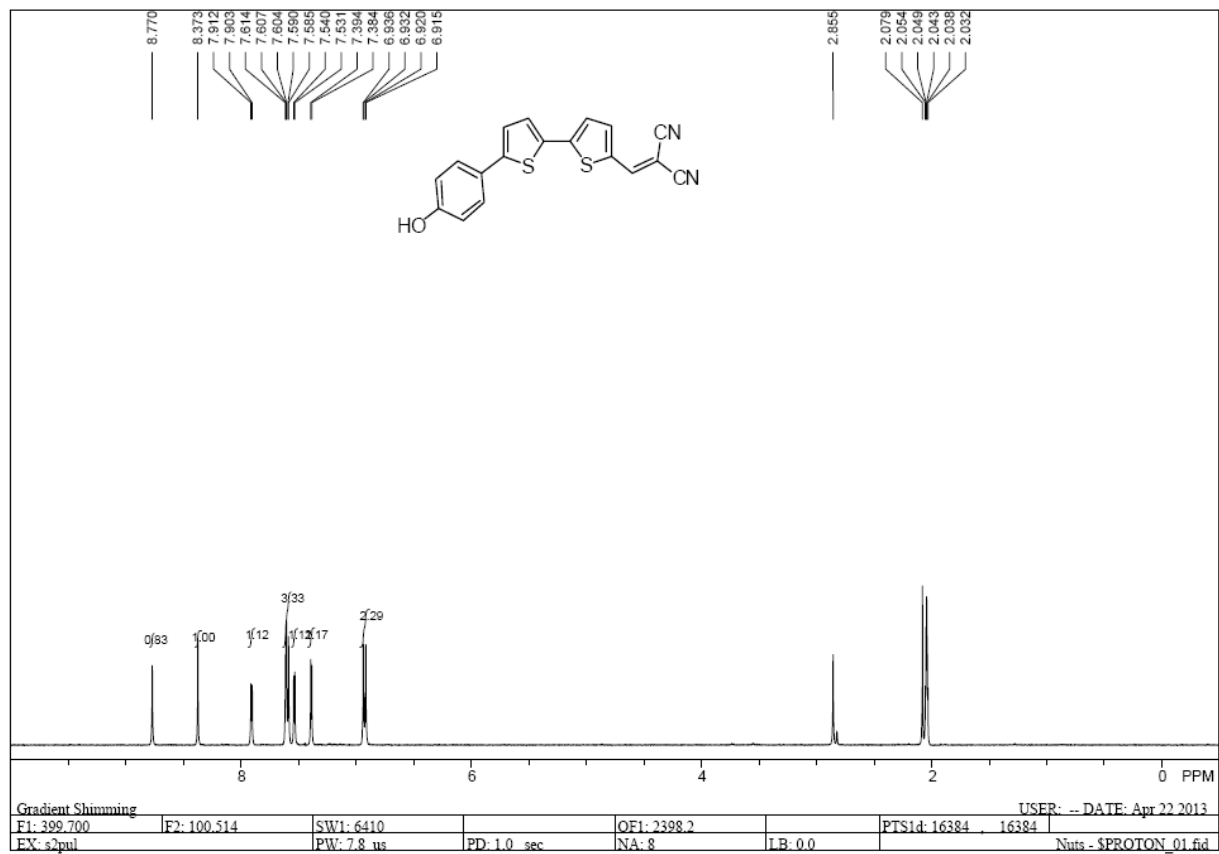

**d-2h**

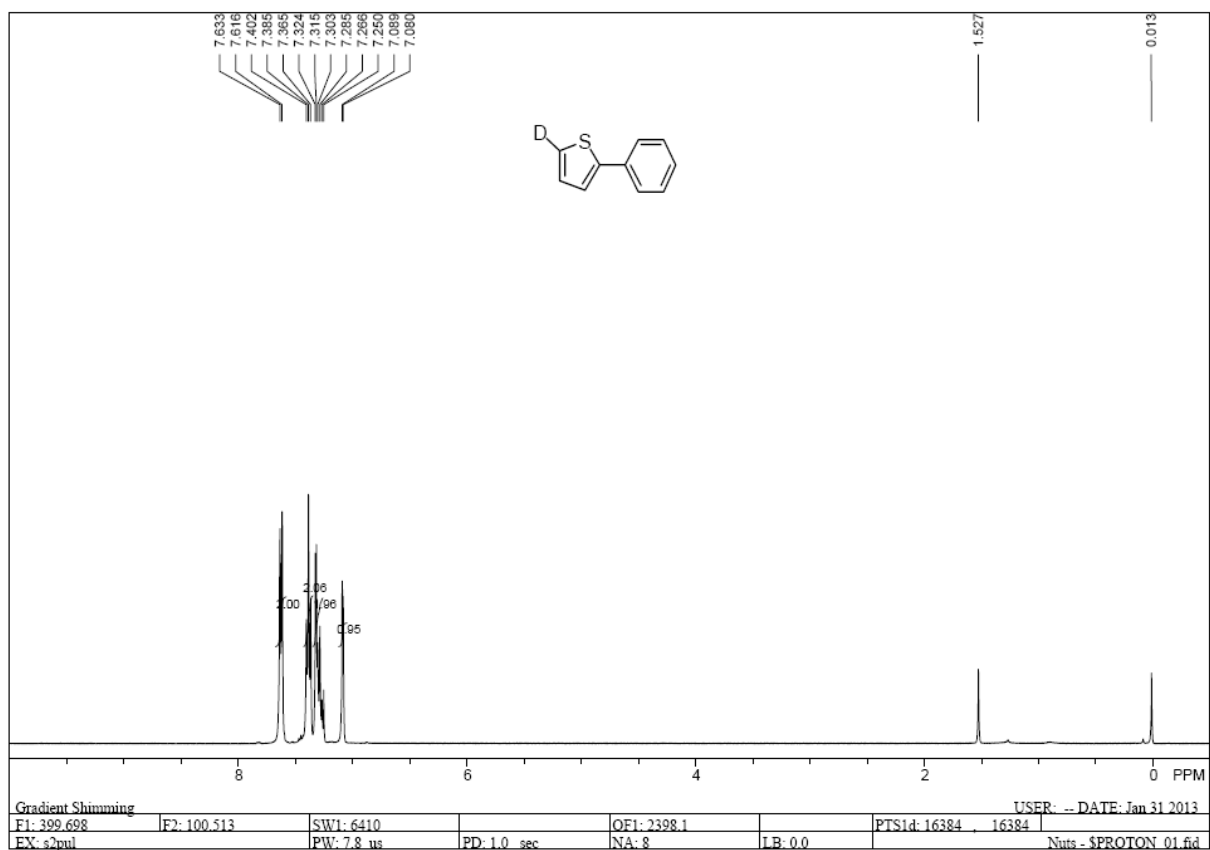

**d-1e**

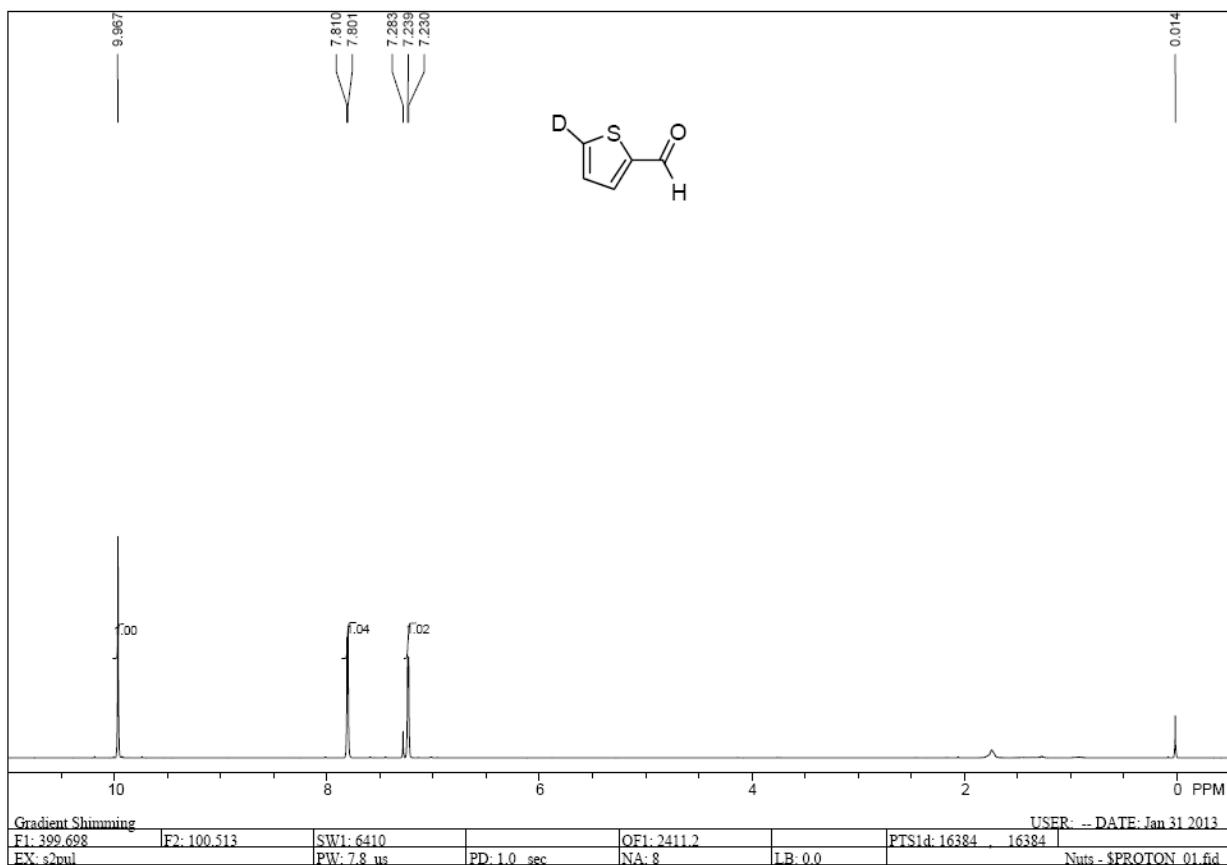

Supplement: c3sc51278a.pdf [file c3sc51278a.pdf]
